# Supplementary material for: Two-pot synthesis and photophysical studies of 1,6-disubstituted 5-aza-indoles from succinaldehyde and N-aryl propargylic-imines
Source: Royal Society of Chemistry journal article supplement (doi:10.1039/d1ob01949j), 2021-01-01
Supplement: d1ob01949j1.pdf [file d1ob01949j1.pdf]

## **Supporting Information**

### **Two-Pot Synthesis and Photophysical Studies of 1,6-disubstituted 5-Aza-Indoles from Succinaldehyde and N-Aryl Propargylic-Imines**

Satheeshvarma Vanaparthy,\*<sup>a</sup> Mamta,<sup>a</sup> Jyothi Yadav,<sup>a</sup> Amol Prakash Pawar,<sup>a</sup> Eldhose Iype,<sup>b</sup>

Sravendra Rana,<sup>c</sup> and Indresh Kumar\*<sup>a</sup>

<sup>a</sup>*Department of Chemistry, Birla Institute of Technology and Science, Pilani 333031, Rajasthan, India*

*E-mail: [indresh.kumar@pilani.bits-pilani.ac.in](mailto:indresh.kumar@pilani.bits-pilani.ac.in), [indresh.chemistry@gmail.com](mailto:indresh.chemistry@gmail.com), [varma.vanaparthy@gmail.com](mailto:varma.vanaparthy@gmail.com)*

<sup>b</sup>*Department of Chemical Engineering, Birla Institute of Technology and Science, Dubai Campus, Dubai 345055, UAE*

<sup>c</sup>*University of Petroleum & Energy Studies (UPES), School of Engineering, Energy Acres, Bidholi, Dehradun, 248007, India*

### **Table of Content**

---

|    |                                                                                |         |
|----|--------------------------------------------------------------------------------|---------|
| 1. | Photophysical Study Data                                                       | S2      |
| 2. | Copies of <sup>1</sup> H and <sup>13</sup> C NMR Spectra for all new compounds | S3-S61  |
| 3. | DFT calculation supporting data                                                | S62-S74 |

## Supporting data for the photophysical study

**Figure-S1:** (a) Normalized UV/Vis absorption, (b) normalized fluorescent emission of compound **5a** ( $c = 10^{-4}$  M) in different solvents at  $T = 298$  K.

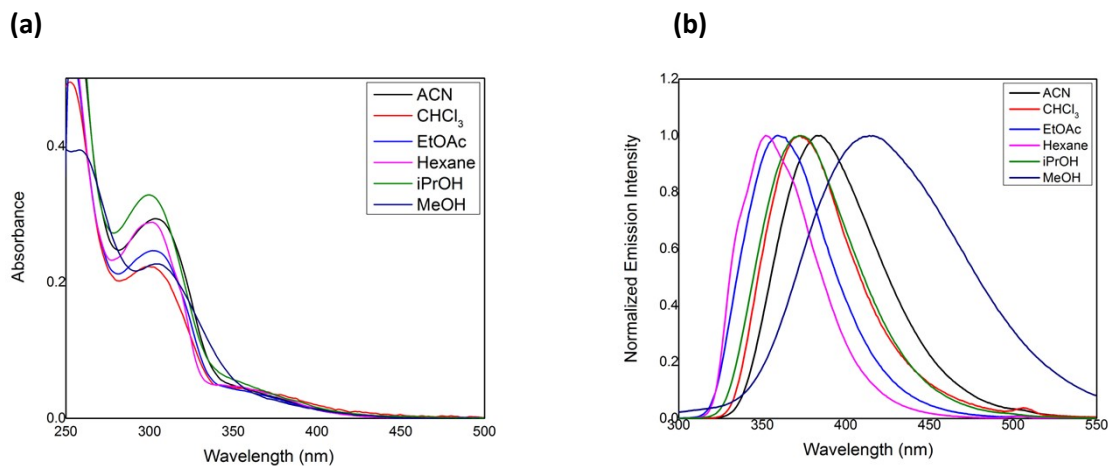

**Table-S1:** Photophysical data for 1-(4-Methoxyphenyl)-6-phenyl-1*H*-pyrrolo[3,2-*c*]pyridine (**5a**) in different solvents<sup>[a]</sup>

| Solvent       | Absorbance <sup>[b]</sup><br>$\lambda_{\max}$ (nm) | Emission<br>$\lambda_{\max}$ (nm) | Stokes Shift<br>$\nu$ (cm <sup>-1</sup> ) | $\epsilon$ (M <sup>-1</sup> CM <sup>-1</sup> ) |
|---------------|----------------------------------------------------|-----------------------------------|-------------------------------------------|------------------------------------------------|
| Hexane        | 301                                                | 350                               | 4651                                      | 28722                                          |
| Chloroform    | 301                                                | 372                               | 6677                                      | 22351                                          |
| 2-Propanol    | 301                                                | 377                               | 06340                                     | 33293                                          |
| Ethyl acetate | 304                                                | 369                               | 5794                                      | 24888                                          |
| Acetonitrile  | 305                                                | 383                               | 6697                                      | 29351                                          |
| Methanol      | 306                                                | 464                               | 11128                                     | 22962                                          |

[a] Measured in solvent ( $c = 1 \times 10^{-4}$  M) at 298 K. [b] Excited at 300 nm

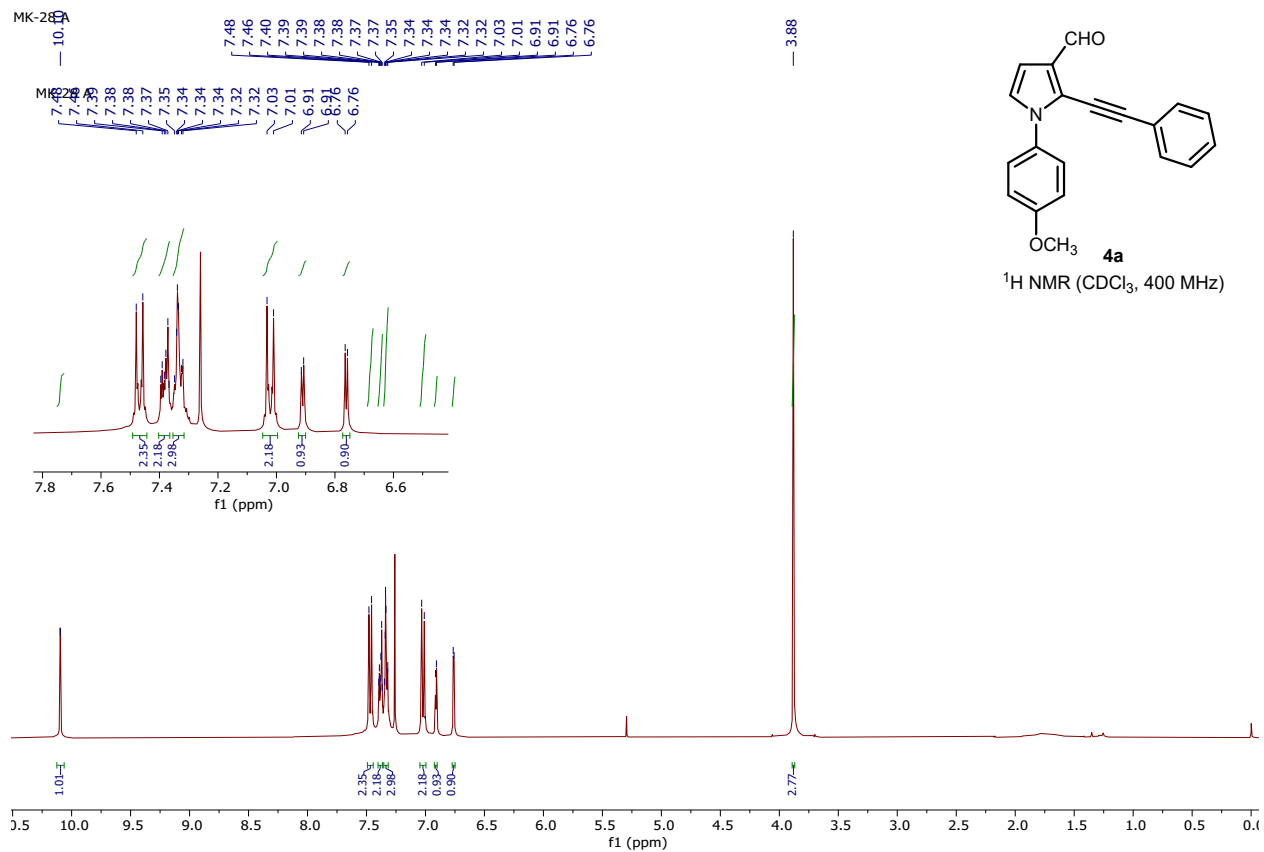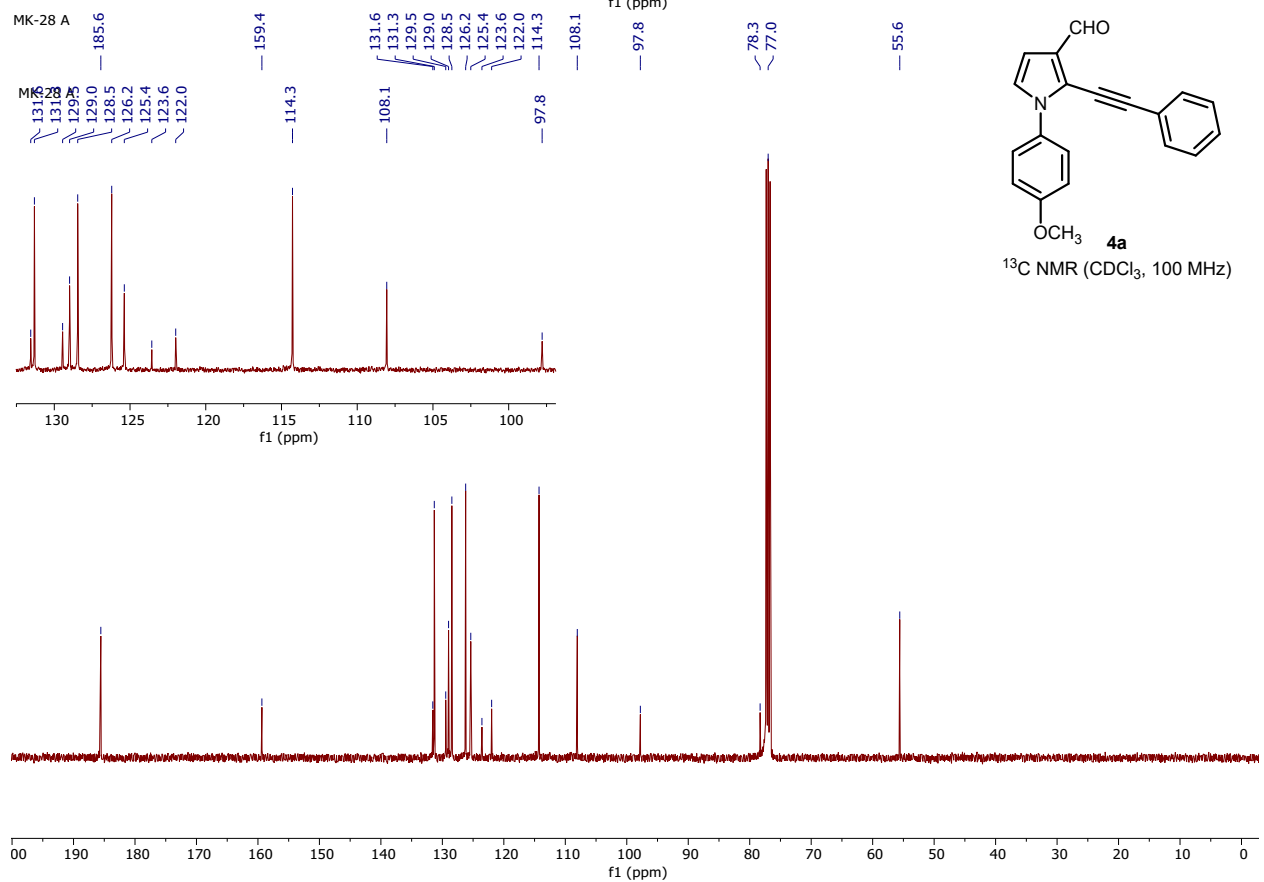

# Compound Report

|                        |                                          |               |                     |
|------------------------|------------------------------------------|---------------|---------------------|
| Data File              | 1.d                                      | Sample Name   | 1                   |
| Sample Type            | Sample                                   | Position      | P1-B1               |
| Instrument Name        | Instrument 1                             | User Name     |                     |
| Acq Method             | ChB60ChD40_isocratic_esi_positive_3min.m | Acquired Time | 5/7/2019 6:07:37 PM |
| IRM Calibration Status | Success                                  | DA Method     | PROCESSNEW.m        |
| Comment                |                                          |               |                     |

|              |      |                |                             |
|--------------|------|----------------|-----------------------------|
| Sample Group |      | Info.          |                             |
| Stream Name  | LC 1 | Acquisition SW | 6200 series TOF/6500 series |
|              |      | Version        | Q-TOF B.06.01 (B6172 SP1)   |

## Compound Table

| Compound Label        | RT    | Mass     | Abund  | Formula      | Tgt Mass | Diff (ppm) |
|-----------------------|-------|----------|--------|--------------|----------|------------|
| Cpd 1: 0.182 302.1180 | 0.182 | 301.1108 | 136512 | C20 H15 N O2 | 301.1103 | 1.63       |

| Compound Label        | m/z     | RT    | Algorithm       | Mass     |
|-----------------------|---------|-------|-----------------|----------|
| Cpd 1: 0.182 302.1180 | 302.118 | 0.182 | Find By Formula | 301.1108 |

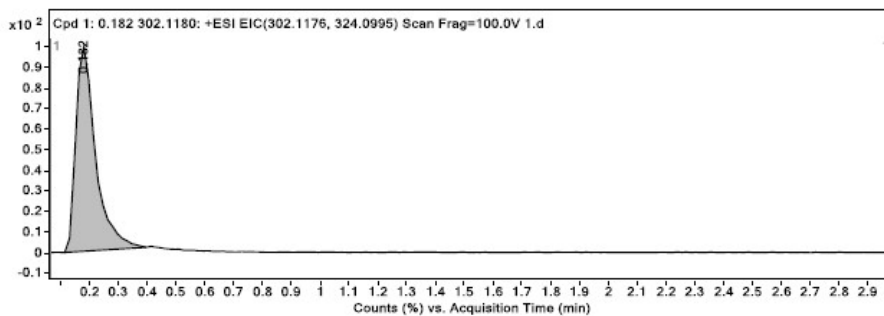

## MS Zoomed Spectrum

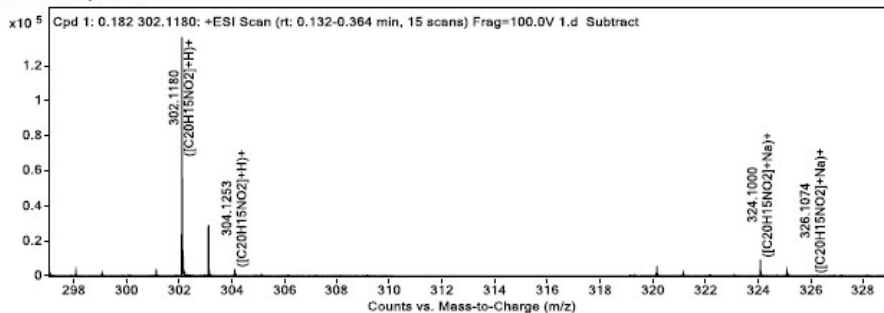

## MS Spectrum Peak List

| m/z      | Calc m/z | Diff(ppm) | z | Abund     | Formula   | Ion     |
|----------|----------|-----------|---|-----------|-----------|---------|
| 302.118  | 302.1176 | -1.43     | 1 | 136512.07 | C20H15NO2 | (M+H)+  |
| 303.1214 | 303.1208 | -1.83     | 1 | 29337.21  | C20H15NO2 | (M+H)+  |
| 304.1253 | 304.1238 | -5.12     | 1 | 3788.84   | C20H15NO2 | (M+H)+  |
| 305.1308 | 305.1265 | -14.01    | 1 | 412.62    | C20H15NO2 | (M+H)+  |
| 324.1    | 324.0995 | -1.7      | 1 | 9347.34   | C20H15NO2 | (M+Na)+ |
| 325.103  | 325.1028 | -0.68     | 1 | 2101.16   | C20H15NO2 | (M+Na)+ |
| 326.1074 | 326.1057 | -5.26     | 1 | 299.08    | C20H15NO2 | (M+Na)+ |

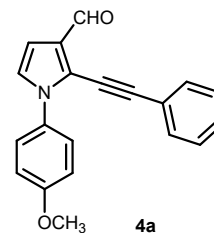

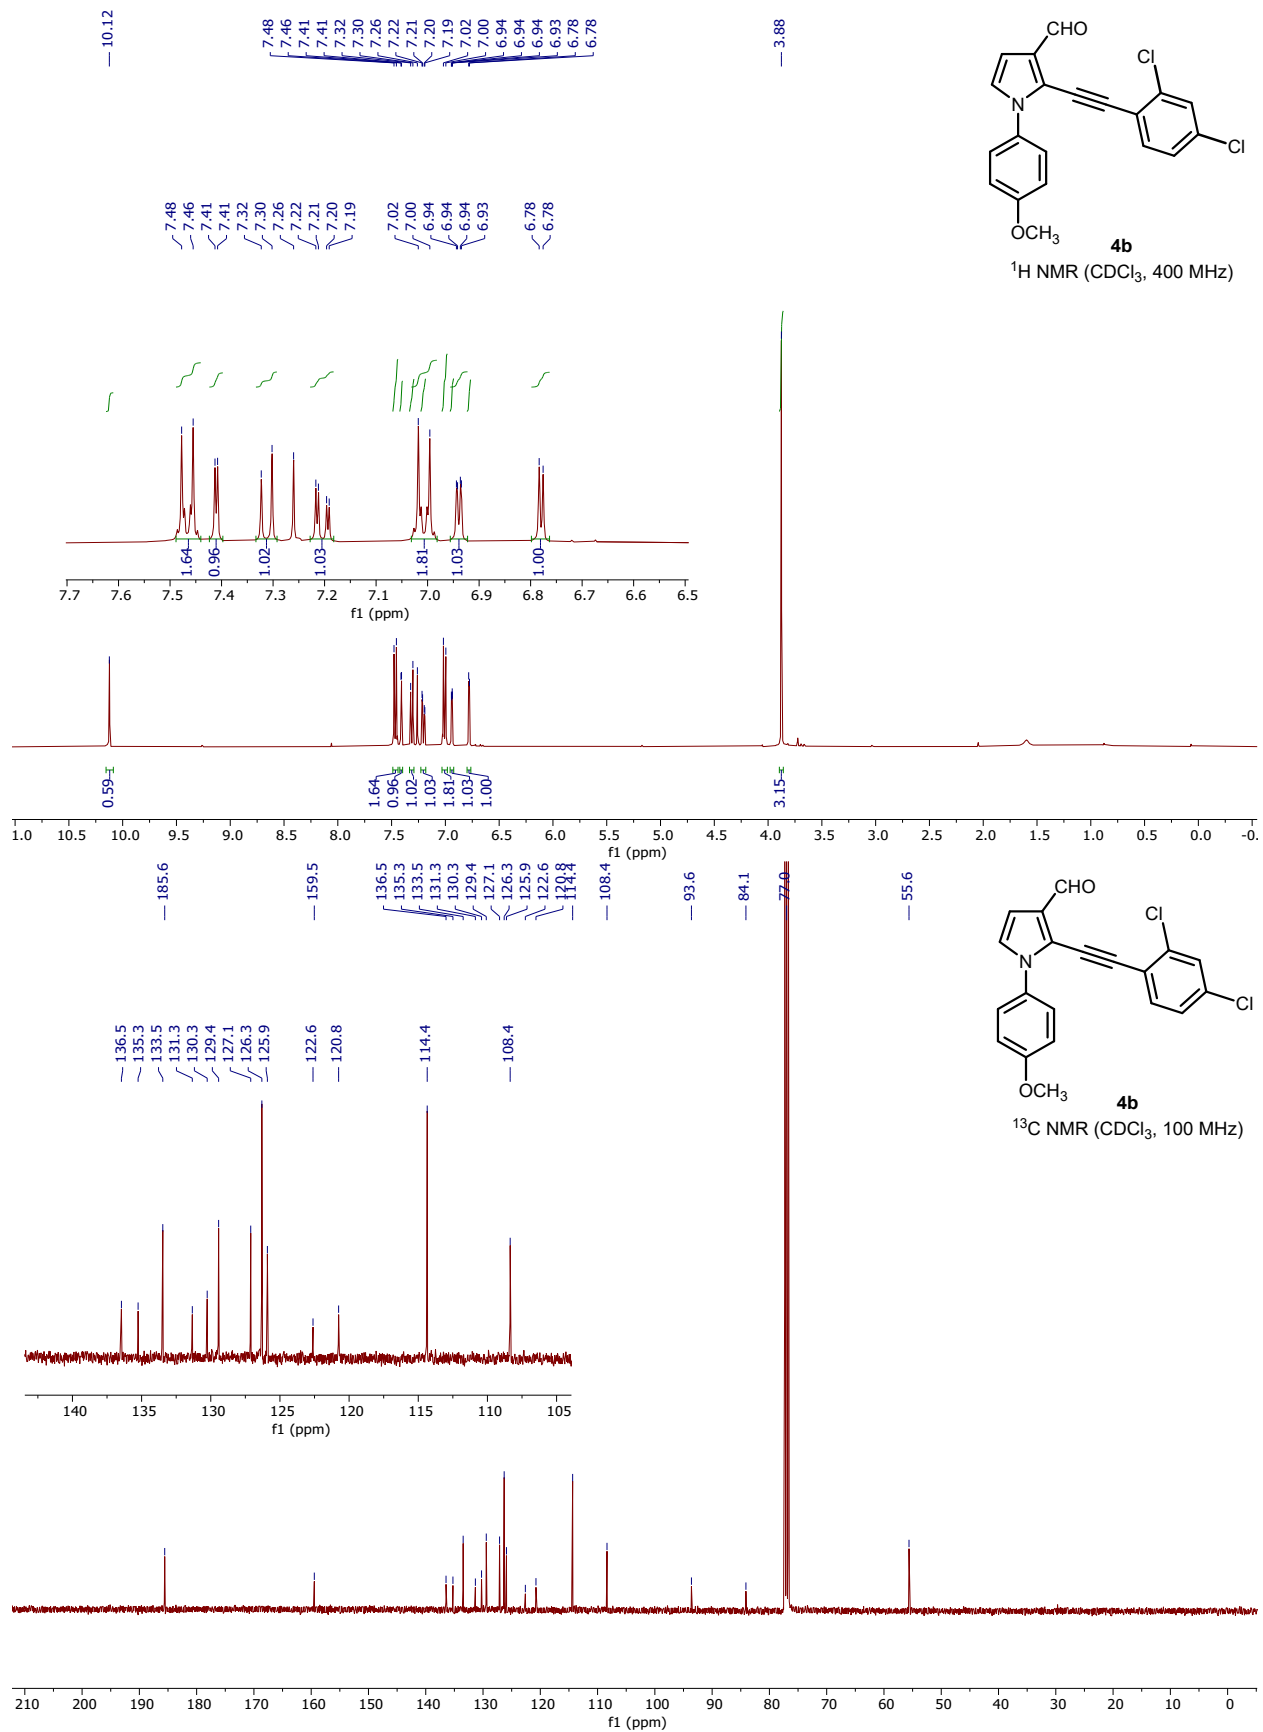

|                               |                                          |                      |                     |
|-------------------------------|------------------------------------------|----------------------|---------------------|
| <b>Data File</b>              | DACOME.d                                 | <b>Sample Name</b>   | DACOME              |
| <b>Sample Type</b>            | Sample                                   | <b>Position</b>      | P1-C9               |
| <b>Instrument Name</b>        | Instrument 1                             | <b>User Name</b>     |                     |
| <b>Acq Method</b>             | ChB60ChD40_isocratic_esi_positive_3min.m | <b>Acquired Time</b> | 5/8/2019 6:04:12 PM |
| <b>IRM Calibration Status</b> | Success                                  | <b>DA Method</b>     | PROCESSNEW.m        |
| <b>Comment</b>                |                                          |                      |                     |

|                     |      |                               |                                                       |
|---------------------|------|-------------------------------|-------------------------------------------------------|
| <b>Sample Group</b> |      | <b>Info.</b>                  |                                                       |
| <b>Stream Name</b>  | LC 1 | <b>Acquisition SW Version</b> | 6200 series TOF/6500 series Q-TOF B.06.01 (B6172 SP1) |

### Compound Table

| Compound Label        | RT    | Mass     | Abund | Formula          | Tgt Mass | Diff (ppm) |
|-----------------------|-------|----------|-------|------------------|----------|------------|
| Cpd 1: 0.166 610.1847 | 0.166 | 369.0326 | 732   | C20 H13 Cl2 N O2 | 369.0323 | 0.84       |

| Compound Label        | m/z      | RT    | Algorithm       | Mass     |
|-----------------------|----------|-------|-----------------|----------|
| Cpd 1: 0.166 610.1847 | 370.0399 | 0.166 | Find By Formula | 369.0326 |

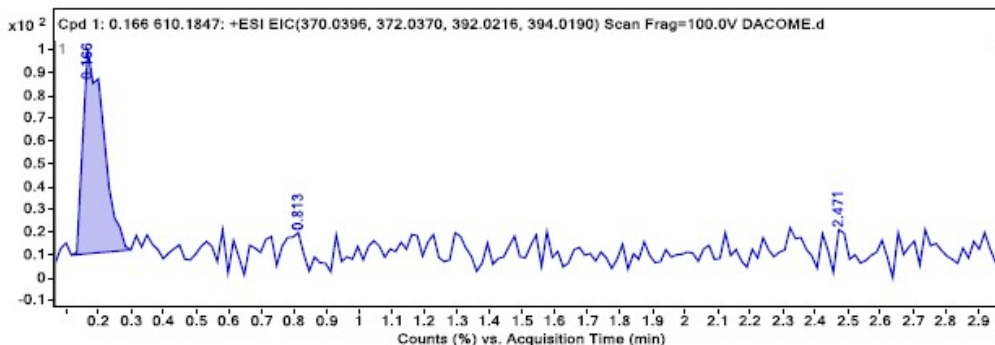

### MS Zoomed Spectrum

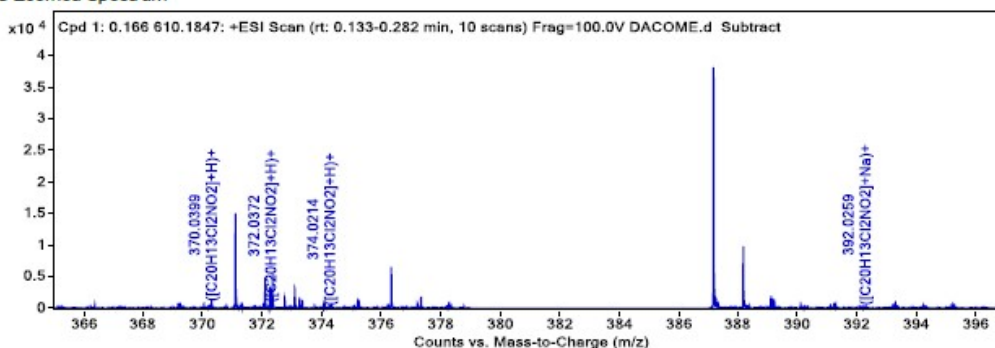

### MS Spectrum Peak List

| m/z      | Calc m/z | Diff(ppm) | z | Abund  | Formula      | Ion     |
|----------|----------|-----------|---|--------|--------------|---------|
| 370.0399 | 370.0396 | -0.84     | 1 | 731.9  | C20H13Cl2NO2 | (M+H)+  |
| 371.0463 | 371.0429 | -9.33     | 1 | 247.46 | C20H13Cl2NO2 | (M+H)+  |
| 372.0372 | 372.037  | -0.43     | 1 | 597.72 | C20H13Cl2NO2 | (M+H)+  |
| 373.0394 | 373.0401 | 1.73      | 1 | 212.29 | C20H13Cl2NO2 | (M+H)+  |
| 374.0214 | 374.0351 | 36.55     | 1 | 71.2   | C20H13Cl2NO2 | (M+H)+  |
| 392.0259 | 392.0216 | -11.13    | 1 | 125.64 | C20H13Cl2NO2 | (M+Na)+ |

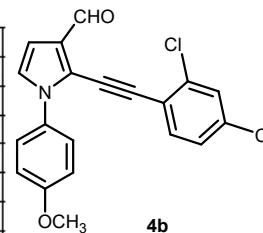

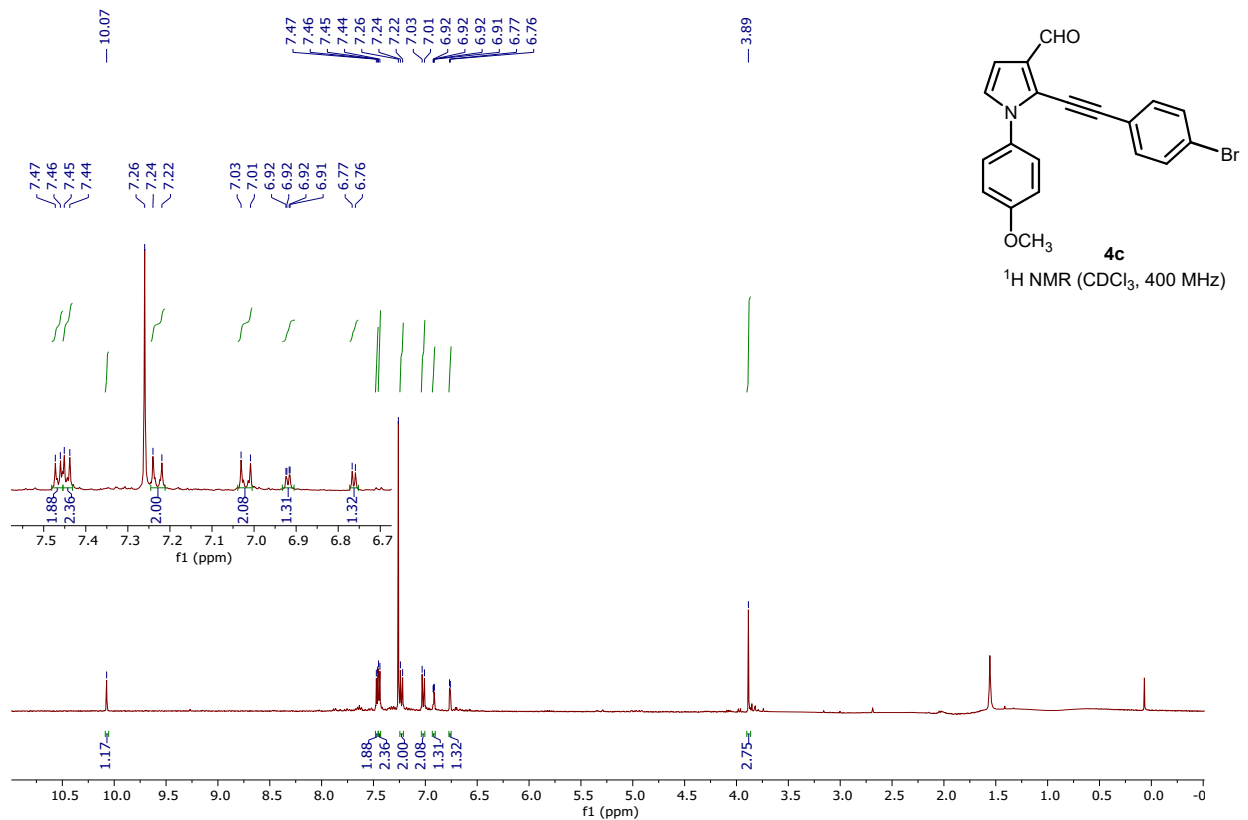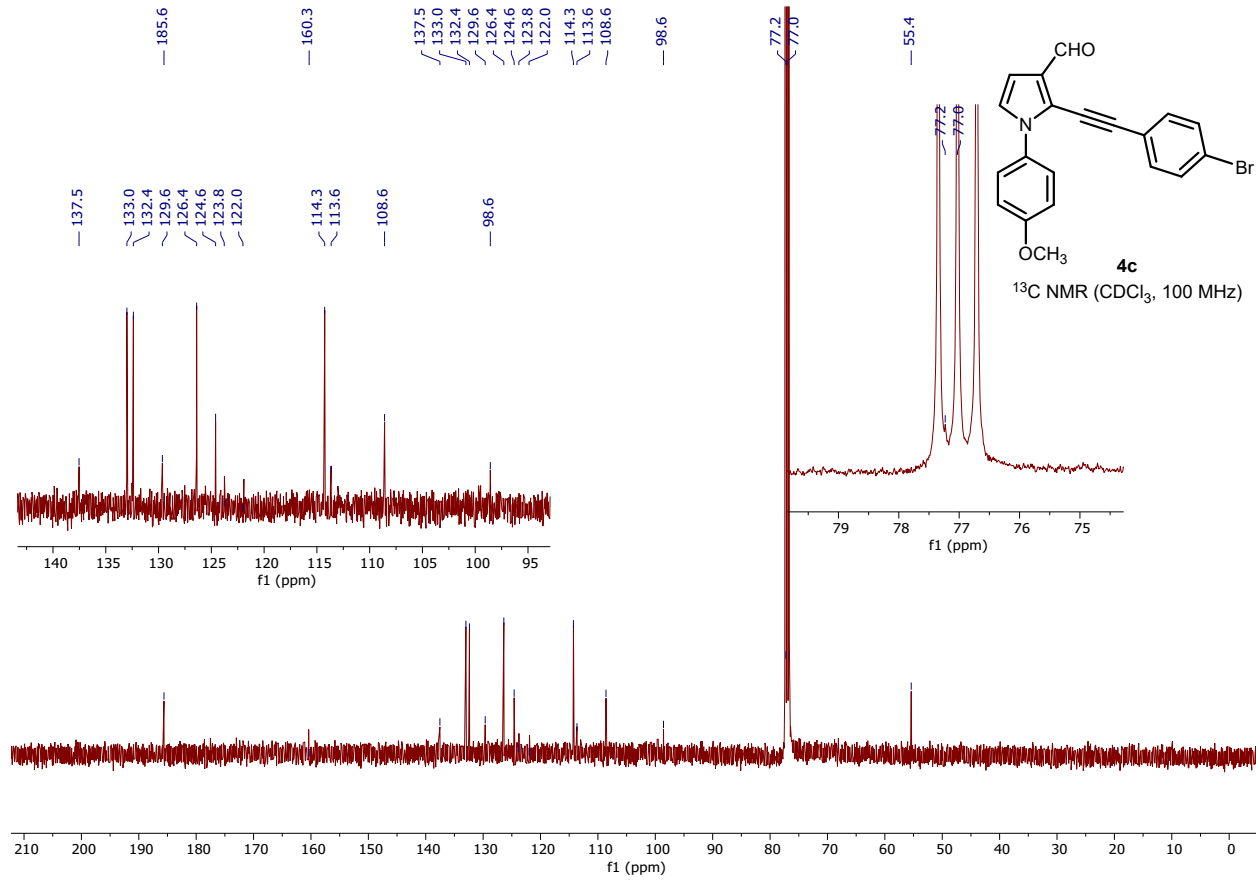

|                               |                                          |                      |                     |
|-------------------------------|------------------------------------------|----------------------|---------------------|
| <b>Sample Type</b>            | Sample                                   | <b>Position</b>      | P1-C6               |
| <b>Instrument Name</b>        | Instrument 1                             | <b>User Name</b>     |                     |
| <b>Acq Method</b>             | ChB60ChD40_isocratic_esi_positive_3min.m | <b>Acquired Time</b> | 5/8/2019 5:39:10 PM |
| <b>IRM Calibration Status</b> | Success                                  | <b>DA Method</b>     | PROCESSNEW.m        |
| <b>Comment</b>                |                                          |                      |                     |

|                     |      |                               |                                                       |
|---------------------|------|-------------------------------|-------------------------------------------------------|
| <b>Sample Group</b> |      | <b>Info.</b>                  |                                                       |
| <b>Stream Name</b>  | LC 1 | <b>Acquisition SW Version</b> | 6200 series TOF/6500 series Q-TOF B.06.01 (B6172 SP1) |

### Compound Table

| Compound Label        | RT   | Mass     | Abund | Formula         | Tgt Mass | Diff (ppm) |
|-----------------------|------|----------|-------|-----------------|----------|------------|
| Cpd 1: 0.180 331.2840 | 0.18 | 379.0203 | 15341 | C20 H14 Br N O2 | 379.0208 | -1.25      |

| Compound Label        | m/z      | RT   | Algorithm       | Mass     |
|-----------------------|----------|------|-----------------|----------|
| Cpd 1: 0.180 331.2840 | 380.0276 | 0.18 | Find By Formula | 379.0203 |

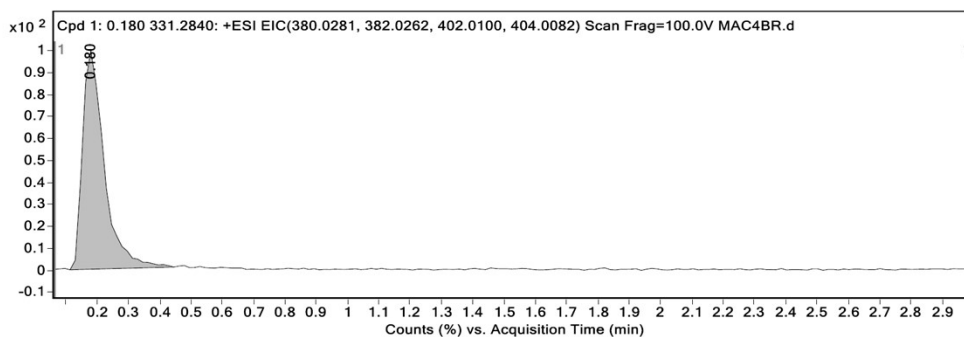

### MS Zoomed Spectrum

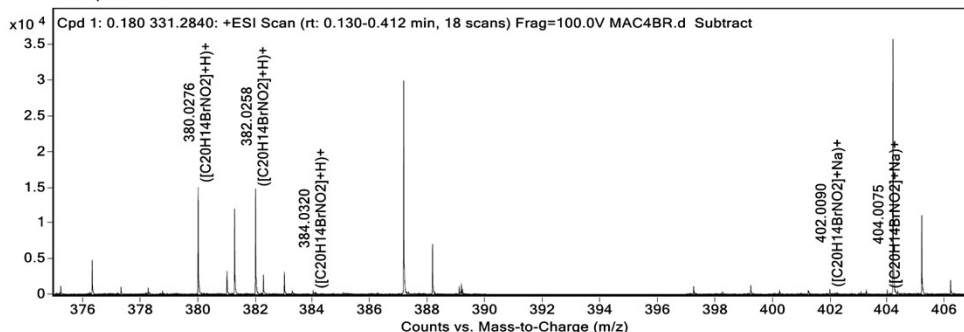

### MS Spectrum Peak List

| m/z      | Calc m/z | Diff(ppm) | z | Abund    | Formula     | Ion     |
|----------|----------|-----------|---|----------|-------------|---------|
| 380.0276 | 380.0281 | 1.33      | 1 | 15341.27 | C20H14BrNO2 | (M+H)+  |
| 381.0312 | 381.0313 | 0.38      | 1 | 3314.55  | C20H14BrNO2 | (M+H)+  |
| 382.0258 | 382.0262 | 1.19      | 1 | 14791.64 | C20H14BrNO2 | (M+H)+  |
| 383.0291 | 383.0294 | 0.74      | 1 | 3153.12  | C20H14BrNO2 | (M+H)+  |
| 384.032  | 384.0323 | 0.63      | 1 | 506.2    | C20H14BrNO2 | (M+H)+  |
| 385.0324 | 385.035  | 6.8       | 1 | 72.76    | C20H14BrNO2 | (M+H)+  |
| 402.009  | 402.01   | 2.43      | 1 | 710.08   | C20H14BrNO2 | (M+Na)+ |
| 403.0116 | 403.0133 | 4.13      | 1 | 159.41   | C20H14BrNO2 | (M+Na)+ |
| 404.0075 | 404.0082 | 1.67      | 1 | 516.49   | C20H14BrNO2 | (M+Na)+ |
| 404.9993 | 405.0113 | 29.8      | 1 | 58.03    | C20H14BrNO2 | (M+Na)+ |

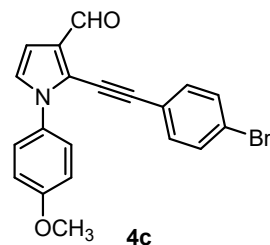



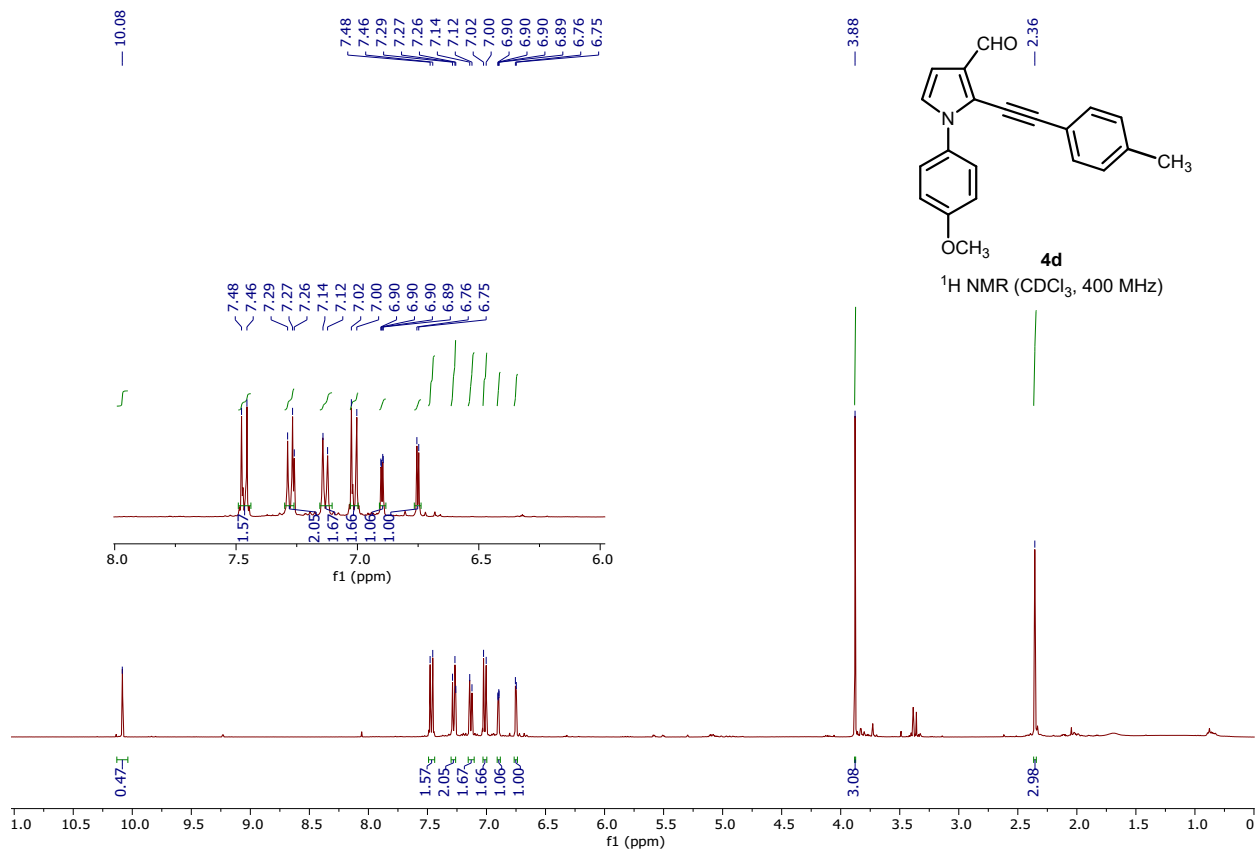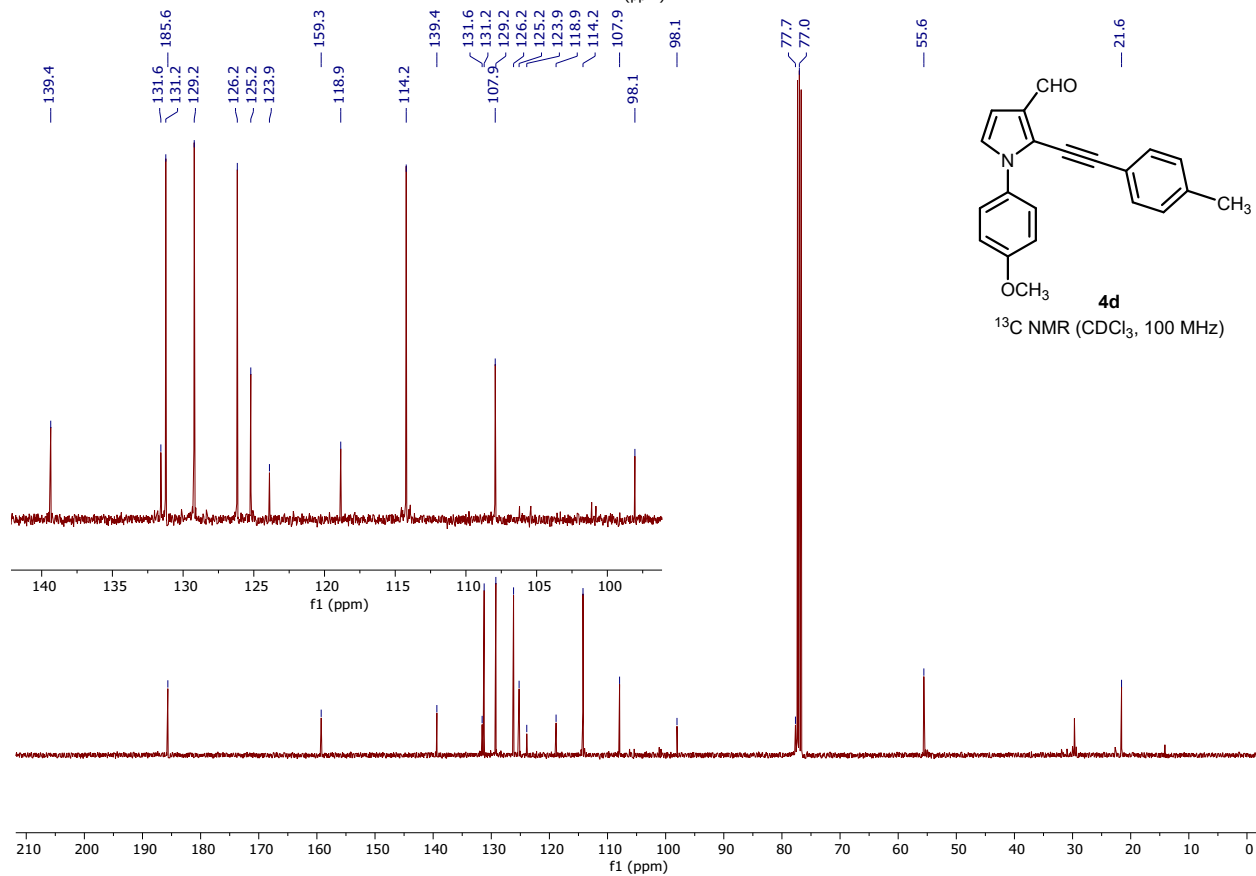

|                        |                                          |               |                     |
|------------------------|------------------------------------------|---------------|---------------------|
| Data File              | 3.d                                      | Sample Name   | 3                   |
| Sample Type            | Sample                                   | Position      | P1-B3               |
| Instrument Name        | Instrument 1                             | User Name     |                     |
| Acq Method             | ChB60ChD40_isocratic_esi_positive_3min.m | Acquired Time | 5/7/2019 6:24:17 PM |
| IRM Calibration Status | Success                                  | DA Method     | PROCESSNEW.m        |
| Comment                |                                          |               |                     |

|              |      |                |                             |
|--------------|------|----------------|-----------------------------|
| Sample Group |      | Info.          |                             |
| Stream Name  | LC 1 | Acquisition SW | 6200 series TOF/6500 series |
|              |      | Version        | Q-TOF B.06.01 (B6172 SP1)   |

### Compound Table

| Compound Label        | RT    | Mass     | Abund | Formula      | Tgt Mass | Diff (ppm) |
|-----------------------|-------|----------|-------|--------------|----------|------------|
| Cpd 1: 0.171 316.1337 | 0.171 | 315.1265 | 11328 | C21 H17 N O2 | 315.1259 | 1.79       |

| Compound Label        | m/z      | RT    | Algorithm       | Mass     |
|-----------------------|----------|-------|-----------------|----------|
| Cpd 1: 0.171 316.1337 | 338.1157 | 0.171 | Find By Formula | 315.1265 |

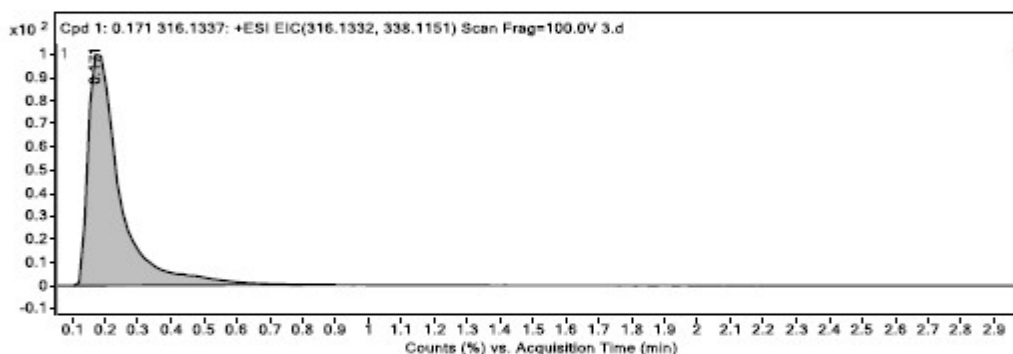

### MS Zoomed Spectrum

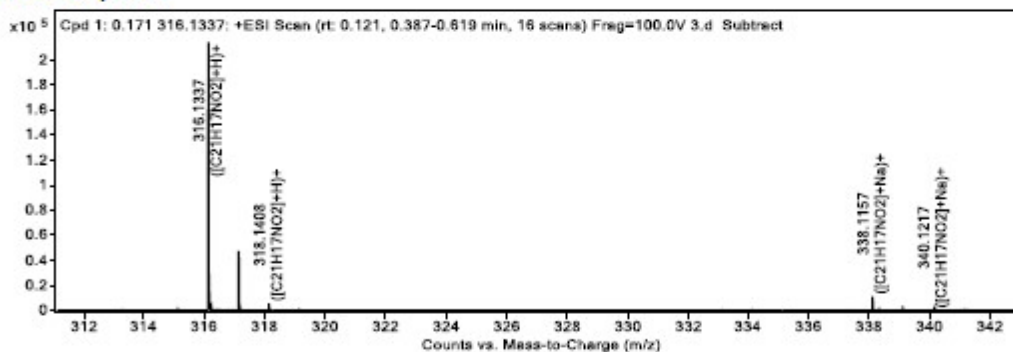

### MS Spectrum Peak List

| m/z      | Calc m/z | Diff(ppm) | z | Abund     | Formula   | Ion     |
|----------|----------|-----------|---|-----------|-----------|---------|
| 316.1337 | 316.1332 | -1.68     | 1 | 214712.72 | C21H17NO2 | (M+H)+  |
| 317.1371 | 317.1365 | -1.93     | 1 | 47966.8   | C21H17NO2 | (M+H)+  |
| 318.1408 | 318.1395 | -4.2      | 1 | 5779.13   | C21H17NO2 | (M+H)+  |
| 319.1435 | 319.1423 | -3.92     | 1 | 587.35    | C21H17NO2 | (M+H)+  |
| 338.1157 | 338.1151 | -1.55     | 1 | 11328.28  | C21H17NO2 | (M+Na)+ |
| 339.1191 | 339.1184 | -1.86     | 1 | 2628.92   | C21H17NO2 | (M+Na)+ |
| 340.1217 | 340.1214 | -1.01     | 1 | 322.06    | C21H17NO2 | (M+Na)+ |

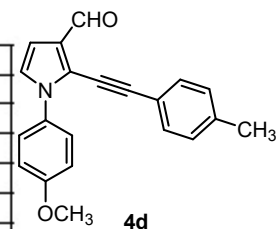

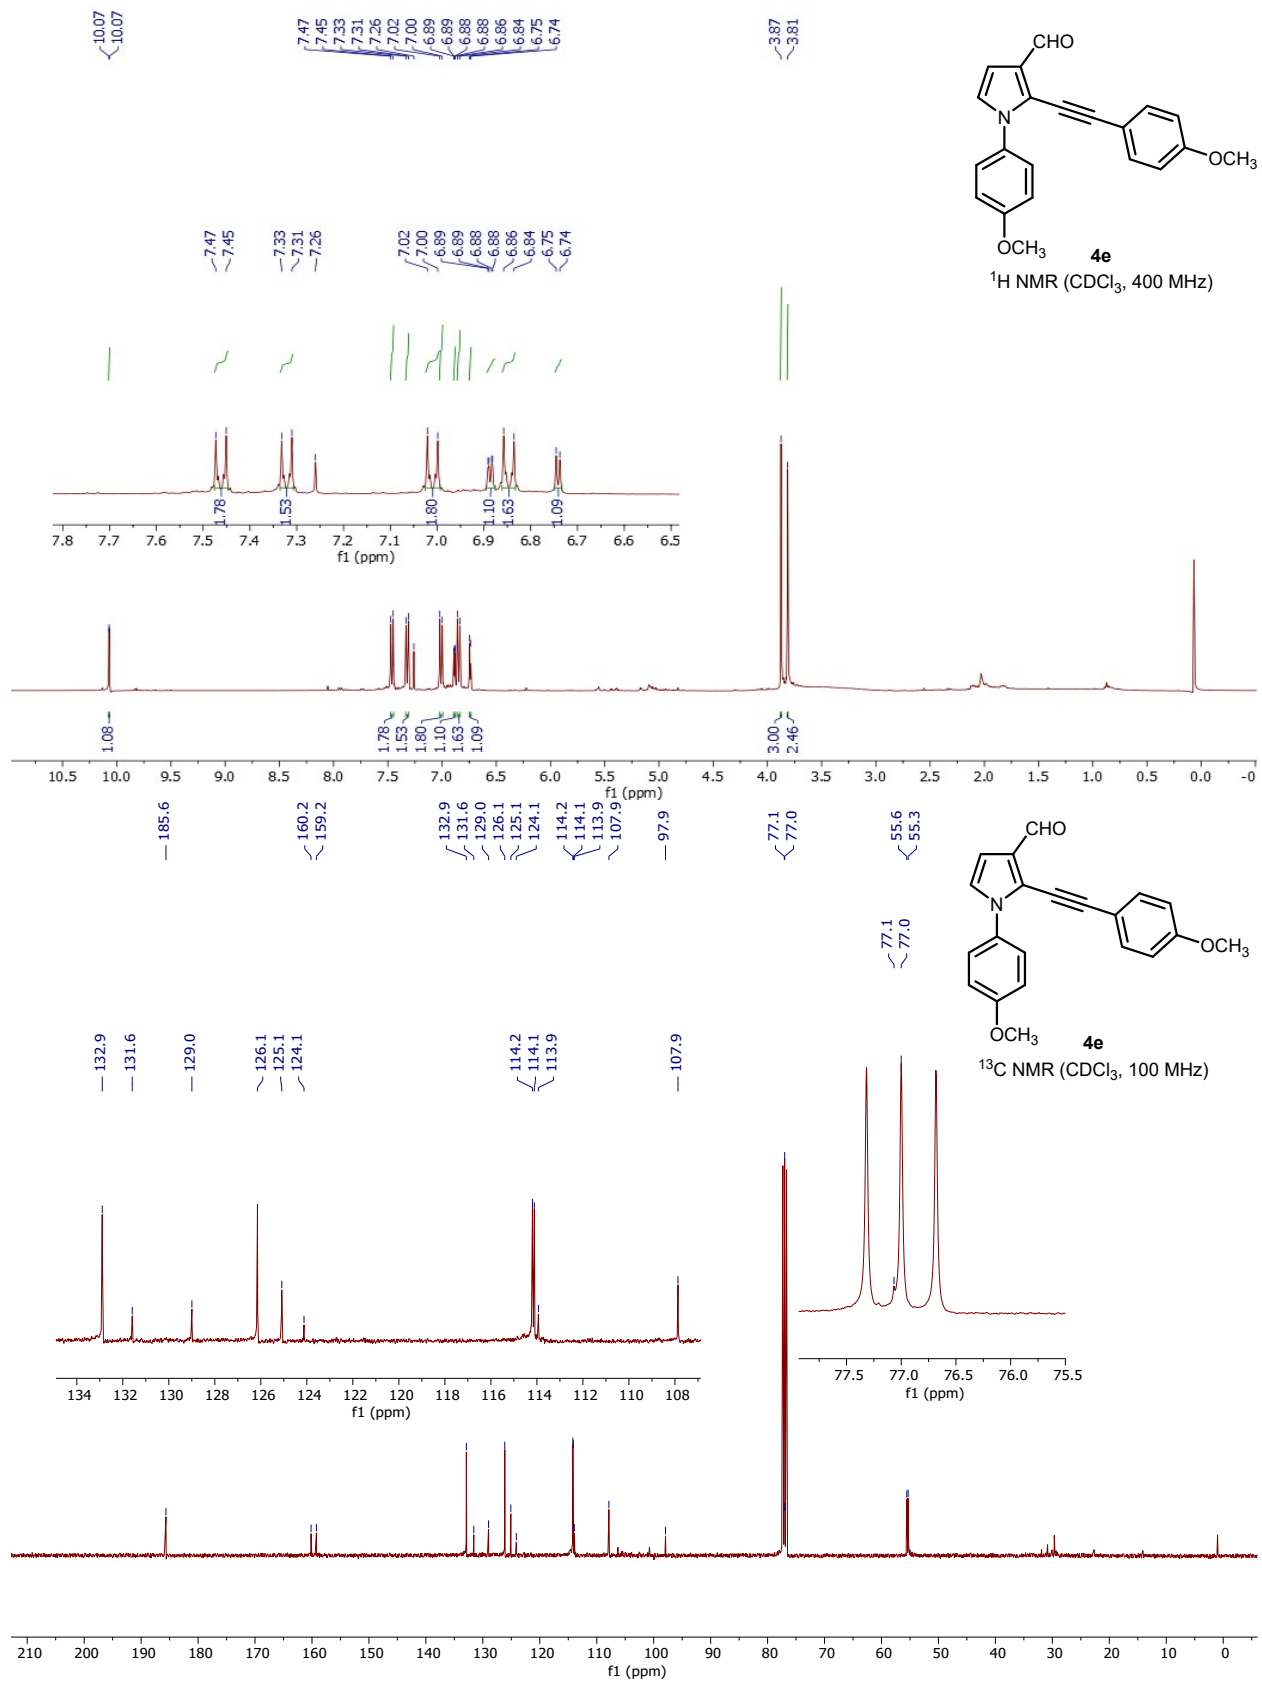

|                               |                                          |                      |                     |
|-------------------------------|------------------------------------------|----------------------|---------------------|
| <b>Data File</b>              | MACOME.d                                 | <b>Sample Name</b>   | MACOME              |
| <b>Sample Type</b>            | Sample                                   | <b>Position</b>      | P1-B10              |
| <b>Instrument Name</b>        | Instrument 1                             | <b>User Name</b>     |                     |
| <b>Acq Method</b>             | ChB60ChD40_isocratic_esi_positive_3min.m | <b>Acquired Time</b> | 5/8/2019 5:22:28 PM |
| <b>IRM Calibration Status</b> | Success                                  | <b>DA Method</b>     | PROCESSNEW.m        |
| <b>Comment</b>                |                                          |                      |                     |

|                     |      |                               |                                                       |
|---------------------|------|-------------------------------|-------------------------------------------------------|
| <b>Sample Group</b> |      | <b>Info.</b>                  |                                                       |
| <b>Stream Name</b>  | LC 1 | <b>Acquisition SW Version</b> | 6200 series TOF/6500 series Q-TOF B.06.01 (B6172 SP1) |

### Compound Table

| Compound Label        | RT    | Mass     | Abund | Formula      | Tgt Mass | Diff (ppm) |
|-----------------------|-------|----------|-------|--------------|----------|------------|
| Cpd 1: 0.183 331.2839 | 0.183 | 331.1204 | 8926  | C21 H17 N O3 | 331.1208 | -1.38      |

| Compound Label        | m/z      | RT    | Algorithm       | Mass     |
|-----------------------|----------|-------|-----------------|----------|
| Cpd 1: 0.183 331.2839 | 332.1276 | 0.183 | Find By Formula | 331.1204 |

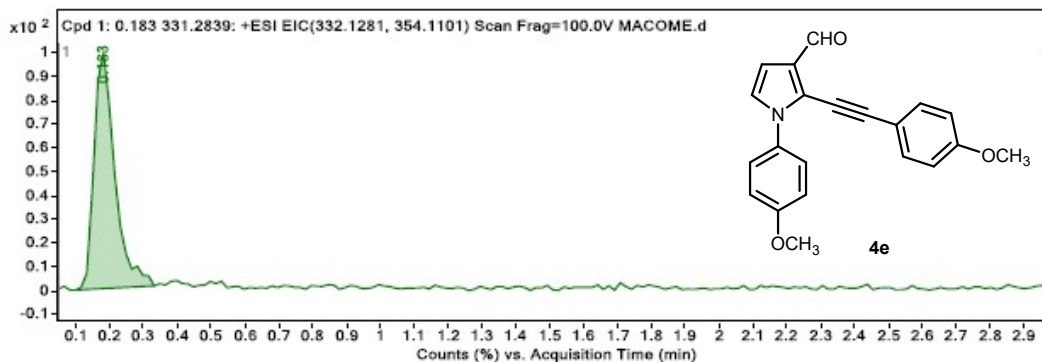

### MS Zoomed Spectrum

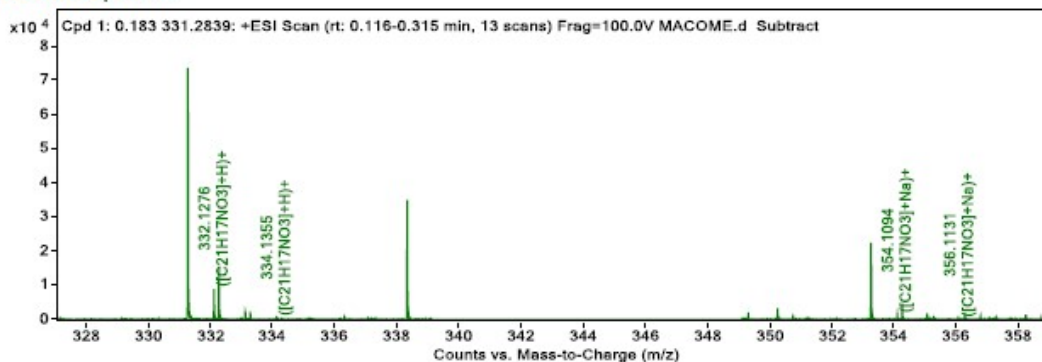

### MS Spectrum Peak List

| m/z      | Calc m/z | Diff(ppm) | z | Abund   | Formula   | Ion     |
|----------|----------|-----------|---|---------|-----------|---------|
| 332.1276 | 332.1281 | 1.49      | 1 | 8925.76 | C21H17NO3 | (M+H)+  |
| 333.1307 | 333.1314 | 2.1       | 1 | 2130.65 | C21H17NO3 | (M+H)+  |
| 334.1355 | 334.1342 | -3.85     | 1 | 425.85  | C21H17NO3 | (M+H)+  |
| 354.1094 | 354.1101 | 1.79      | 1 | 1308.26 | C21H17NO3 | (M+Na)+ |
| 355.1141 | 355.1133 | -2.22     | 1 | 394.72  | C21H17NO3 | (M+Na)+ |
| 356.1131 | 356.1162 | 8.55      | 1 | 52.77   | C21H17NO3 | (M+Na)+ |

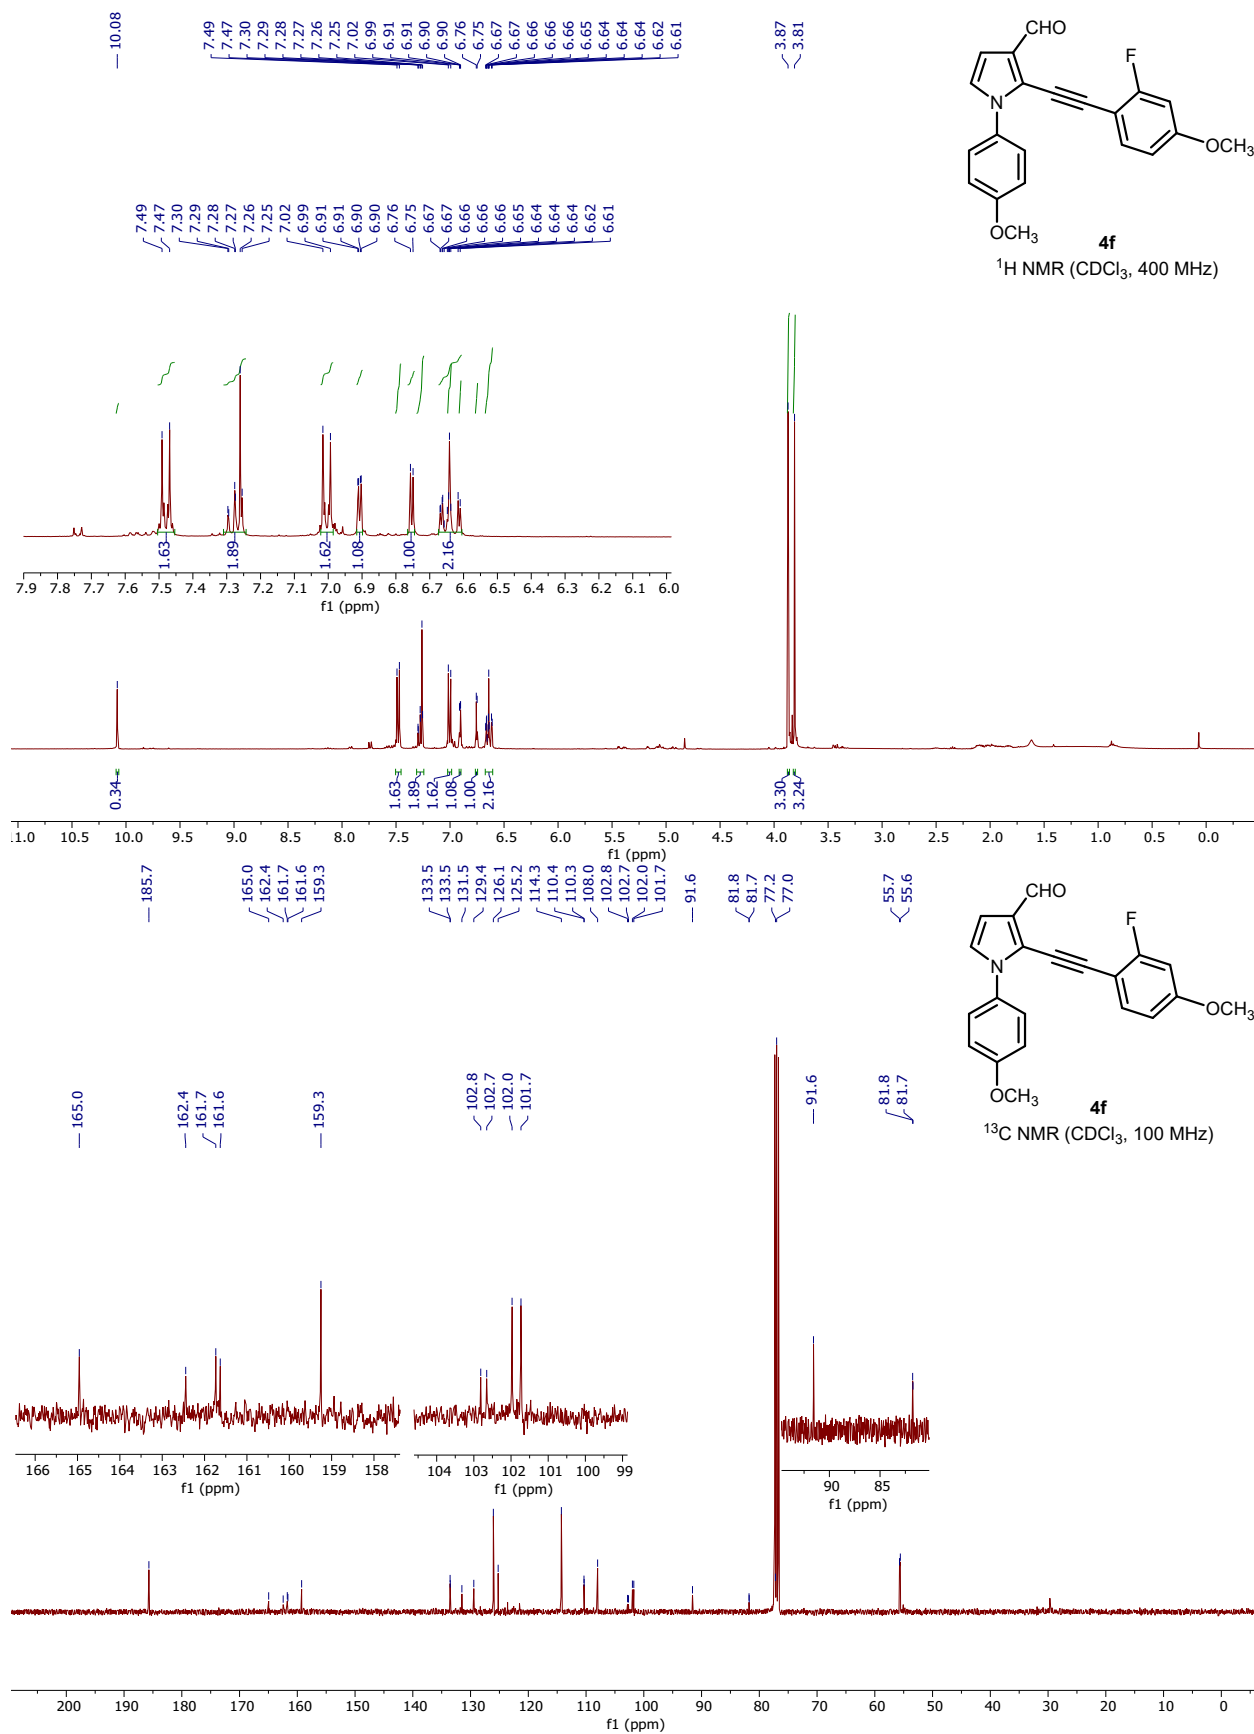

|                               |                                                |                      |                      |
|-------------------------------|------------------------------------------------|----------------------|----------------------|
| <b>Data File</b>              | FACOME.d                                       | <b>Sample Name</b>   | FACOME               |
| <b>Sample Type</b>            | Sample                                         | <b>Position</b>      | P2-A5                |
| <b>Instrument Name</b>        | Instrument 1                                   | <b>User Name</b>     |                      |
| <b>Acq Method</b>             | ChB60ChD40_isocratic_esi_positive_3min.bintu.m | <b>Acquired Time</b> | 6/21/2019 5:17:20 PM |
| <b>IRM Calibration Status</b> | Success                                        | <b>DA Method</b>     | PROCESSNEW.m         |
| <b>Comment</b>                |                                                |                      |                      |

|                     |      |                       |                             |
|---------------------|------|-----------------------|-----------------------------|
| <b>Sample Group</b> |      | <b>Info.</b>          |                             |
| <b>Stream Name</b>  | LC 1 | <b>Acquisition SW</b> | 6200 series TOF/6500 series |
|                     |      | <b>Version</b>        | Q-TOF B.06.01 (B6172 SP1)   |

#### Compound Table

| Compound Label        | RT    | Mass     | Abund | Formula        | Tgt Mass | Diff (ppm) |
|-----------------------|-------|----------|-------|----------------|----------|------------|
| Cpd 1: 2.569 350.1175 | 2.569 | 349.1102 | 55324 | C21 H16 F N O3 | 349.1114 | -3.51      |

| Compound Label        | m/z      | RT    | Algorithm       | Mass     |
|-----------------------|----------|-------|-----------------|----------|
| Cpd 1: 2.569 350.1175 | 350.1175 | 2.569 | Find By Formula | 349.1102 |

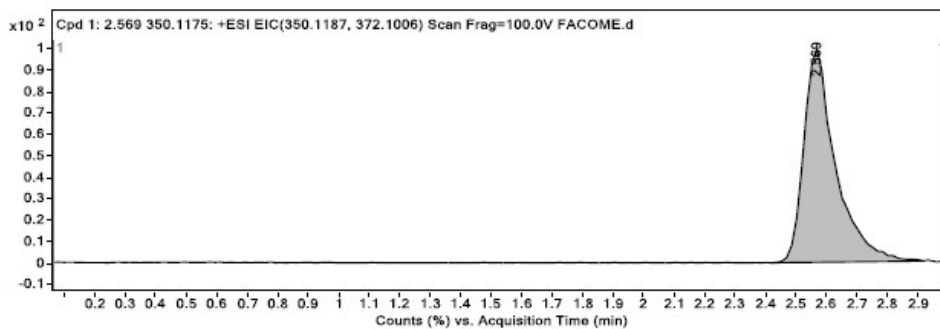

#### MS Zoomed Spectrum

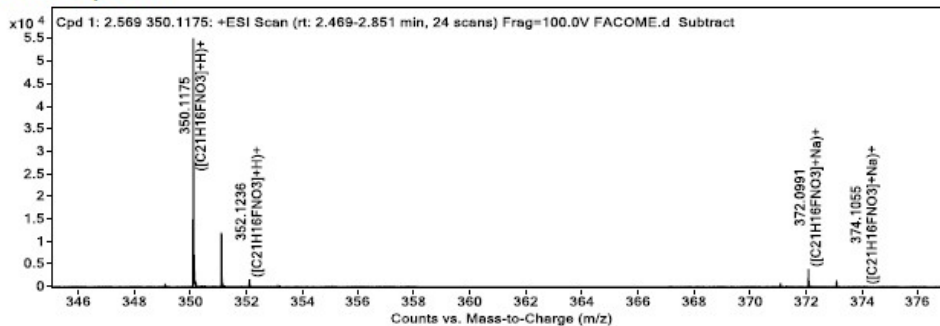

#### MS Spectrum Peak List

| m/z      | Calc m/z | Diff(ppm) | z | Abund    | Formula    | Ion     |
|----------|----------|-----------|---|----------|------------|---------|
| 350.1175 | 350.1187 | 3.5       | 1 | 55324.09 | C21H16FNO3 | (M+H)+  |
| 351.1209 | 351.122  | 3.17      | 1 | 12154.92 | C21H16FNO3 | (M+H)+  |
| 352.1236 | 352.1248 | 3.48      | 1 | 1623.58  | C21H16FNO3 | (M+H)+  |
| 353.1268 | 353.1275 | 2.01      | 1 | 176.22   | C21H16FNO3 | (M+H)+  |
| 372.0991 | 372.1006 | 4.04      | 1 | 3963.76  | C21H16FNO3 | (M+Na)+ |
| 373.1023 | 373.1039 | 4.46      | 1 | 1005     | C21H16FNO3 | (M+Na)+ |
| 374.1055 | 374.1068 | 3.32      | 1 | 98.82    | C21H16FNO3 | (M+Na)+ |

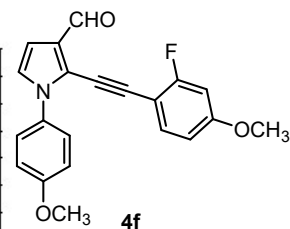

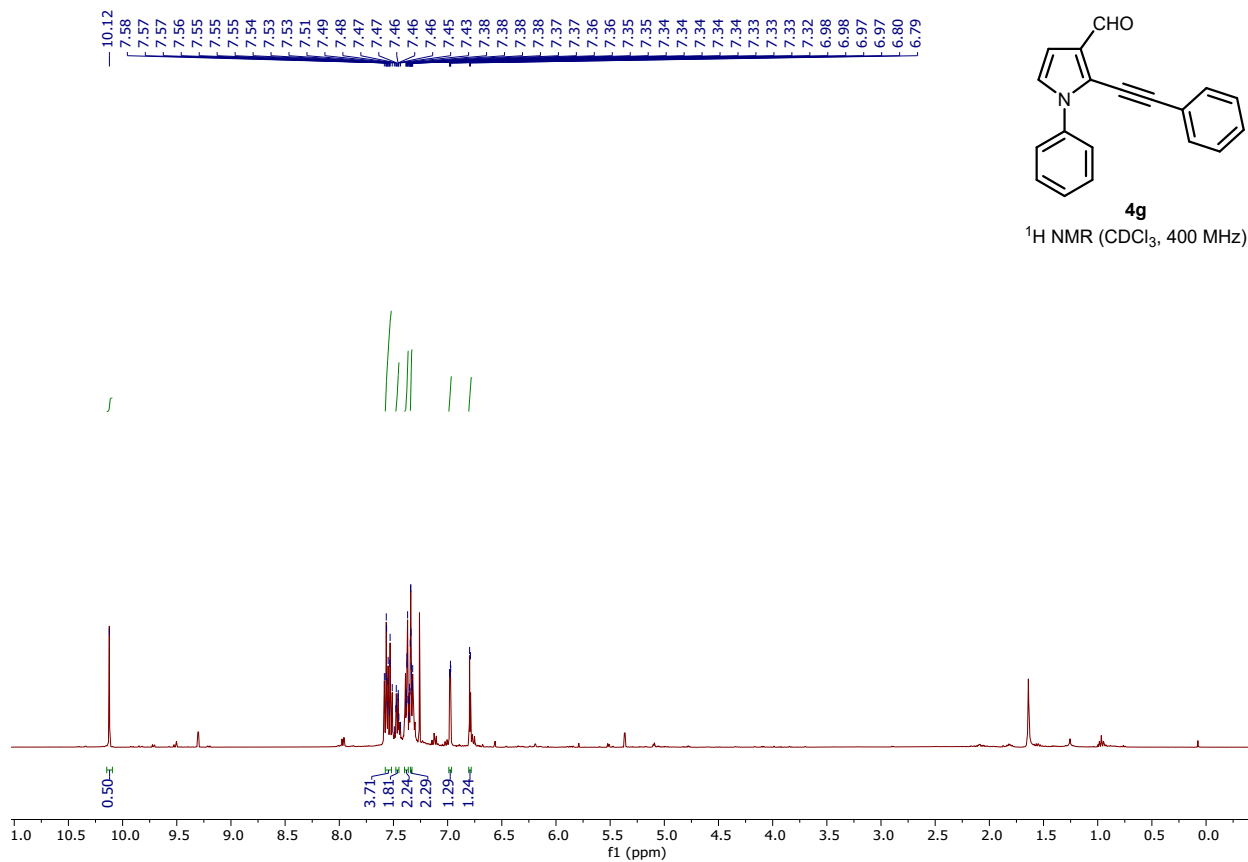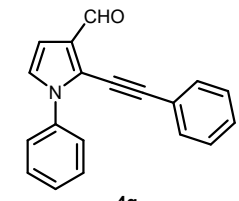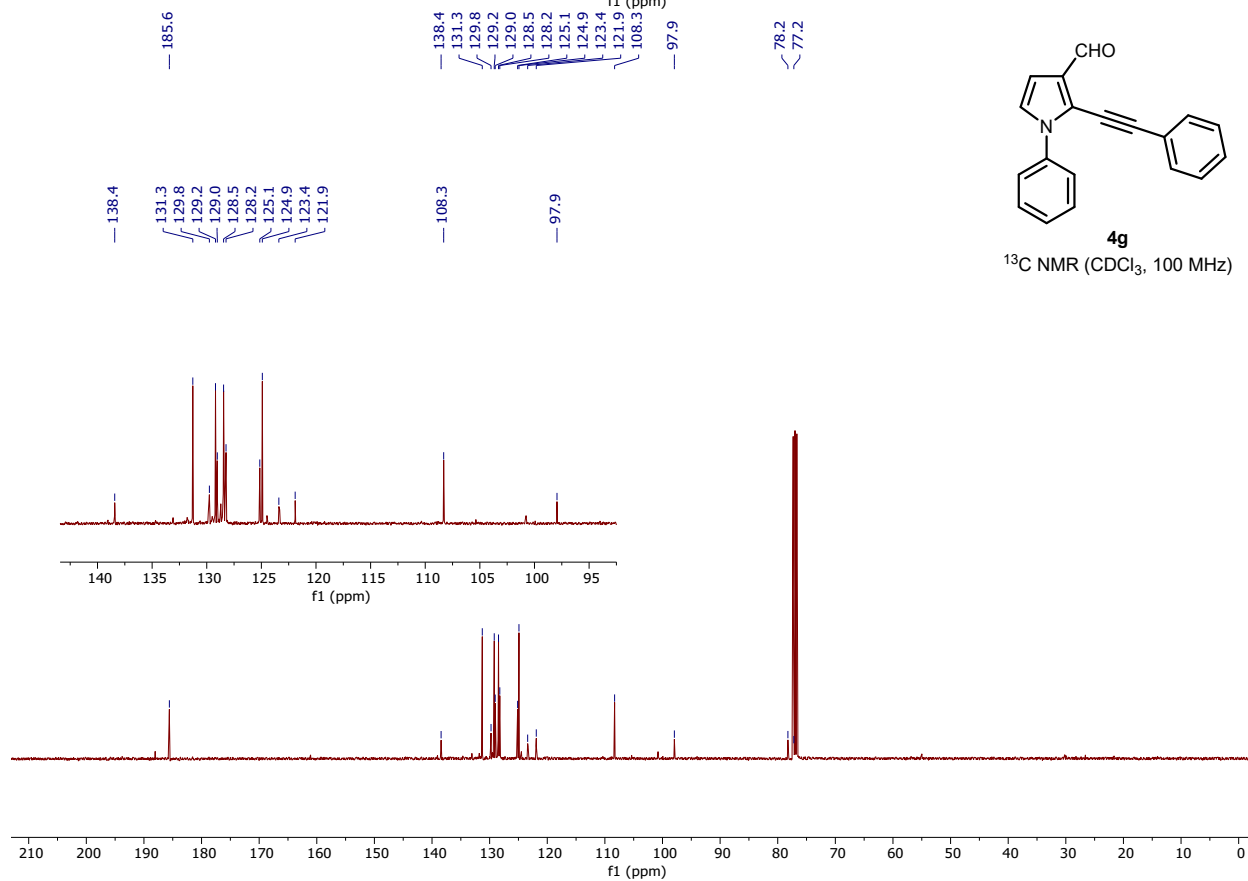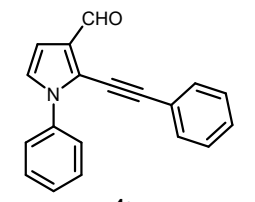

|                        |                                          |               |                     |
|------------------------|------------------------------------------|---------------|---------------------|
| Data File              | 7.d                                      | Sample Name   | 7                   |
| Sample Type            | Sample                                   | Position      | P1-B7               |
| Instrument Name        | Instrument 1                             | User Name     |                     |
| Acq Method             | ChB60ChD40_isocratic_esi_positive_3min.m | Acquired Time | 5/7/2019 6:57:39 PM |
| IRM Calibration Status | Success                                  | DA Method     | PROCESSNEW.m        |
| Comment                |                                          |               |                     |

|              |      |                |                             |
|--------------|------|----------------|-----------------------------|
| Sample Group |      | Info.          |                             |
| Stream Name  | LC 1 | Acquisition SW | 6200 series TOF/6500 series |
|              |      | Version        | Q-TOF B.06.01 (B6172 SP1)   |

### Compound Table

| Compound Label        | RT    | Mass     | Abund | Formula     | Tgt Mass | Diff (ppm) |
|-----------------------|-------|----------|-------|-------------|----------|------------|
| Cpd 1: 0.175 272.1071 | 0.175 | 271.0999 | 79040 | C19 H13 N O | 271.0997 | 0.59       |

| Compound Label        | m/z      | RT    | Algorithm       | Mass     |
|-----------------------|----------|-------|-----------------|----------|
| Cpd 1: 0.175 272.1071 | 272.1071 | 0.175 | Find By Formula | 271.0999 |

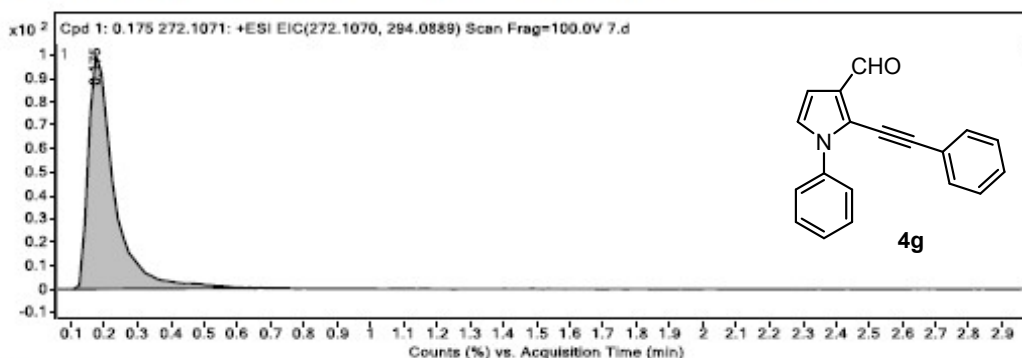

### MS Zoomed Spectrum

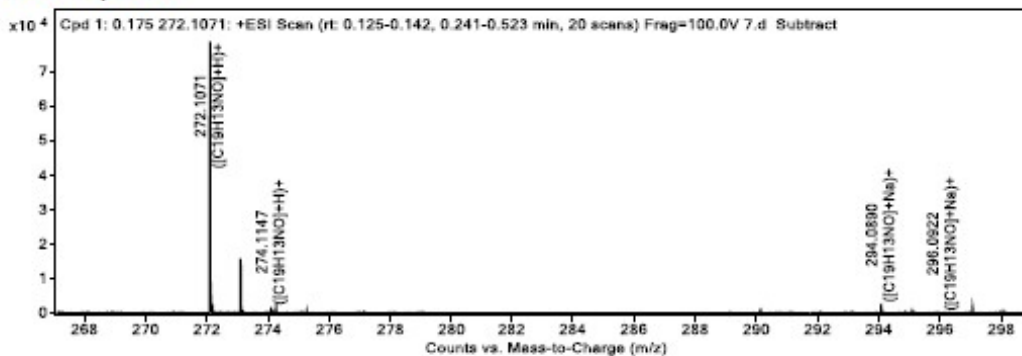

### MS Spectrum Peak List

| m/z      | Calc m/z | Diff(ppm) | z | Abund    | Formula  | Ion     |
|----------|----------|-----------|---|----------|----------|---------|
| 272.1071 | 272.107  | -0.46     | 1 | 79039.51 | C19H13NO | (M+H)+  |
| 273.1105 | 273.1103 | -0.83     | 1 | 16345.5  | C19H13NO | (M+H)+  |
| 274.1147 | 274.1133 | -5.1      | 1 | 1785.17  | C19H13NO | (M+H)+  |
| 294.089  | 294.0889 | -0.11     | 1 | 2558.93  | C19H13NO | (M+Na)+ |
| 295.0925 | 295.0922 | -0.88     | 1 | 545.98   | C19H13NO | (M+Na)+ |
| 296.0922 | 296.0953 | 10.27     | 1 | 85.37    | C19H13NO | (M+Na)+ |



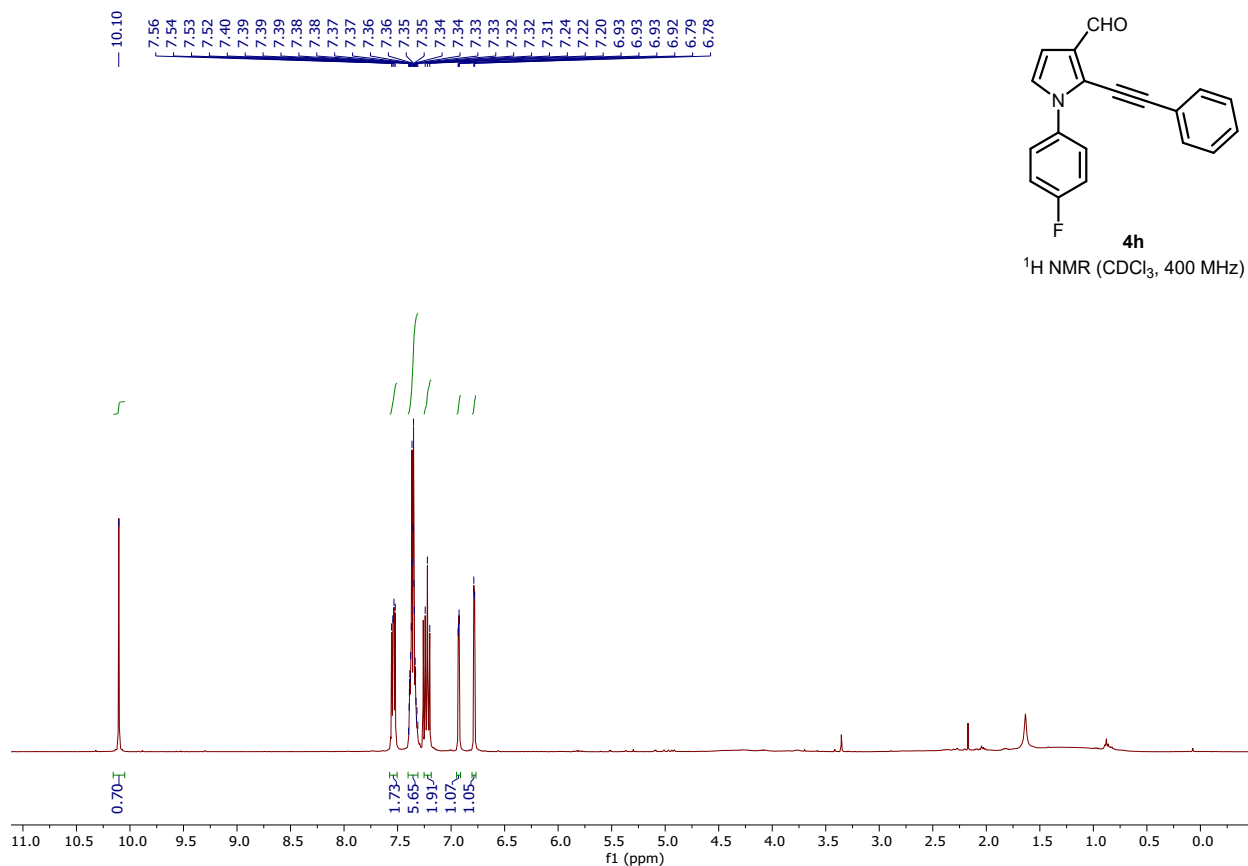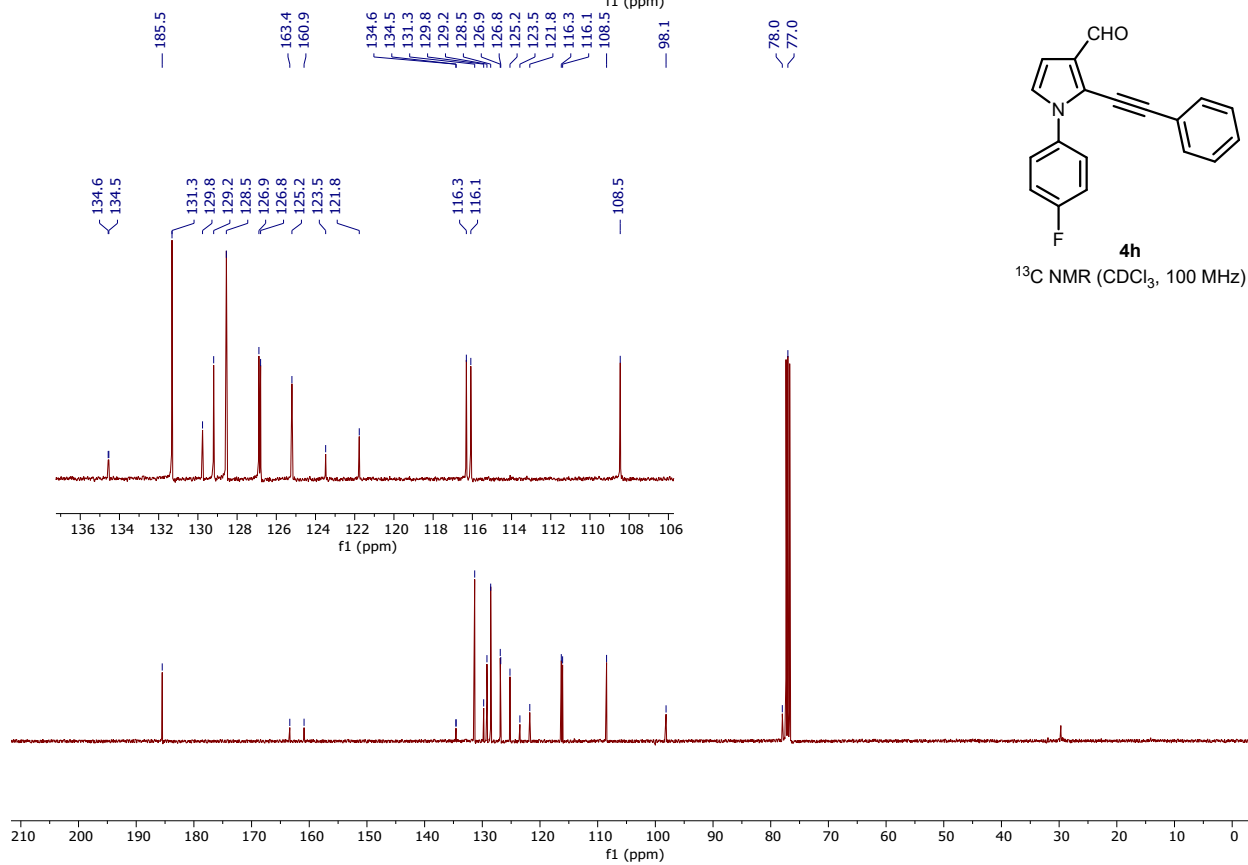

|                        |                                          |               |                     |
|------------------------|------------------------------------------|---------------|---------------------|
| Data File              | 6.d                                      | Sample Name   | 6                   |
| Sample Type            | Sample                                   | Position      | P1-B6               |
| Instrument Name        | Instrument 1                             | User Name     |                     |
| Acq Method             | ChB60ChD40_isocratic_esi_positive_3min.m | Acquired Time | 5/7/2019 6:49:19 PM |
| IRM Calibration Status | Success                                  | DA Method     | PROCESSNEW.m        |
| Comment                |                                          |               |                     |

|              |      |                |                             |
|--------------|------|----------------|-----------------------------|
| Sample Group |      | Info.          |                             |
| Stream Name  | LC 1 | Acquisition SW | 6200 series TOF/6500 series |
|              |      | Version        | Q-TOF B.06.01 (B6172 SP1)   |

#### Compound Table

| Compound Label        | RT    | Mass     | Abund | Formula       | Tgt Mass | Diff (ppm) |
|-----------------------|-------|----------|-------|---------------|----------|------------|
| Cpd 1: 0.189 290.0975 | 0.189 | 289.0902 | 95219 | C19 H12 F N O | 289.0903 | -0.18      |

| Compound Label        | m/z      | RT    | Algorithm       | Mass     |
|-----------------------|----------|-------|-----------------|----------|
| Cpd 1: 0.189 290.0975 | 290.0975 | 0.189 | Find By Formula | 289.0902 |

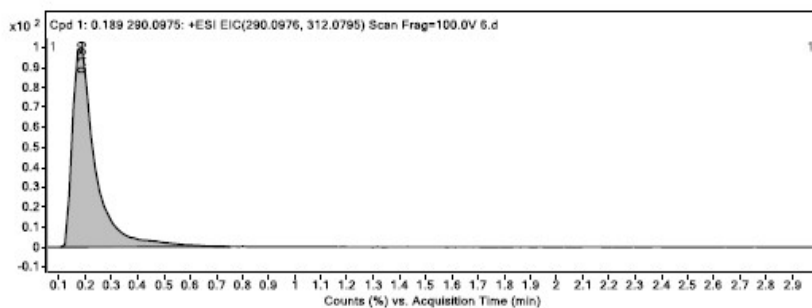

#### MS Zoomed Spectrum

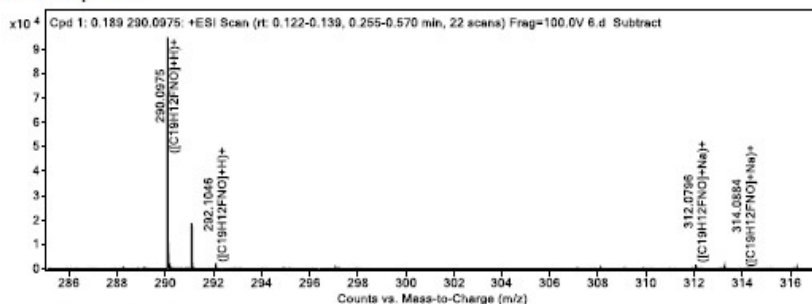

#### MS Spectrum Peak List

| m/z      | Calc m/z | Diff(ppm) | z | Abund    | Formula   | Ion     |
|----------|----------|-----------|---|----------|-----------|---------|
| 290.0975 | 290.0976 | 0.3       | 1 | 95218.65 | C19H12FNO | (M+H)+  |
| 291.1008 | 291.1008 | 0.04      | 1 | 19580.29 | C19H12FNO | (M+H)+  |
| 292.1046 | 292.1039 | -2.51     | 1 | 2083.31  | C19H12FNO | (M+H)+  |
| 293.1098 | 293.1068 | -10.27    | 1 | 186.08   | C19H12FNO | (M+H)+  |
| 312.0796 | 312.0795 | -0.15     | 1 | 1826.96  | C19H12FNO | (M+Na)+ |
| 313.083  | 313.0828 | -0.69     | 1 | 265.86   | C19H12FNO | (M+Na)+ |
| 314.0884 | 314.0858 | -8.03     | 1 | 63.35    | C19H12FNO | (M+Na)+ |

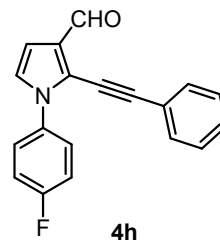

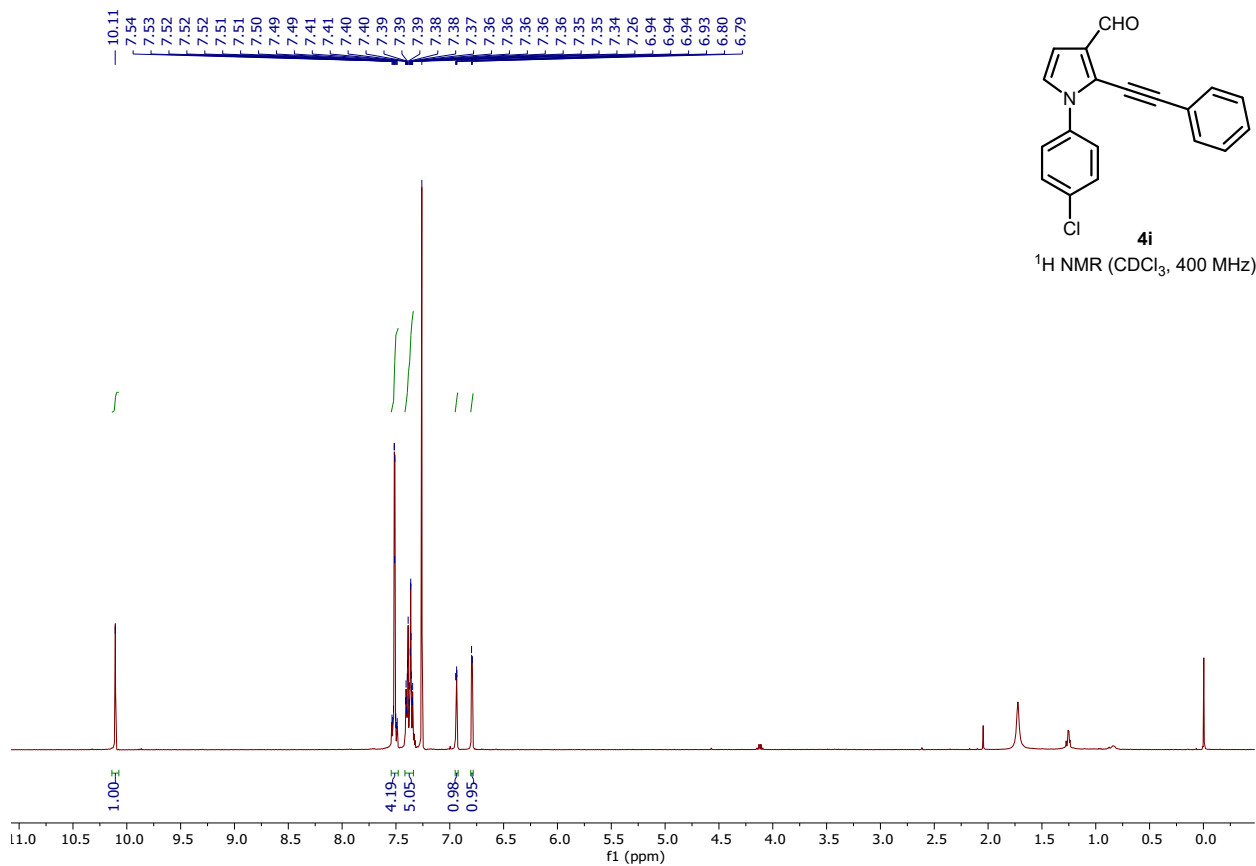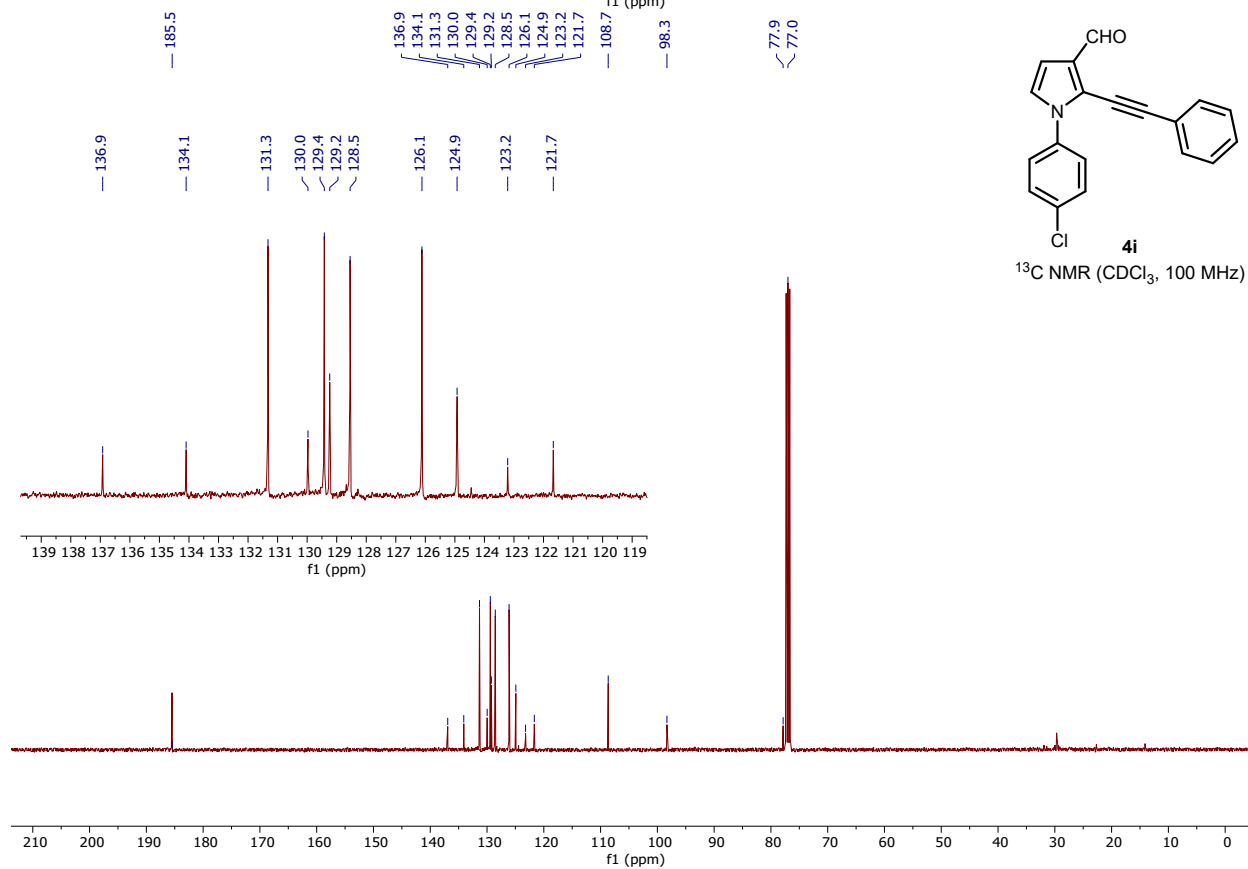

|                        |                                          |               |                     |
|------------------------|------------------------------------------|---------------|---------------------|
| Data File              | 5.d                                      | Sample Name   | 5                   |
| Sample Type            | Sample                                   | Position      | P1-B5               |
| Instrument Name        | Instrument 1                             | User Name     |                     |
| Acq Method             | ChB60ChD40_isocratic_esi_positive_3min.m | Acquired Time | 5/7/2019 6:40:58 PM |
| IRM Calibration Status | Success                                  | DA Method     | PROCESSNEW.m        |
| Comment                |                                          |               |                     |

|              |      |                |                             |
|--------------|------|----------------|-----------------------------|
| Sample Group |      | Info.          |                             |
| Stream Name  | LC 1 | Acquisition SW | 6200 series TOF/6500 series |
|              |      | Version        | Q-TOF B.06.01 (B6172 SP1)   |

### Compound Table

| Compound Label        | RT    | Mass    | Abund  | Formula        | Tgt Mass | Diff (ppm) |
|-----------------------|-------|---------|--------|----------------|----------|------------|
| Cpd 1: 0.176 306.0683 | 0.176 | 305.061 | 106459 | C19 H12 Cl N O | 305.0607 | 0.7        |

| Compound Label        | m/z      | RT    | Algorithm       | Mass    |
|-----------------------|----------|-------|-----------------|---------|
| Cpd 1: 0.176 306.0683 | 306.0683 | 0.176 | Find By Formula | 305.061 |

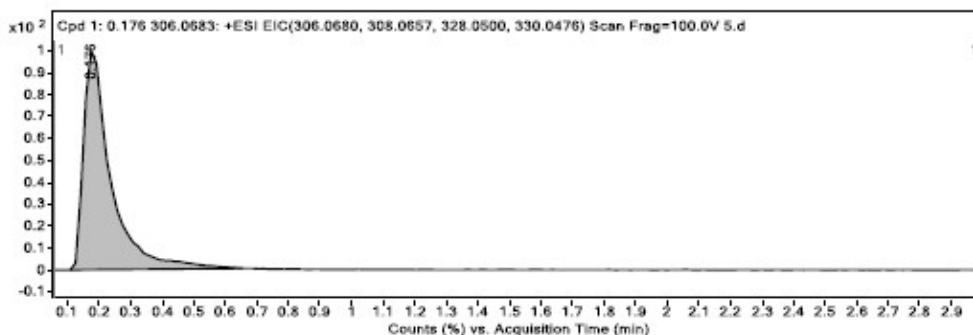

### MS Zoomed Spectrum

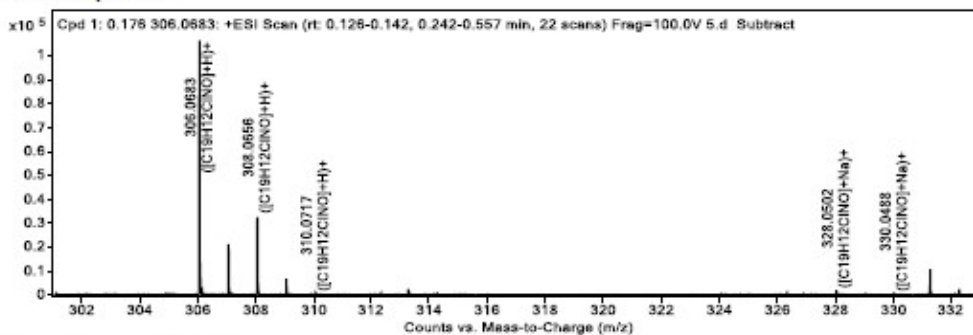

### MS Spectrum Peak List

| m/z      | Calc m/z | Diff(ppm) | z | Abund     | Formula    | Ion     |
|----------|----------|-----------|---|-----------|------------|---------|
| 306.0683 | 306.068  | -0.9      | 1 | 106459.45 | C19H12ClNO | (M+H)+  |
| 307.0716 | 307.0713 | -1.11     | 1 | 21651.07  | C19H12ClNO | (M+H)+  |
| 308.0656 | 308.0657 | 0.2       | 1 | 33304.6   | C19H12ClNO | (M+H)+  |
| 309.0687 | 309.0686 | -0.31     | 1 | 6765.33   | C19H12ClNO | (M+H)+  |
| 310.0717 | 310.0715 | -0.73     | 1 | 728.4     | C19H12ClNO | (M+H)+  |
| 311.0759 | 311.0744 | -4.99     | 1 | 90.88     | C19H12ClNO | (M+H)+  |
| 328.0502 | 328.05   | -0.66     | 1 | 2027.2    | C19H12ClNO | (M+Na)+ |
| 329.0537 | 329.0532 | -1.51     | 1 | 462.68    | C19H12ClNO | (M+Na)+ |
| 330.0488 | 330.0476 | -3.42     | 1 | 673.53    | C19H12ClNO | (M+Na)+ |
| 331.0486 | 331.0505 | 5.81      | 1 | 161.11    | C19H12ClNO | (M+Na)+ |

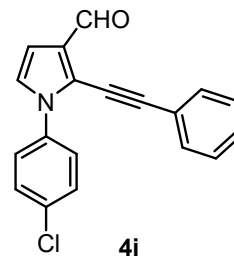

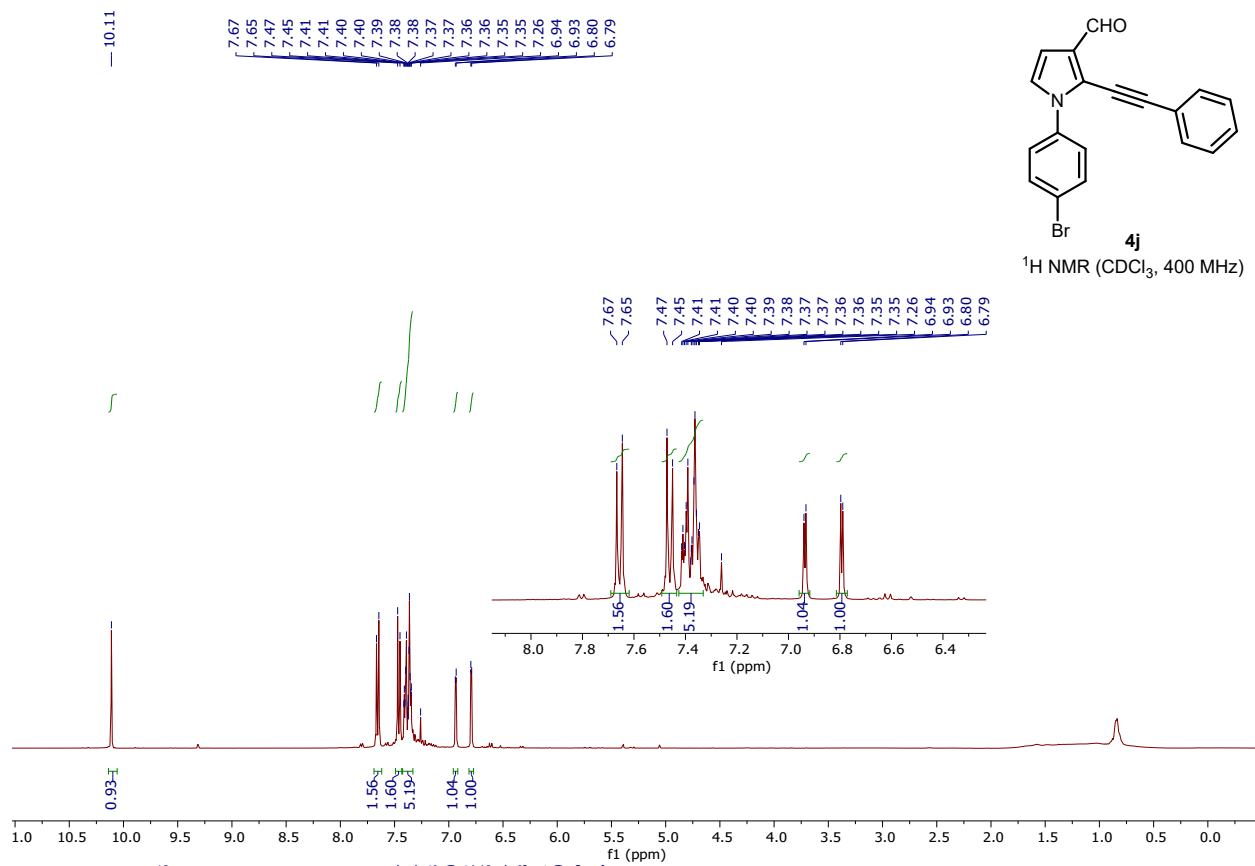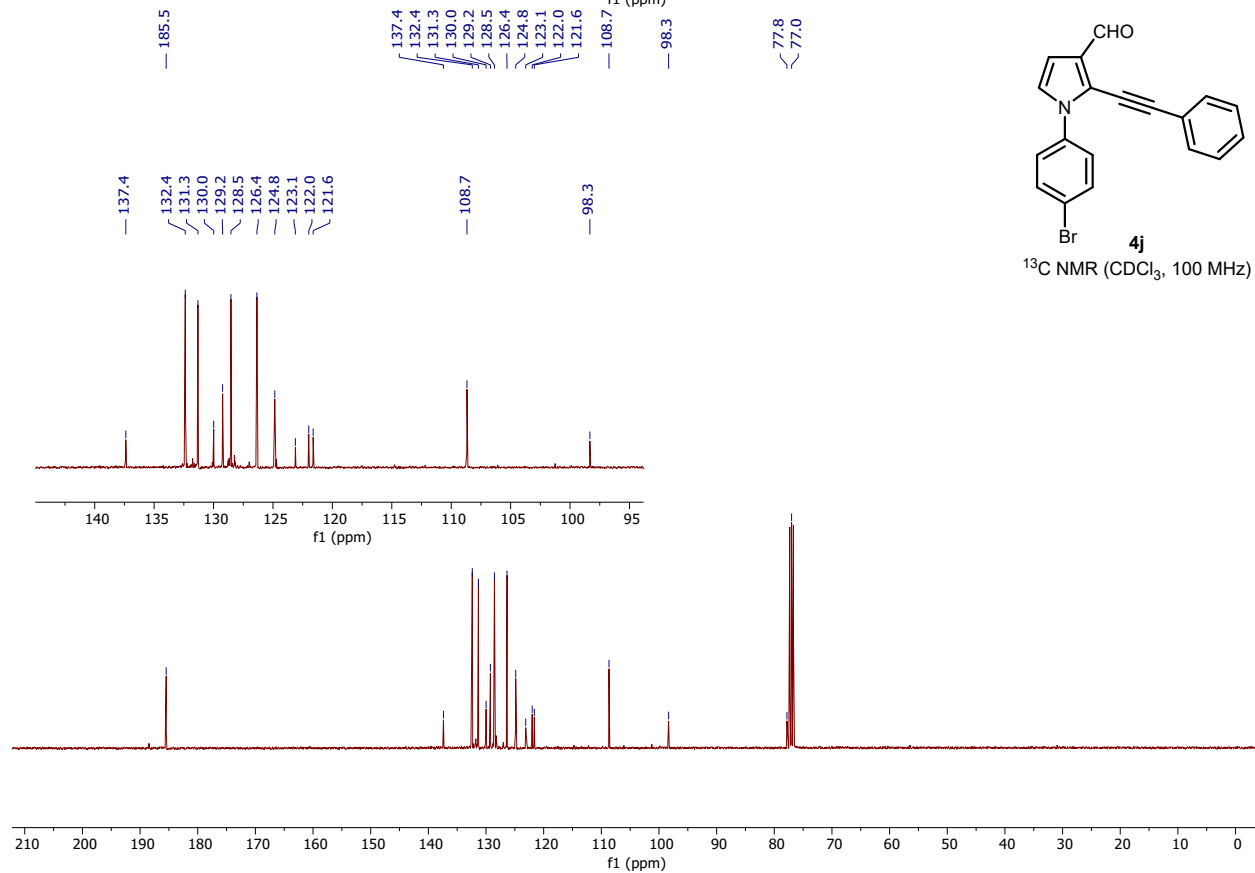

|                        |                                          |               |                     |
|------------------------|------------------------------------------|---------------|---------------------|
| Data File              | 8.d                                      | Sample Name   | 8                   |
| Sample Type            | Sample                                   | Position      | P1-B8               |
| Instrument Name        | Instrument 1                             | User Name     |                     |
| Acq Method             | ChB60ChD40_isocratic_esi_positive_3min.m | Acquired Time | 5/7/2019 7:05:59 PM |
| IRM Calibration Status | Success                                  | DA Method     | PROCESSNEW.m        |
| Comment                |                                          |               |                     |

|              |      |                |                             |
|--------------|------|----------------|-----------------------------|
| Sample Group |      | Info.          |                             |
| Stream Name  | LC 1 | Acquisition SW | 6200 series TOF/6500 series |
|              |      | Version        | Q-TOF B.06.01 (B6172 SP1)   |

### Compound Table

| Compound Label        | RT    | Mass     | Abund  | Formula    | Tgt Mass | Diff (ppm) |
|-----------------------|-------|----------|--------|------------|----------|------------|
| Cpd 1: 0.185 350.0179 | 0.185 | 349.0106 | 106647 | C19H12BrNO | 349.0102 | 1.16       |

| Compound Label        | m/z      | RT    | Algorithm       | Mass     |
|-----------------------|----------|-------|-----------------|----------|
| Cpd 1: 0.185 350.0179 | 350.0179 | 0.185 | Find By Formula | 349.0106 |

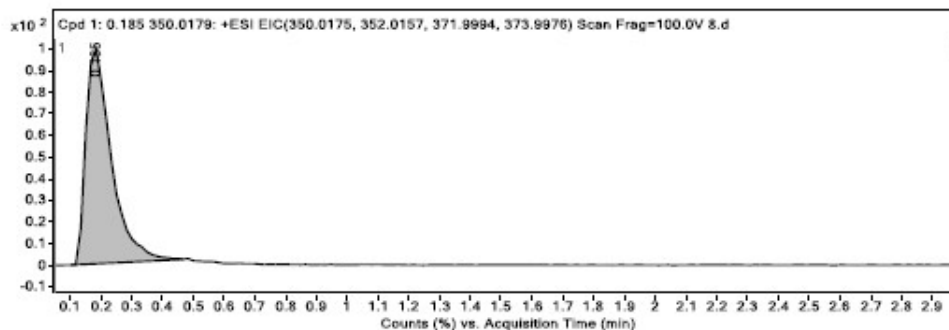

### MS Zoomed Spectrum

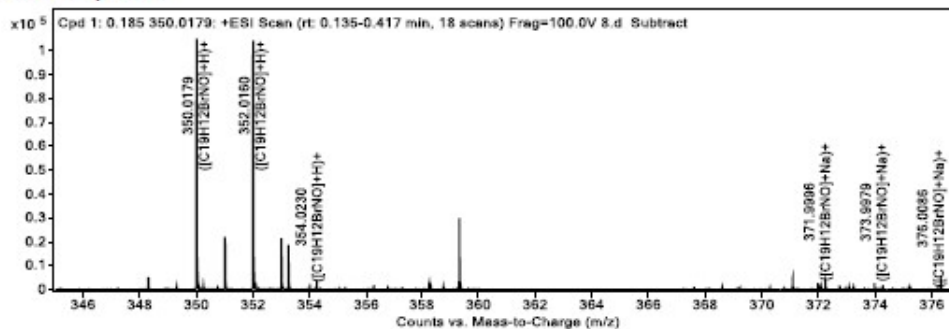

### MS Spectrum Peak List

| m/z      | Calc m/z | Diff(ppm) | z | Abund     | Formula    | Ion     |
|----------|----------|-----------|---|-----------|------------|---------|
| 350.0179 | 350.0175 | -1.12     | 1 | 106646.78 | C19H12BrNO | (M+H)+  |
| 351.0213 | 351.0208 | -1.57     | 1 | 22226.58  | C19H12BrNO | (M+H)+  |
| 352.016  | 352.0157 | -0.99     | 1 | 104488.75 | C19H12BrNO | (M+H)+  |
| 353.0193 | 353.0188 | -1.39     | 1 | 21638.8   | C19H12BrNO | (M+H)+  |
| 354.023  | 354.0218 | -3.36     | 1 | 2303.98   | C19H12BrNO | (M+H)+  |
| 355.0262 | 355.0247 | -4.21     | 1 | 219.97    | C19H12BrNO | (M+H)+  |
| 371.9996 | 371.9994 | -0.4      | 1 | 2852.54   | C19H12BrNO | (M+Na)+ |
| 373.003  | 373.0027 | -0.73     | 1 | 588.91    | C19H12BrNO | (M+Na)+ |
| 373.9979 | 373.9976 | -0.83     | 1 | 2706.39   | C19H12BrNO | (M+Na)+ |
| 375.0018 | 375.0007 | -2.85     | 1 | 582.05    | C19H12BrNO | (M+Na)+ |
| 376.0086 | 376.0038 | -12.95    | 1 | 116.3     | C19H12BrNO | (M+Na)+ |

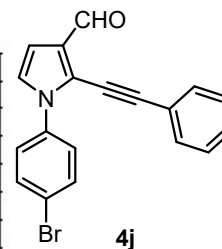

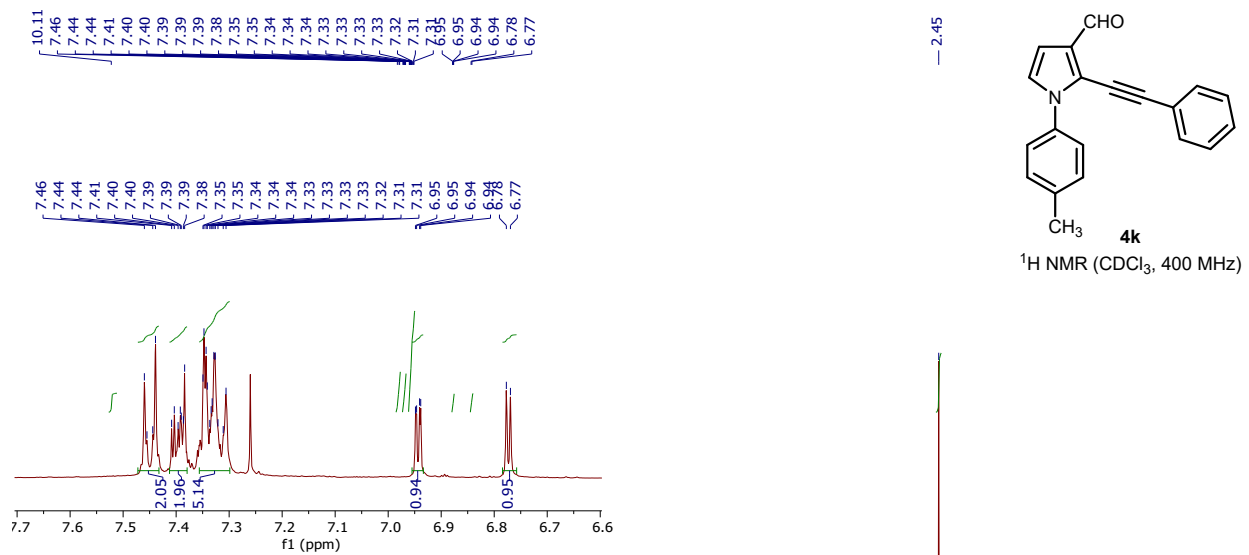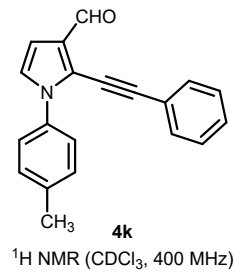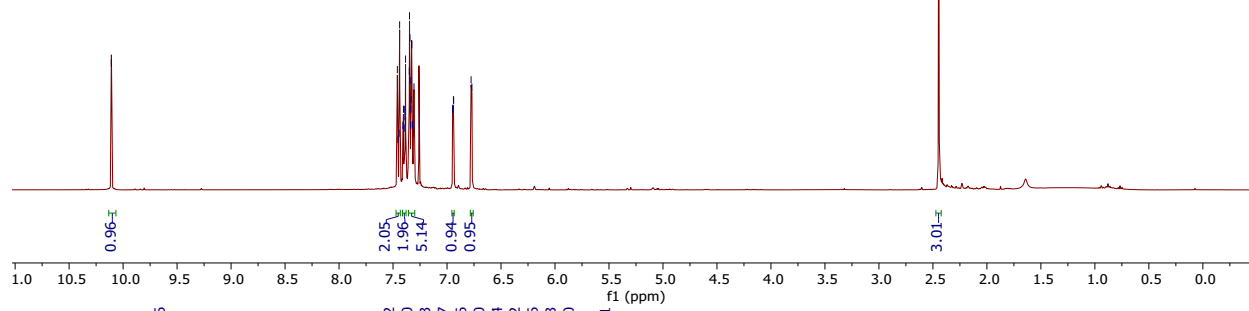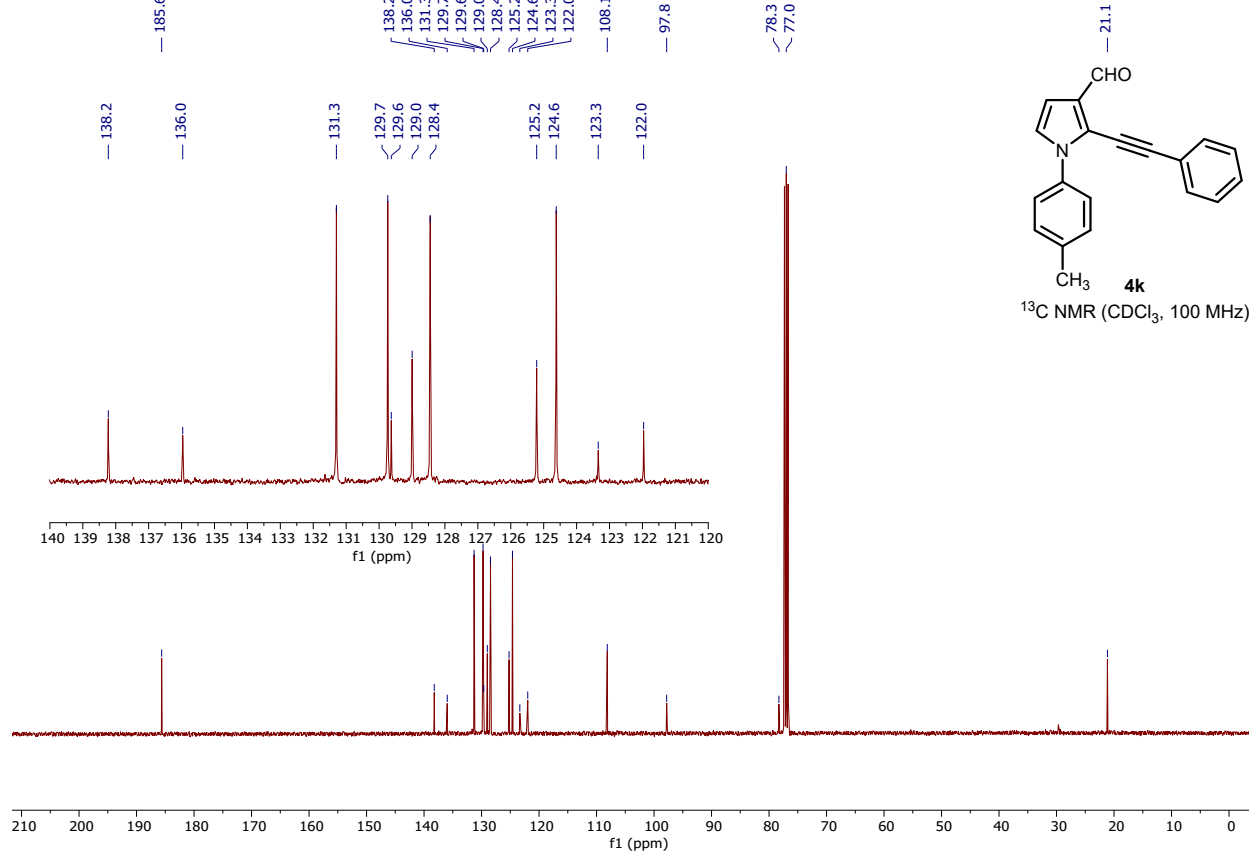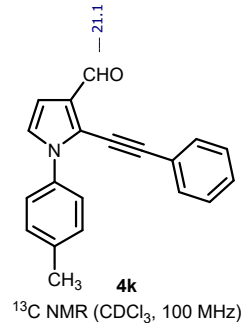

|                        |                                          |               |                     |
|------------------------|------------------------------------------|---------------|---------------------|
| Data File              | 4.d                                      | Sample Name   | 4                   |
| Sample Type            | Sample                                   | Position      | P1-B4               |
| Instrument Name        | Instrument 1                             | User Name     |                     |
| Acq Method             | ChB60ChD40_isocratic_esi_positive_3min.m | Acquired Time | 5/7/2019 6:32:37 PM |
| IRM Calibration Status | Success                                  | DA Method     | PROCESSNEW.m        |
| Comment                |                                          |               |                     |

|              |      |                |                             |
|--------------|------|----------------|-----------------------------|
| Sample Group |      | Info.          |                             |
| Stream Name  | LC 1 | Acquisition SW | 6200 series TOF/6500 series |
|              |      | Version        | Q-TOF B.06.01 (B6172 SP1)   |

### Compound Table

| Compound Label        | RT    | Mass     | Abund  | Formula     | Tgt Mass | Diff (ppm) |
|-----------------------|-------|----------|--------|-------------|----------|------------|
| Cpd 1: 0.171 286.1229 | 0.171 | 285.1156 | 114136 | C20 H15 N O | 285.1154 | 0.94       |

| Compound Label        | m/z      | RT    | Algorithm       | Mass     |
|-----------------------|----------|-------|-----------------|----------|
| Cpd 1: 0.171 286.1229 | 286.1229 | 0.171 | Find By Formula | 285.1156 |

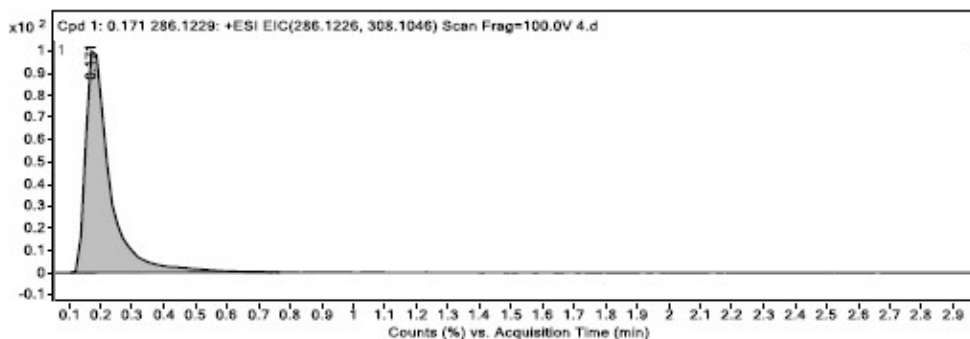

### MS Zoomed Spectrum

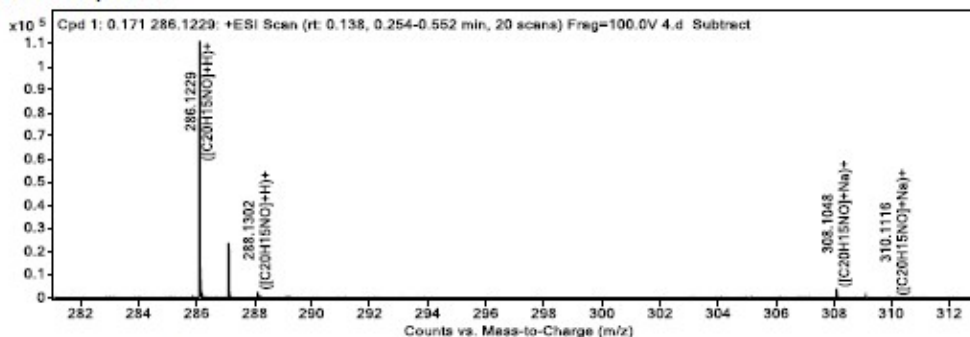

### MS Spectrum Peak List

| m/z      | Calc m/z | Diff(ppm) | z | Abund     | Formula  | Ion                 |
|----------|----------|-----------|---|-----------|----------|---------------------|
| 286.1229 | 286.1226 | -0.82     | 1 | 114135.98 | C20H15NO | (M+H) <sup>+</sup>  |
| 287.1262 | 287.1259 | -1.02     | 1 | 24646.46  | C20H15NO | (M+H) <sup>+</sup>  |
| 288.1302 | 288.129  | -4.2      | 1 | 2670.58   | C20H15NO | (M+H) <sup>+</sup>  |
| 289.1361 | 289.1319 | -14.24    | 1 | 267.9     | C20H15NO | (M+H) <sup>+</sup>  |
| 308.1048 | 308.1046 | -0.75     | 1 | 3832.11   | C20H15NO | (M+Na) <sup>+</sup> |
| 309.1077 | 309.1079 | 0.65      | 1 | 805.7     | C20H15NO | (M+Na) <sup>+</sup> |
| 310.1116 | 310.1109 | -2.1      | 1 | 98.95     | C20H15NO | (M+Na) <sup>+</sup> |

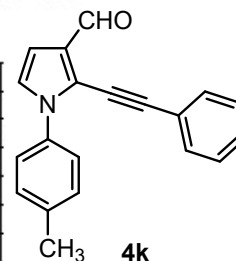



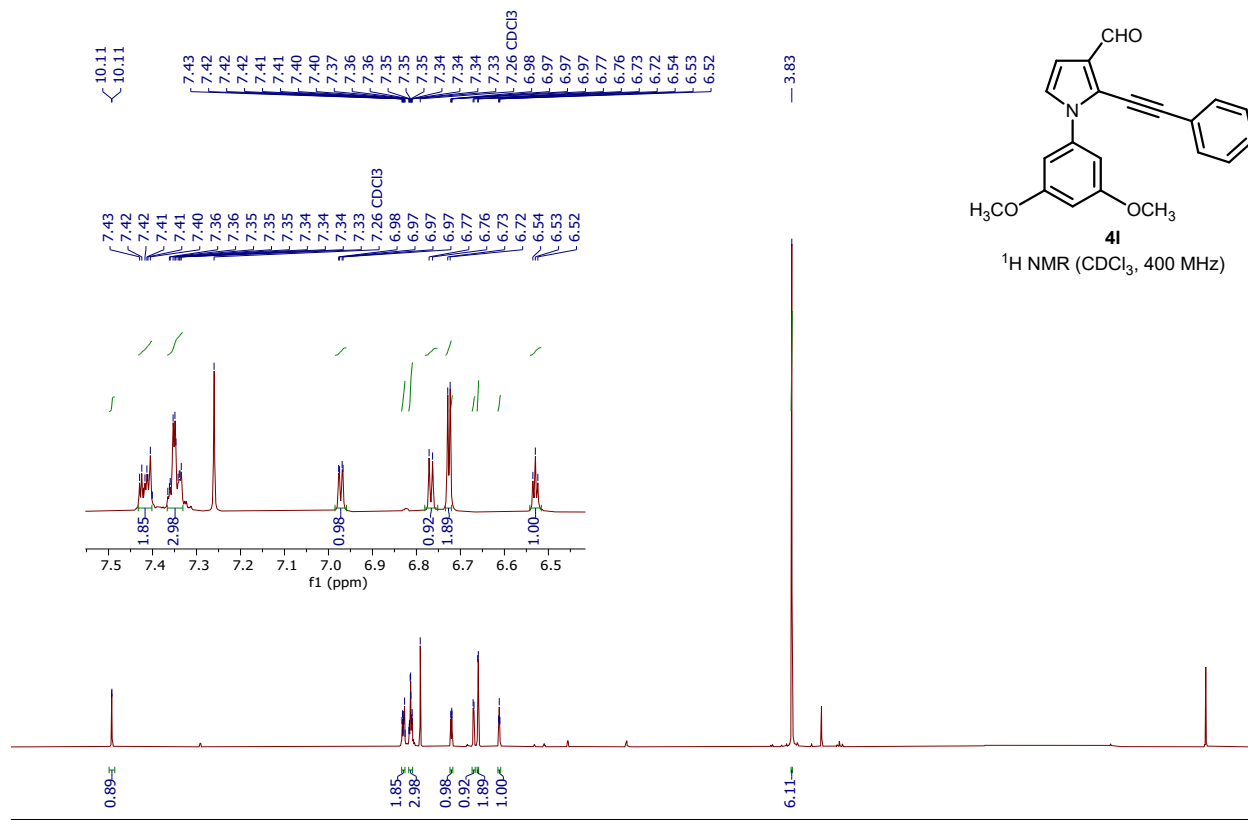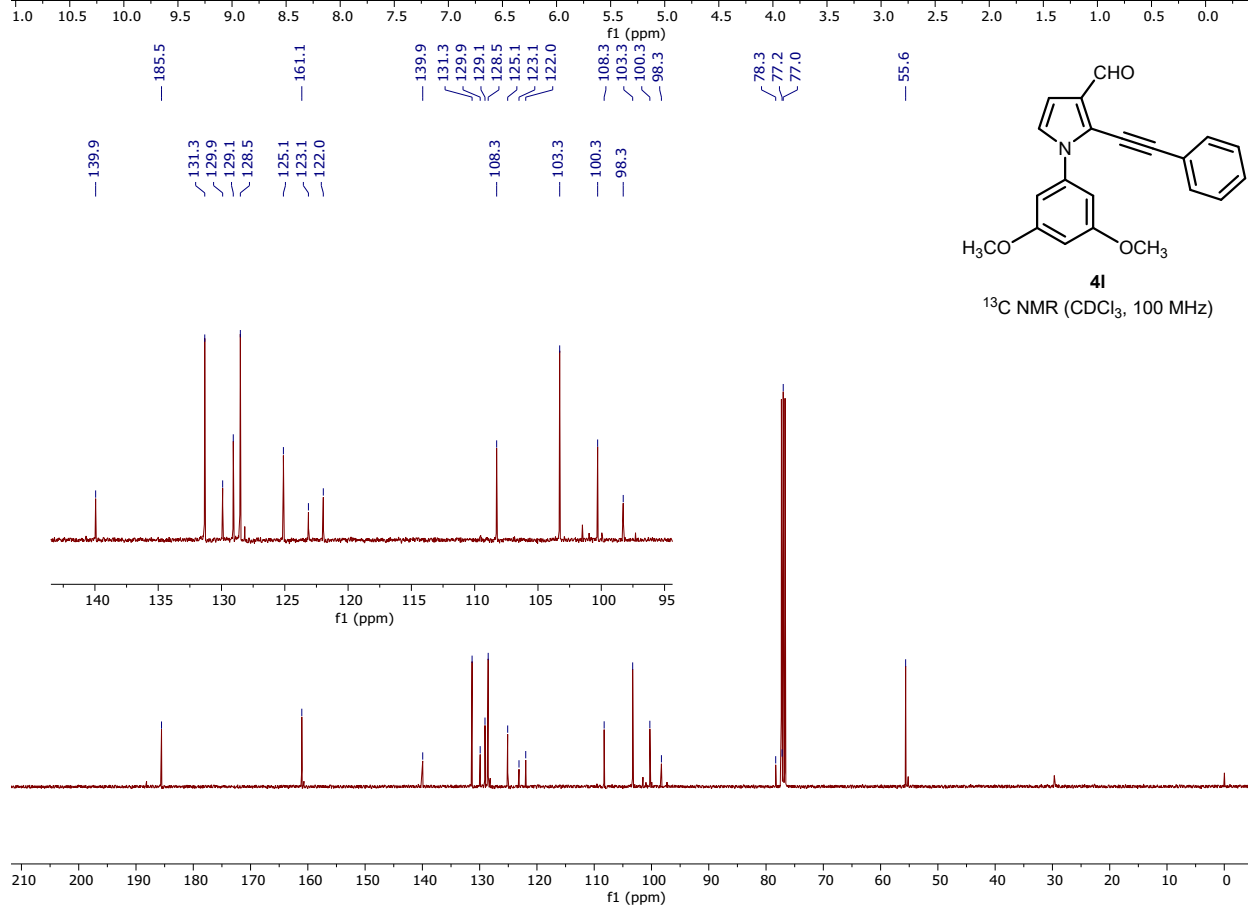

|                        |                                          |               |                     |
|------------------------|------------------------------------------|---------------|---------------------|
| Data File              | 2d.d                                     | Sample Name   | 2                   |
| Sample Type            | Sample                                   | Position      | P1-B2               |
| Instrument Name        | Instrument 1                             | User Name     |                     |
| Acq Method             | ChB60ChD40_isocratic_esi_positive_3min.m | Acquired Time | 5/7/2019 6:15:57 PM |
| IRM Calibration Status | Success                                  | DA Method     | PROCESSNEW.m        |
| Comment                |                                          |               |                     |

|              |      |                |                             |
|--------------|------|----------------|-----------------------------|
| Sample Group |      | Info.          |                             |
| Stream Name  | LC 1 | Acquisition SW | 6200 series TOF/6500 series |
|              |      | Version        | Q-TOF B.06.01 (B6172 SP1)   |

### Compound Table

| Compound Label        | RT    | Mass     | Abund | Formula      | Tgt Mass | Diff (ppm) |
|-----------------------|-------|----------|-------|--------------|----------|------------|
| Cpd 1: 0.176 421.1920 | 0.176 | 331.1216 | 93626 | C21 H17 N O3 | 331.1208 | 2.35       |

| Compound Label        | m/z      | RT    | Algorithm       | Mass     |
|-----------------------|----------|-------|-----------------|----------|
| Cpd 1: 0.176 421.1920 | 332.1289 | 0.176 | Find By Formula | 331.1216 |

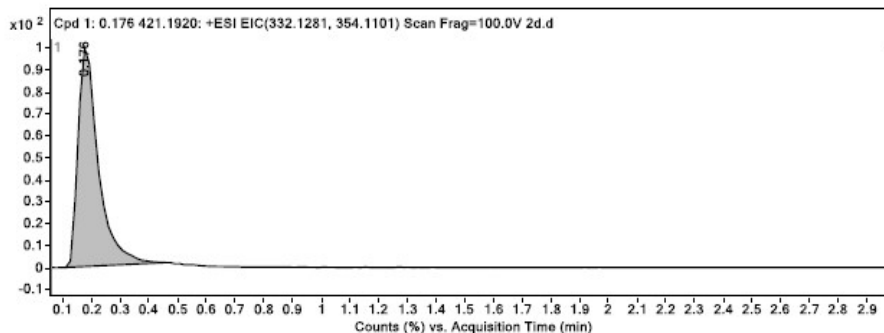

### MS Zoomed Spectrum

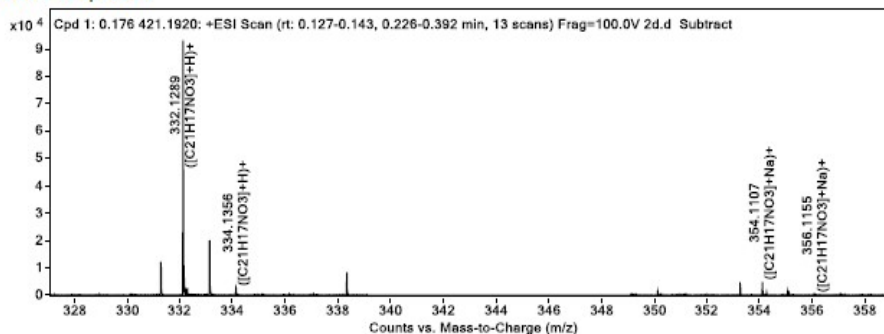

### MS Spectrum Peak List

| m/z      | Calc m/z | Diff(ppm) | z | Abund    | Formula   | Ion     |
|----------|----------|-----------|---|----------|-----------|---------|
| 332.1289 | 332.1281 | -2.32     | 1 | 93625.55 | C21H17NO3 | (M+H)+  |
| 333.1322 | 333.1314 | -2.45     | 1 | 20901.31 | C21H17NO3 | (M+H)+  |
| 334.1356 | 334.1342 | -3.92     | 1 | 2648.44  | C21H17NO3 | (M+H)+  |
| 354.1107 | 354.1101 | -1.91     | 1 | 4846.8   | C21H17NO3 | (M+Na)+ |
| 355.1136 | 355.1133 | -0.84     | 1 | 1261.62  | C21H17NO3 | (M+Na)+ |
| 356.1155 | 356.1162 | 1.83      | 1 | 267.14   | C21H17NO3 | (M+Na)+ |

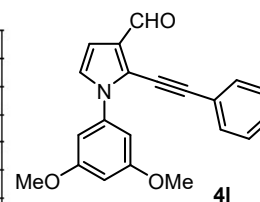

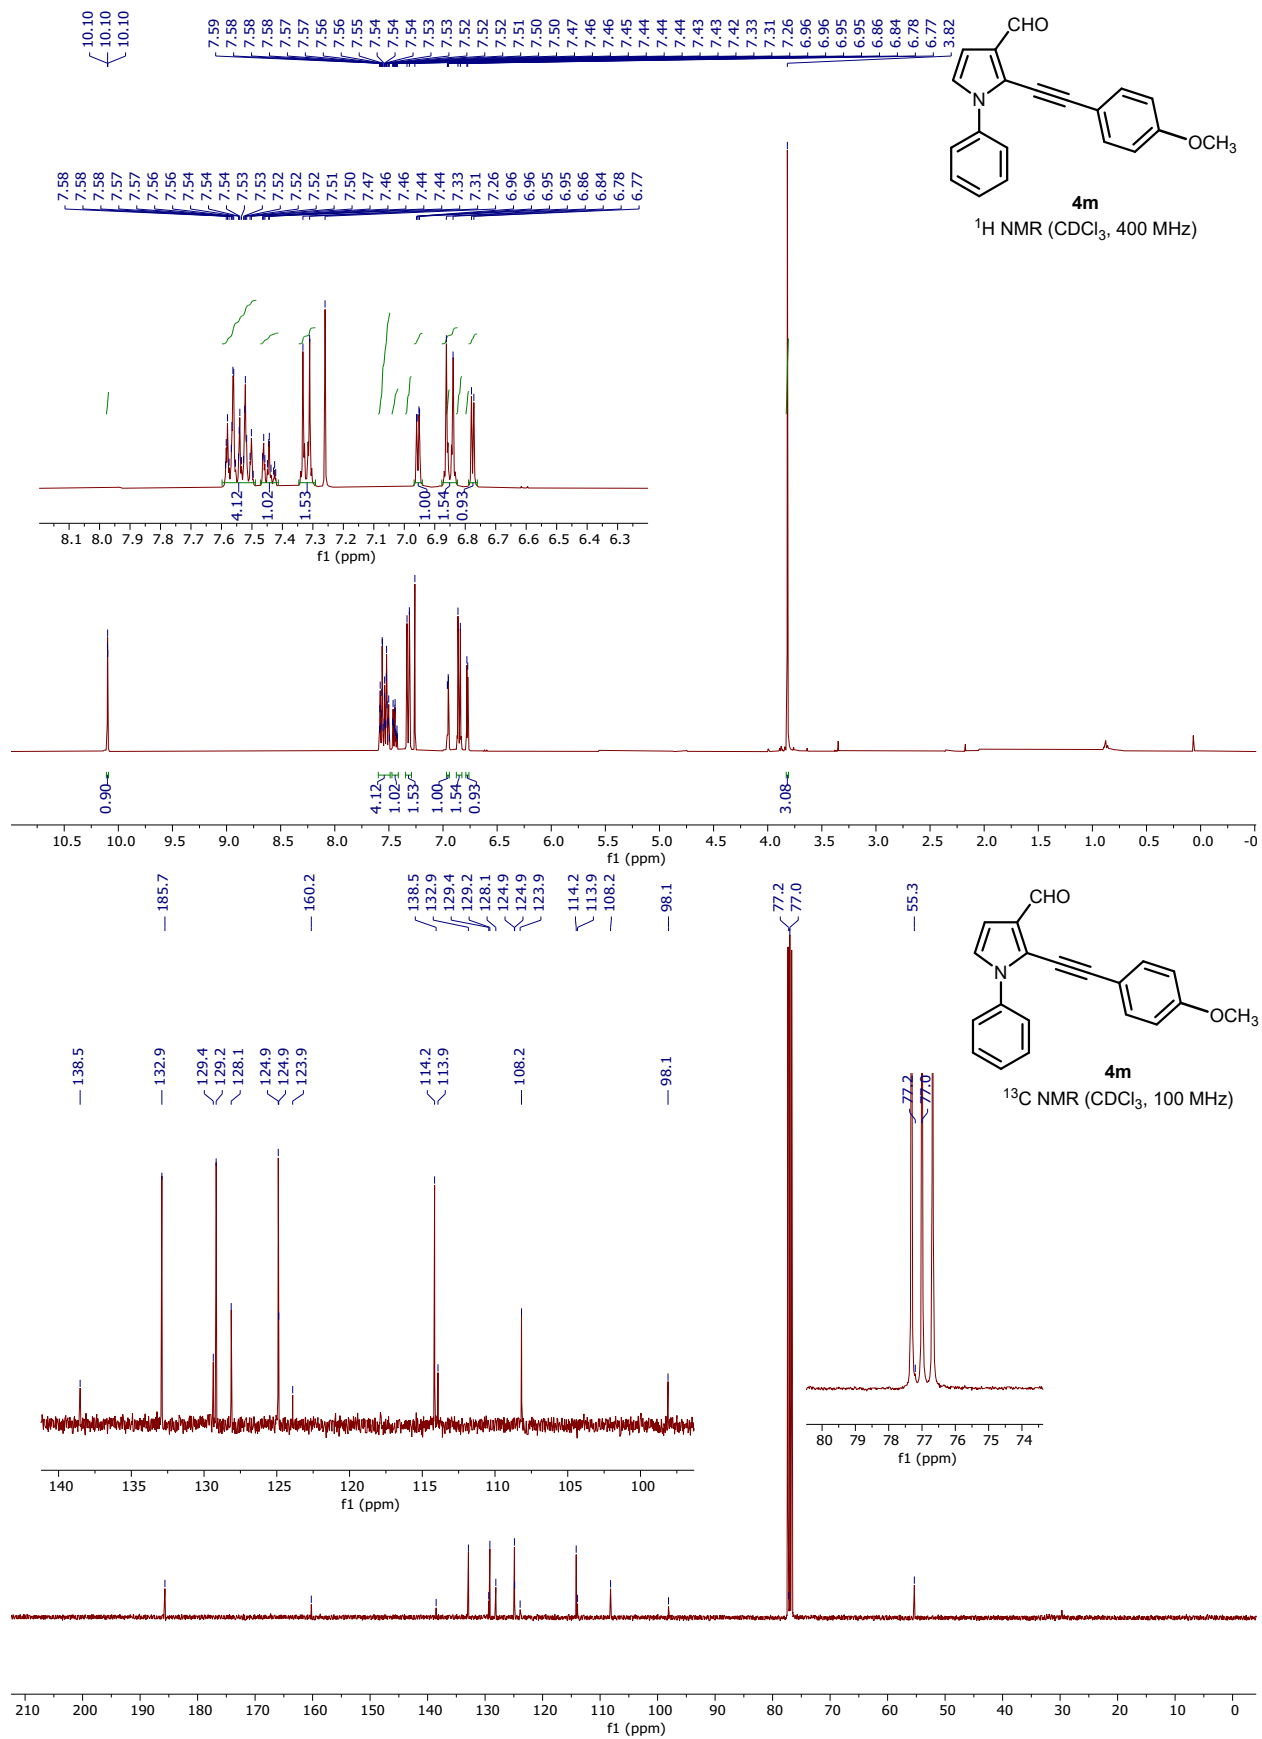

|                        |                                          |               |                     |
|------------------------|------------------------------------------|---------------|---------------------|
| Data File              | MACPH.d                                  | Sample Name   | MACPH               |
| Sample Type            | Sample                                   | Position      | P1-C8               |
| Instrument Name        | Instrument 1                             | User Name     |                     |
| Acq Method             | ChB60ChD40_isocratic_esi_positive_3min.m | Acquired Time | 5/8/2019 5:55:53 PM |
| IRM Calibration Status | Success                                  | DA Method     | PROCESSNEW.m        |
| Comment                |                                          |               |                     |

|              |      |                |                             |
|--------------|------|----------------|-----------------------------|
| Sample Group |      | Info.          |                             |
| Stream Name  | LC 1 | Acquisition SW | 6200 series TOF/6500 series |
|              |      | Version        | Q-TOF B.06.01 (B6172 SP1)   |

### Compound Table

| Compound Label        | RT    | Mass     | Abund | Formula      | Tgt Mass | Diff (ppm) |
|-----------------------|-------|----------|-------|--------------|----------|------------|
| Cpd 1: 0.186 302.1176 | 0.186 | 301.1104 | 47992 | C20 H15 N O2 | 301.1103 | 0.32       |

| Compound Label        | m/z      | RT    | Algorithm       | Mass     |
|-----------------------|----------|-------|-----------------|----------|
| Cpd 1: 0.186 302.1176 | 302.1176 | 0.186 | Find By Formula | 301.1104 |

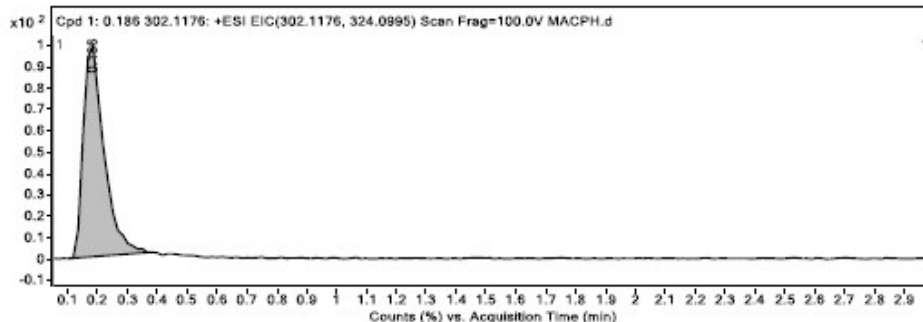

### MS Zoomed Spectrum

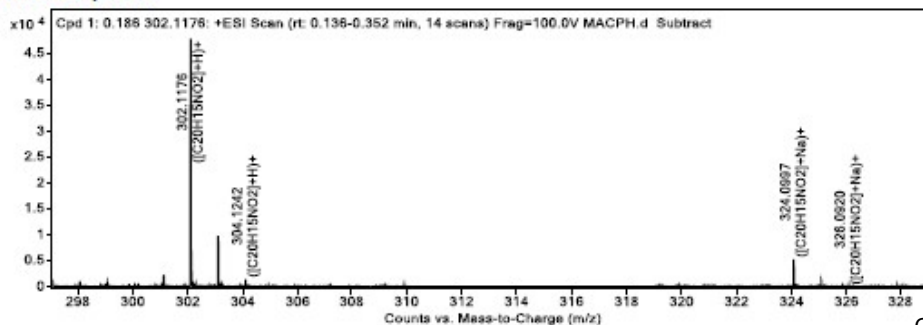

### MS Spectrum Peak List

| m/z      | Calc m/z | Diff(ppm) | z | Abund    | Formula   | Ion     |
|----------|----------|-----------|---|----------|-----------|---------|
| 302.1176 | 302.1176 | -0.13     | 1 | 47991.99 | C20H15NO2 | (M+H)+  |
| 303.1212 | 303.1208 | -1.21     | 1 | 9806.79  | C20H15NO2 | (M+H)+  |
| 304.1242 | 304.1238 | -1.31     | 1 | 1438.42  | C20H15NO2 | (M+H)+  |
| 305.1209 | 305.1265 | 18.41     | 1 | 96.44    | C20H15NO2 | (M+H)+  |
| 324.0997 | 324.0995 | -0.68     | 1 | 5312.54  | C20H15NO2 | (M+Na)+ |
| 325.1029 | 325.1028 | -0.41     | 1 | 1088.06  | C20H15NO2 | (M+Na)+ |
| 326.092  | 326.1057 | 41.98     | 1 | 32.34    | C20H15NO2 | (M+Na)+ |

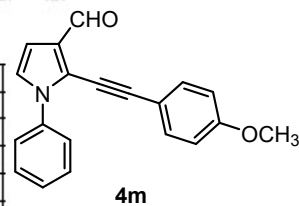

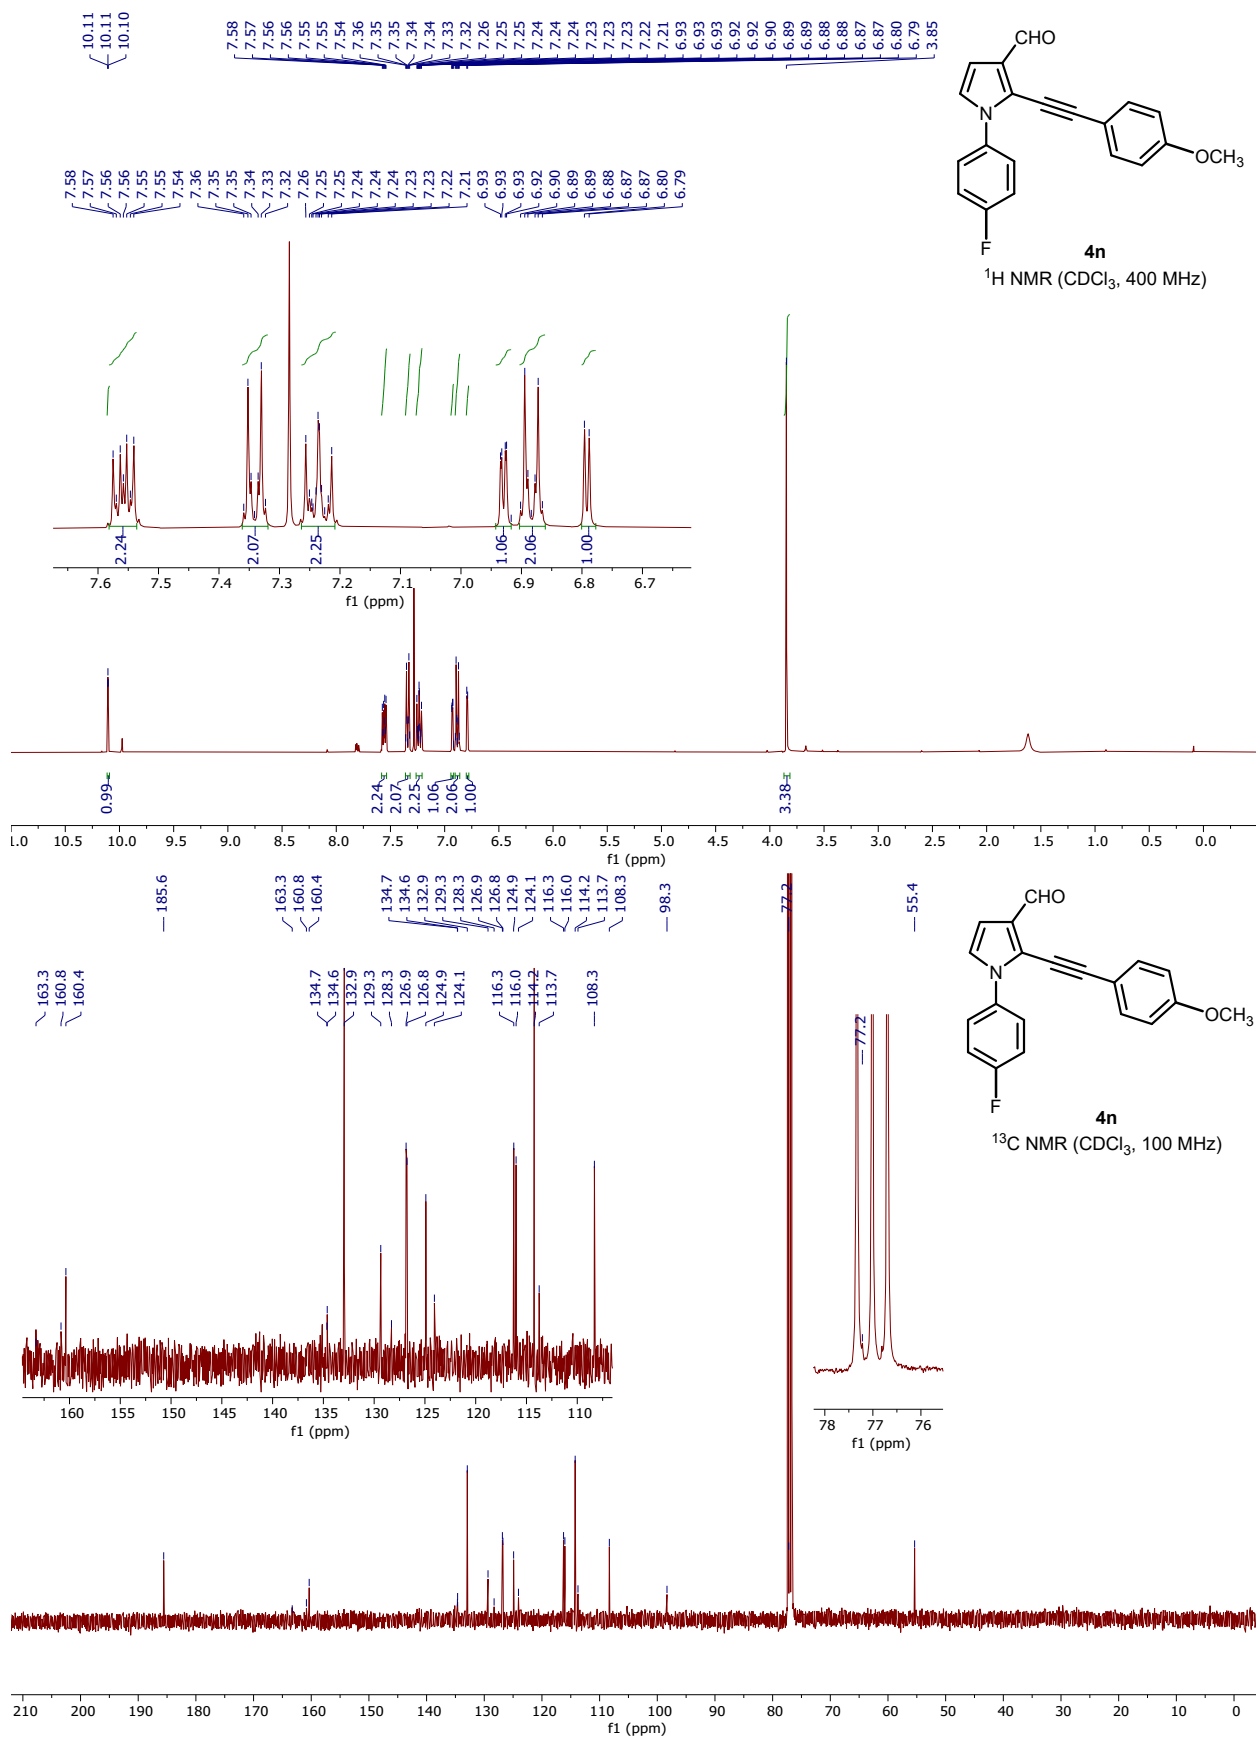

|                        |                                          |               |                     |
|------------------------|------------------------------------------|---------------|---------------------|
| Data File              | MAC4F.d                                  | Sample Name   | MAC4F               |
| Sample Type            | Sample                                   | Position      | P1-C5               |
| Instrument Name        | Instrument 1                             | User Name     |                     |
| Acq Method             | ChB60ChD40_isocratic_esi_positive_3min.m | Acquired Time | 5/8/2019 6:12:33 PM |
| IRM Calibration Status | Success                                  | DA Method     | PROCESSNEW.m        |
| Comment                |                                          |               |                     |

|              |      |                |                             |
|--------------|------|----------------|-----------------------------|
| Sample Group |      | Info.          |                             |
| Stream Name  | LC 1 | Acquisition SW | 6200 series TOF/6500 series |
|              |      | Version        | Q-TOF B.06.01 (B6172 SP1)   |

### Compound Table

| Compound Label        | RT   | Mass     | Abund | Formula        | Tgt Mass | Diff (ppm) |
|-----------------------|------|----------|-------|----------------|----------|------------|
| Cpd 1: 0.190 610.1843 | 0.19 | 319.1011 | 16276 | C20 H14 F N O2 | 319.1009 | 0.91       |

| Compound Label        | m/z      | RT   | Algorithm       | Mass     |
|-----------------------|----------|------|-----------------|----------|
| Cpd 1: 0.190 610.1843 | 320.1084 | 0.19 | Find By Formula | 319.1011 |

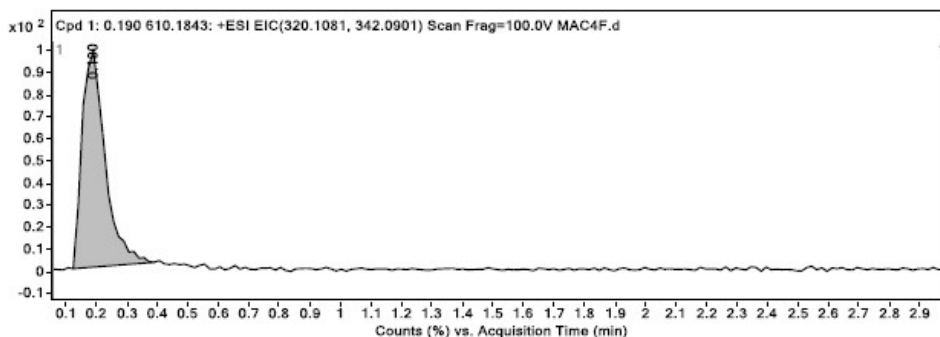

### MS Zoomed Spectrum

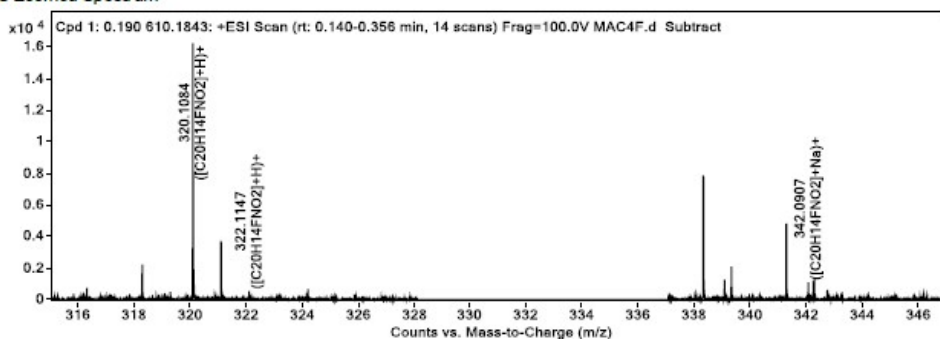

### MS Spectrum Peak List

| m/z      | Calc m/z | Diff(ppm) | z | Abund    | Formula    | Ion     |
|----------|----------|-----------|---|----------|------------|---------|
| 320.1084 | 320.1081 | -0.91     | 1 | 16276.14 | C20H14FNO2 | (M+H)+  |
| 321.1116 | 321.1114 | -0.48     | 1 | 3749.48  | C20H14FNO2 | (M+H)+  |
| 322.1147 | 322.1143 | -1.2      | 1 | 531.62   | C20H14FNO2 | (M+H)+  |
| 323.1203 | 323.1171 | -9.75     | 1 | 63.83    | C20H14FNO2 | (M+H)+  |
| 342.0907 | 342.0901 | -1.76     | 1 | 1093.72  | C20H14FNO2 | (M+Na)+ |
| 343.0932 | 343.0934 | 0.33      | 1 | 212.11   | C20H14FNO2 | (M+Na)+ |

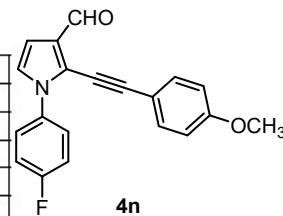

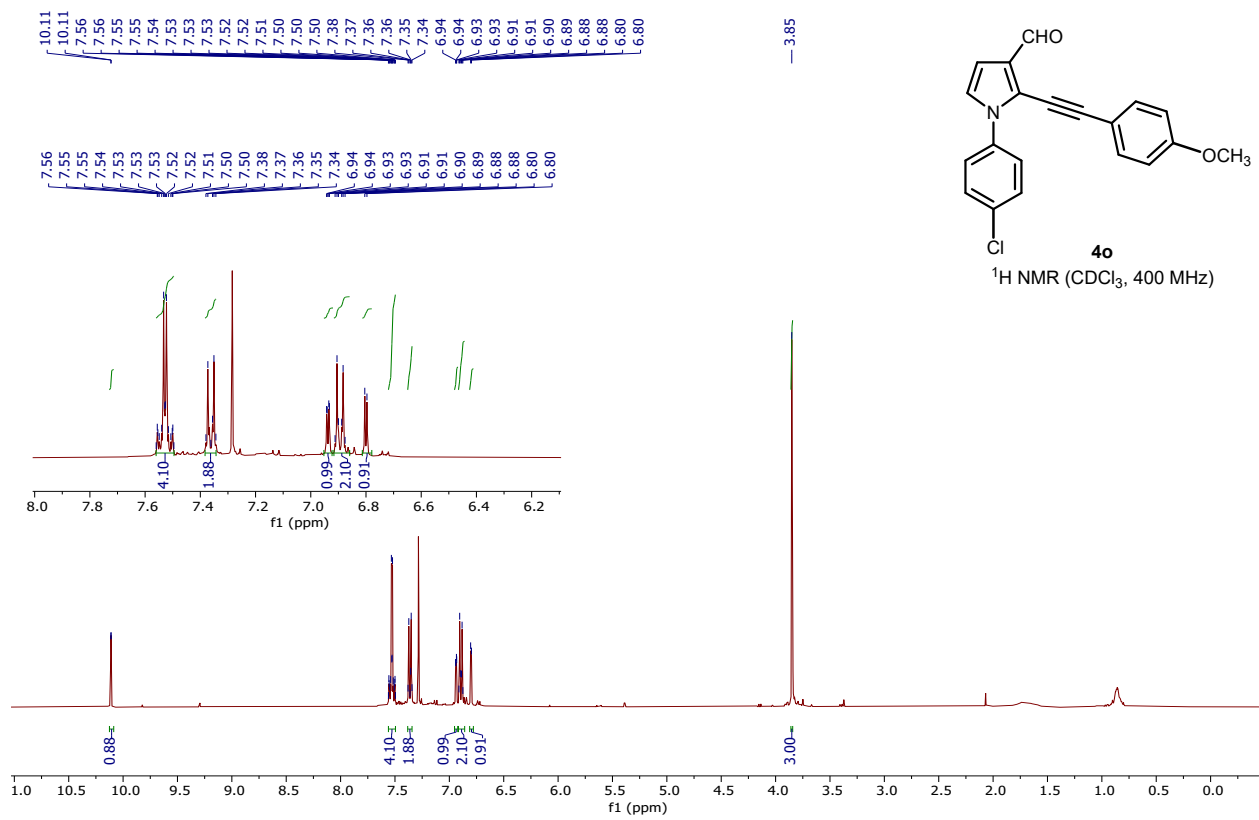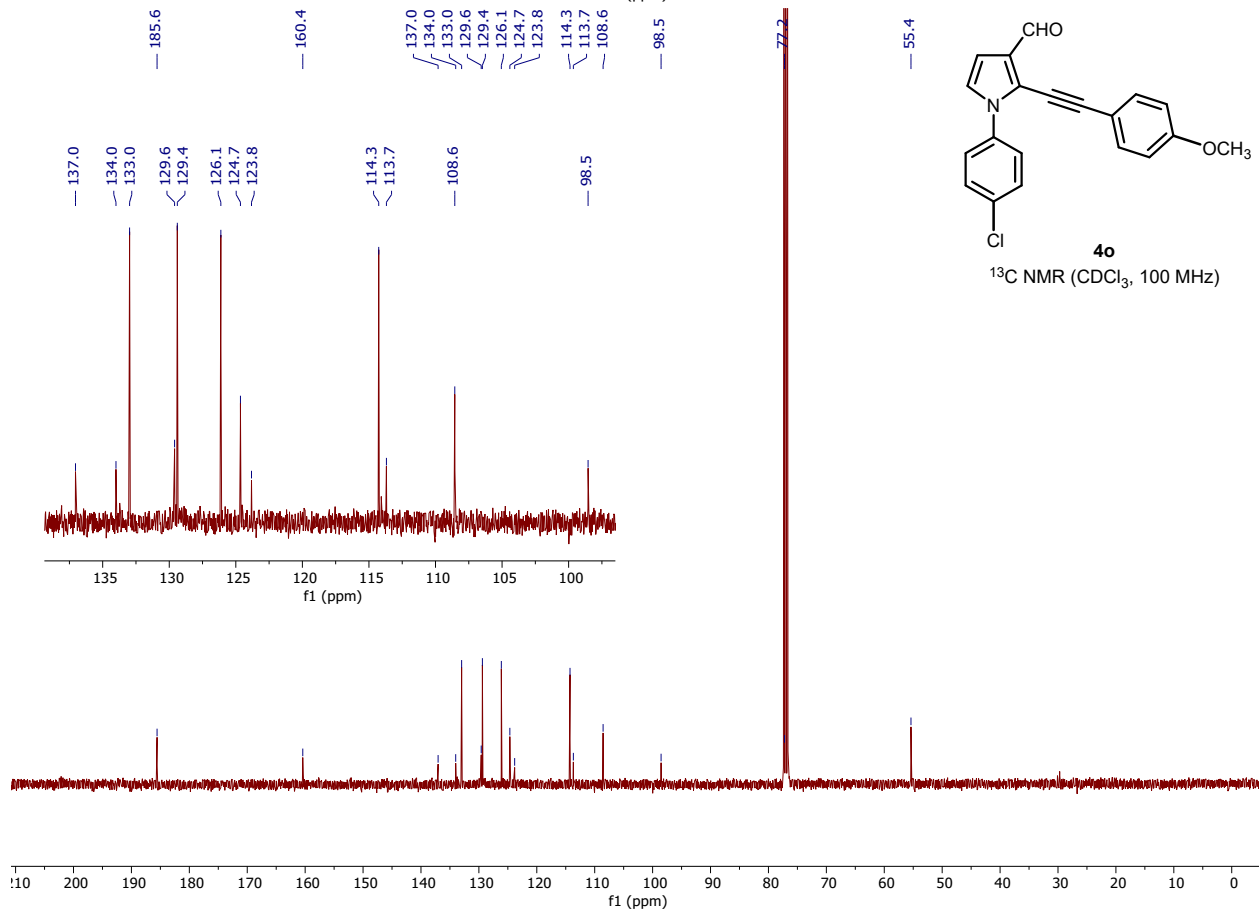

|                        |                                          |               |                     |
|------------------------|------------------------------------------|---------------|---------------------|
| Data File              | MAC4Cl.d                                 | Sample Name   | MAC4Cl              |
| Sample Type            | Sample                                   | Position      | P1-B11              |
| Instrument Name        | Instrument 1                             | User Name     |                     |
| Acq Method             | ChB60ChD40_isocratic_esi_positive_3min.m | Acquired Time | 5/8/2019 5:30:51 PM |
| IRM Calibration Status | Success                                  | DA Method     | PROCESSNEW.m        |
| Comment                |                                          |               |                     |

|              |      |                |                             |
|--------------|------|----------------|-----------------------------|
| Sample Group |      | Info.          |                             |
| Stream Name  | LC 1 | Acquisition SW | 6200 series TOF/6500 series |
|              |      | Version        | Q-TOF B.06.01 (B6172 SP1)   |

### Compound Table

| Compound Label        | RT    | Mass   | Abund | Formula         | Tgt Mass | Diff (ppm) |
|-----------------------|-------|--------|-------|-----------------|----------|------------|
| Cpd 1: 0.182 331.2837 | 0.182 | 335.07 | 7726  | C20 H14 Cl N O2 | 335.0713 | -3.84      |

| Compound Label        | m/z      | RT    | Algorithm       | Mass   |
|-----------------------|----------|-------|-----------------|--------|
| Cpd 1: 0.182 331.2837 | 336.0777 | 0.182 | Find By Formula | 335.07 |

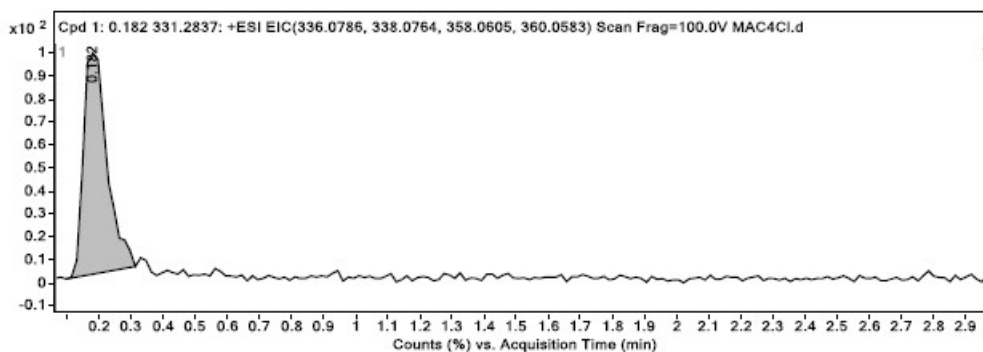

### MS Zoomed Spectrum

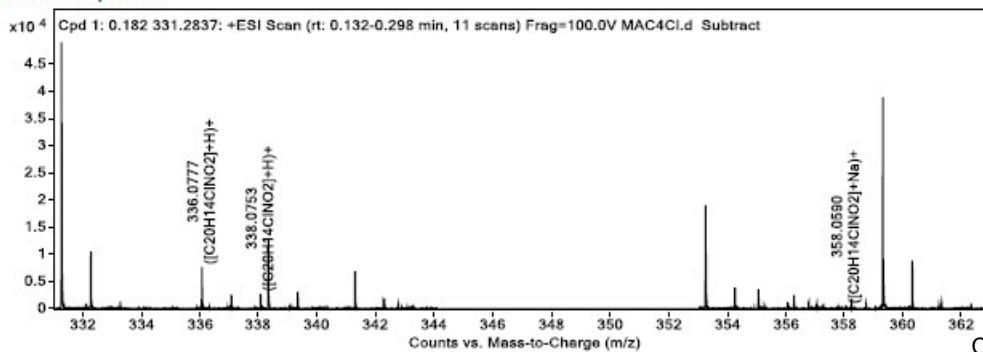

### MS Spectrum Peak List

| m/z      | Calc m/z | Diff(ppm) | z | Abund   | Formula     | Ion     |
|----------|----------|-----------|---|---------|-------------|---------|
| 336.0777 | 336.0786 | 2.77      | 1 | 7725.93 | C20H14ClNO2 | (M+H)+  |
| 337.0778 | 337.0819 | 11.97     | 1 | 2585.17 | C20H14ClNO2 | (M+H)+  |
| 338.0753 | 338.0764 | 3.02      | 1 | 2800.21 | C20H14ClNO2 | (M+H)+  |
| 339.084  | 339.0792 | -14.29    | 1 | 610.56  | C20H14ClNO2 | (M+H)+  |
| 358.059  | 358.0605 | 4.19      | 1 | 504.92  | C20H14ClNO2 | (M+Na)+ |

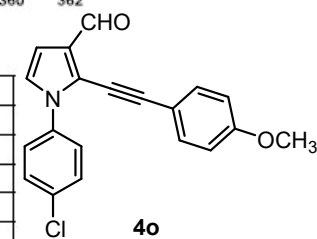



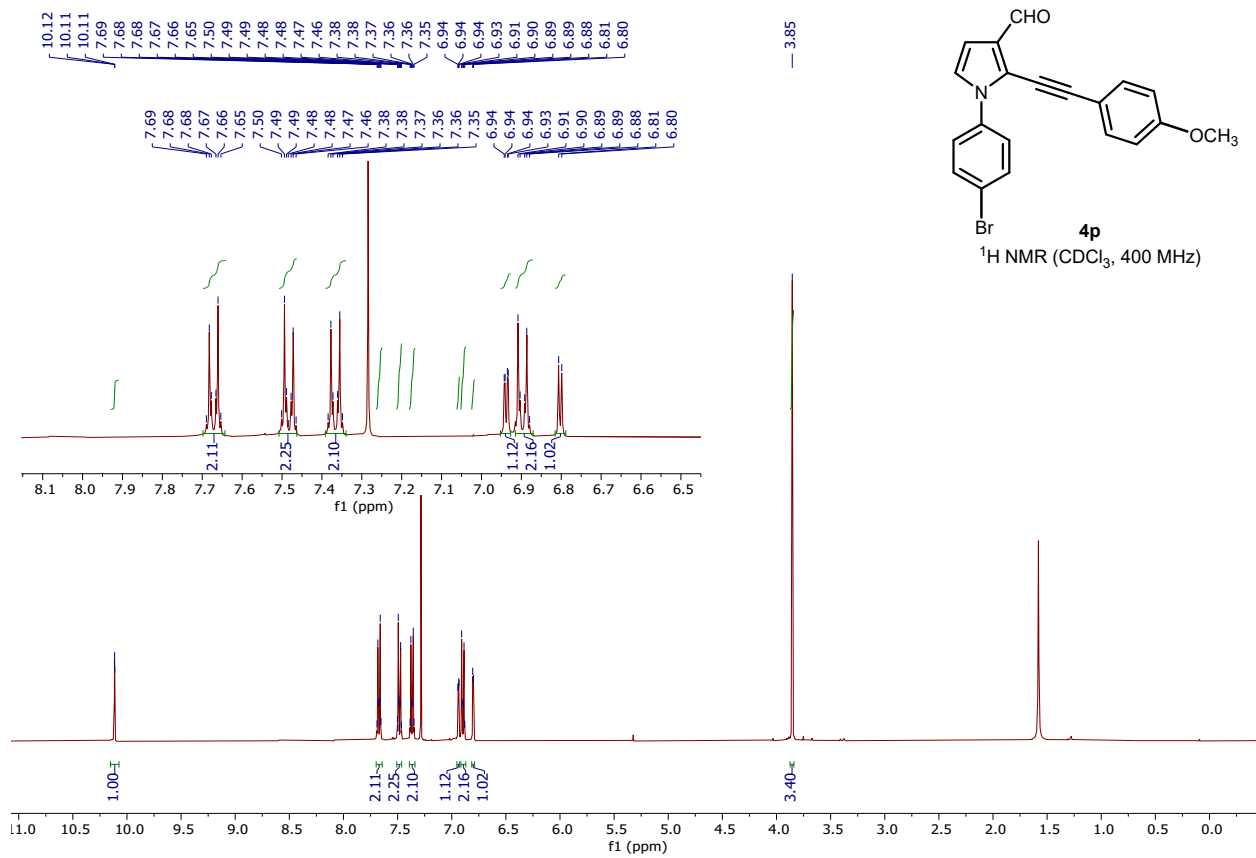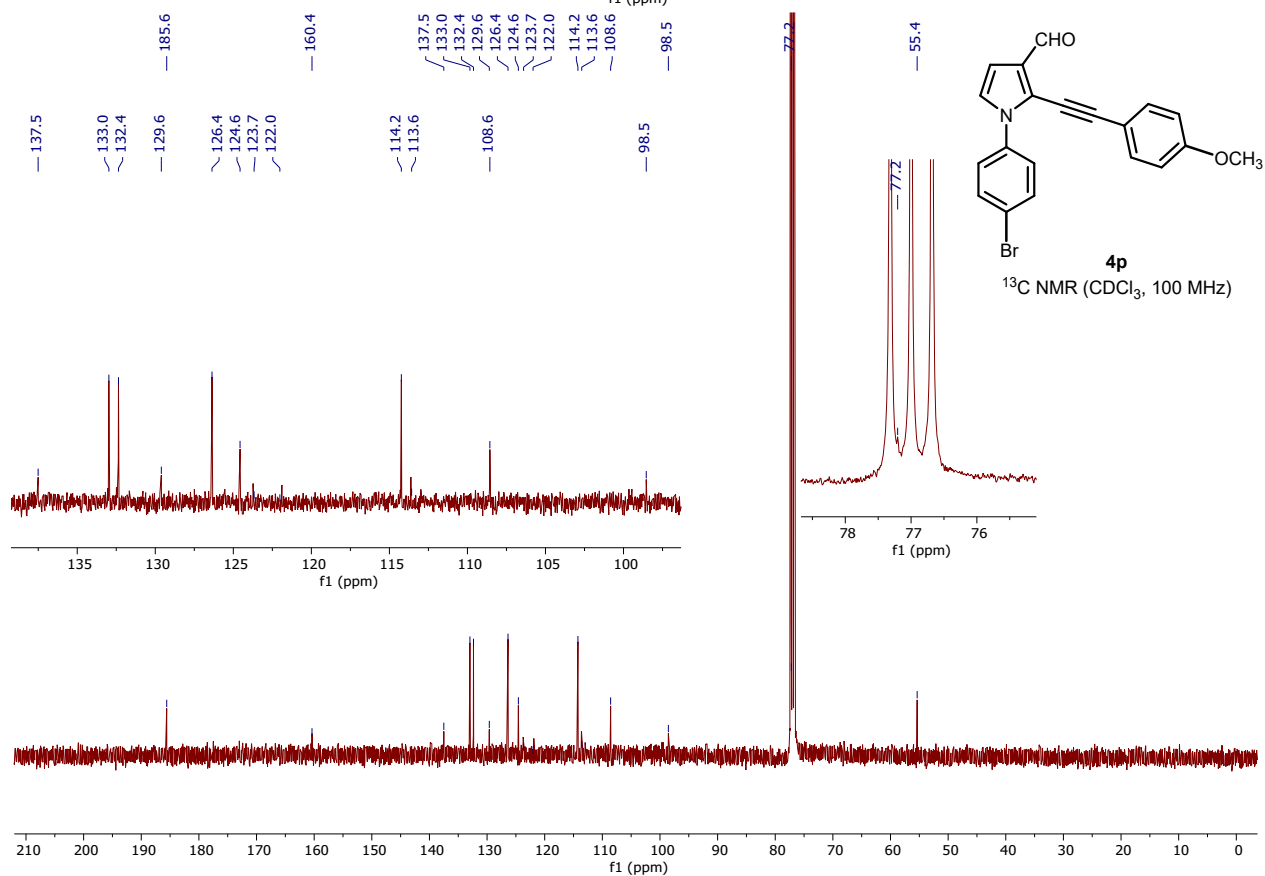

|                        |                                          |               |                     |
|------------------------|------------------------------------------|---------------|---------------------|
| Data File              | MAC4BR.d                                 | Sample Name   | MAC4BR              |
| Sample Type            | Sample                                   | Position      | P1-C6               |
| Instrument Name        | Instrument 1                             | User Name     |                     |
| Acq Method             | ChB60ChD40_isocratic_esi_positive_3min.m | Acquired Time | 5/8/2019 5:39:10 PM |
| IRM Calibration Status | Success                                  | DA Method     | PROCESSNEW.m        |
| Comment                |                                          |               |                     |

|              |      |                |                             |
|--------------|------|----------------|-----------------------------|
| Sample Group |      | Info.          |                             |
| Stream Name  | LC 1 | Acquisition SW | 6200 series TOF/6500 series |
|              |      | Version        | Q-TOF B.06.01 (B6172 SP1)   |

### Compound Table

| Compound Label        | RT   | Mass     | Abund | Formula         | Tgt Mass | Diff (ppm) |
|-----------------------|------|----------|-------|-----------------|----------|------------|
| Cpd 1: 0.180 331.2840 | 0.18 | 379.0203 | 15341 | C20 H14 Br N O2 | 379.0208 | -1.25      |

| Compound Label        | m/z      | RT   | Algorithm       | Mass     |
|-----------------------|----------|------|-----------------|----------|
| Cpd 1: 0.180 331.2840 | 380.0276 | 0.18 | Find By Formula | 379.0203 |

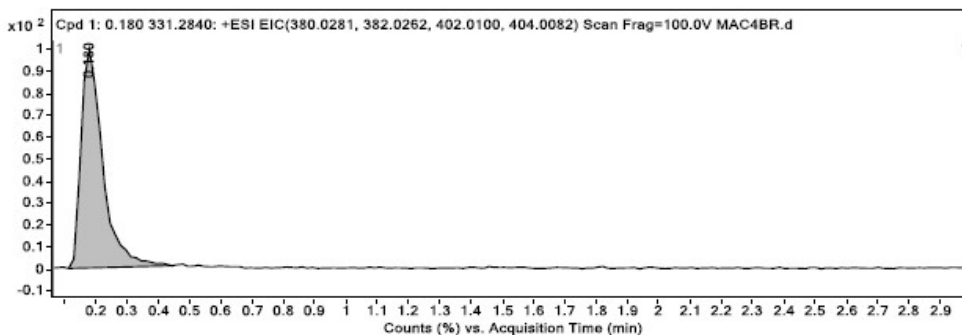

### MS Zoomed Spectrum

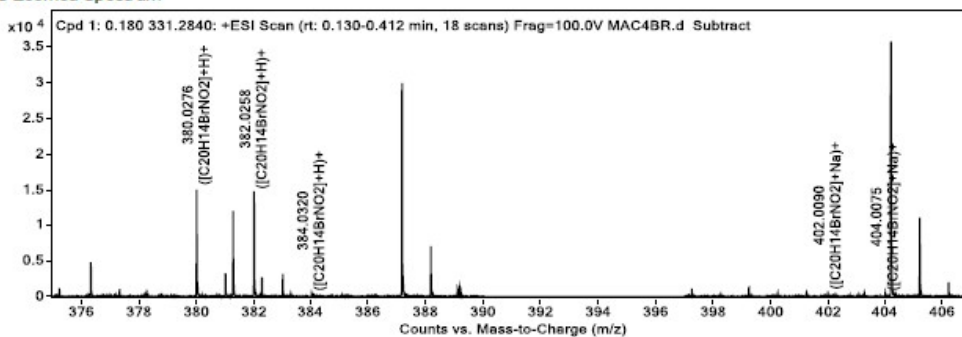

### MS Spectrum Peak List

| m/z      | Calc m/z | Diff(ppm) | z | Abund    | Formula     | Ion     |
|----------|----------|-----------|---|----------|-------------|---------|
| 380.0276 | 380.0281 | 1.33      | 1 | 15341.27 | C20H14BrNO2 | (M+H)+  |
| 381.0312 | 381.0313 | 0.38      | 1 | 3314.55  | C20H14BrNO2 | (M+H)+  |
| 382.0258 | 382.0262 | 1.19      | 1 | 14791.64 | C20H14BrNO2 | (M+H)+  |
| 383.0291 | 383.0294 | 0.74      | 1 | 3153.12  | C20H14BrNO2 | (M+H)+  |
| 384.032  | 384.0323 | 0.63      | 1 | 506.2    | C20H14BrNO2 | (M+H)+  |
| 385.0324 | 385.035  | 6.8       | 1 | 72.76    | C20H14BrNO2 | (M+H)+  |
| 402.009  | 402.01   | 2.43      | 1 | 710.08   | C20H14BrNO2 | (M+Na)+ |
| 403.0116 | 403.0133 | 4.13      | 1 | 159.41   | C20H14BrNO2 | (M+Na)+ |
| 404.0075 | 404.0082 | 1.67      | 1 | 516.49   | C20H14BrNO2 | (M+Na)+ |
| 404.9993 | 405.0113 | 29.8      | 1 | 58.03    | C20H14BrNO2 | (M+Na)+ |

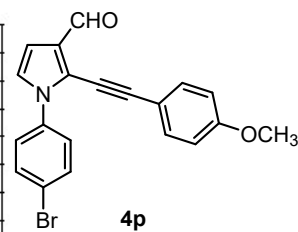

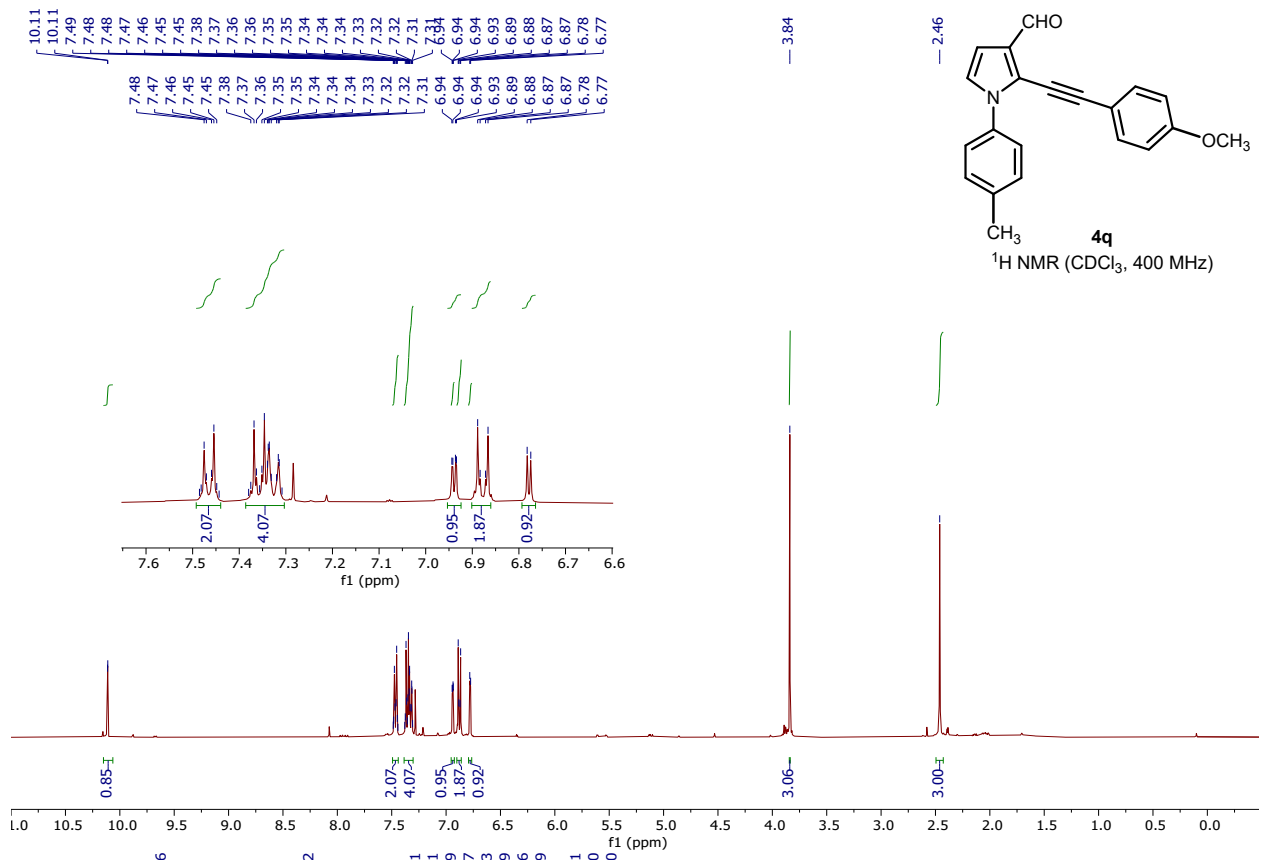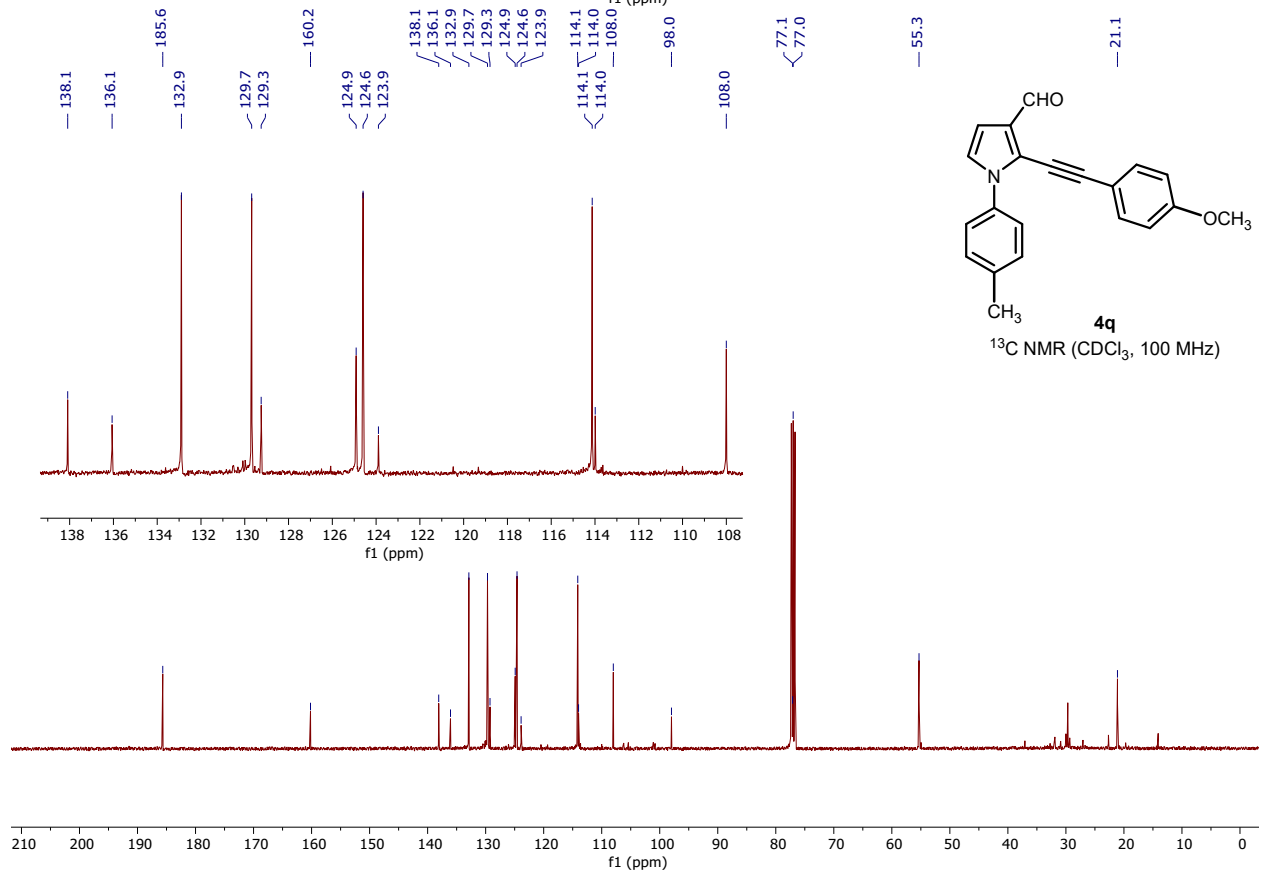

|                        |                                                |               |                      |
|------------------------|------------------------------------------------|---------------|----------------------|
| Data File              | MACME.d                                        | Sample Name   | MACME                |
| Sample Type            | Sample                                         | Position      | P2-A6                |
| Instrument Name        | Instrument 1                                   | User Name     |                      |
| Acq Method             | ChB60ChD40_isocratic_esi_positive_3min.bintu.m | Acquired Time | 6/21/2019 5:25:37 PM |
| IRM Calibration Status | Success                                        | DA Method     | PROCESSNEW.m         |
| Comment                |                                                |               |                      |

|              |      |                |                             |
|--------------|------|----------------|-----------------------------|
| Sample Group |      | Info.          |                             |
| Stream Name  | LC 1 | Acquisition SW | 6200 series TOF/6500 series |
|              |      | Version        | Q-TOF B.06.01 (B6172 SP1)   |

### Compound Table

| Compound Label       | RT    | Mass     | Abund | Formula      | Tgt Mass | Diff (ppm) |
|----------------------|-------|----------|-------|--------------|----------|------------|
| Cpd 1: 1.569 73.0660 | 1.569 | 331.1208 | 528   | C21 H17 N O3 | 331.1208 | -0.14      |

| Compound Label       | m/z      | RT    | Algorithm       | Mass     |
|----------------------|----------|-------|-----------------|----------|
| Cpd 1: 1.569 73.0660 | 332.1281 | 1.569 | Find By Formula | 331.1208 |

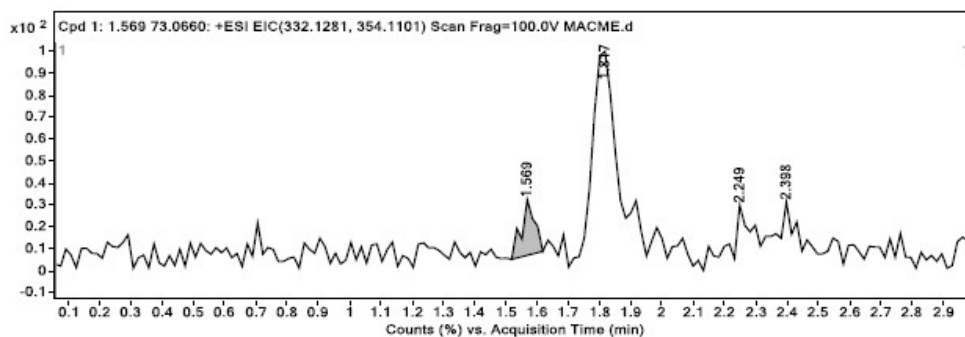

### MS Zoomed Spectrum

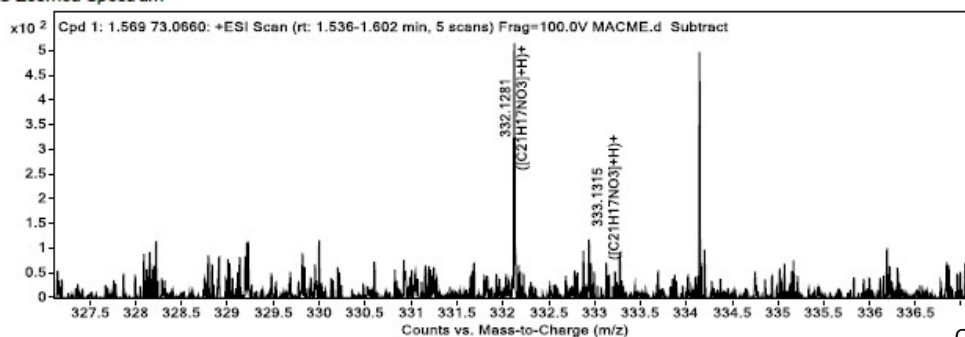

### MS Spectrum Peak List

| m/z      | Calc m/z | Diff(ppm) | z | Abund  | Formula   | Ion    |
|----------|----------|-----------|---|--------|-----------|--------|
| 332.1281 | 332.1281 | 0.2       | 1 | 528.12 | C21H17NO3 | (M+H)+ |
| 333.1315 | 333.1314 | -0.3      | 1 | 71.35  | C21H17NO3 | (M+H)+ |

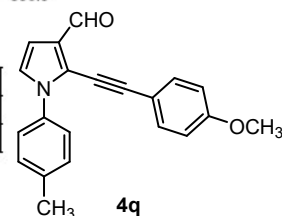

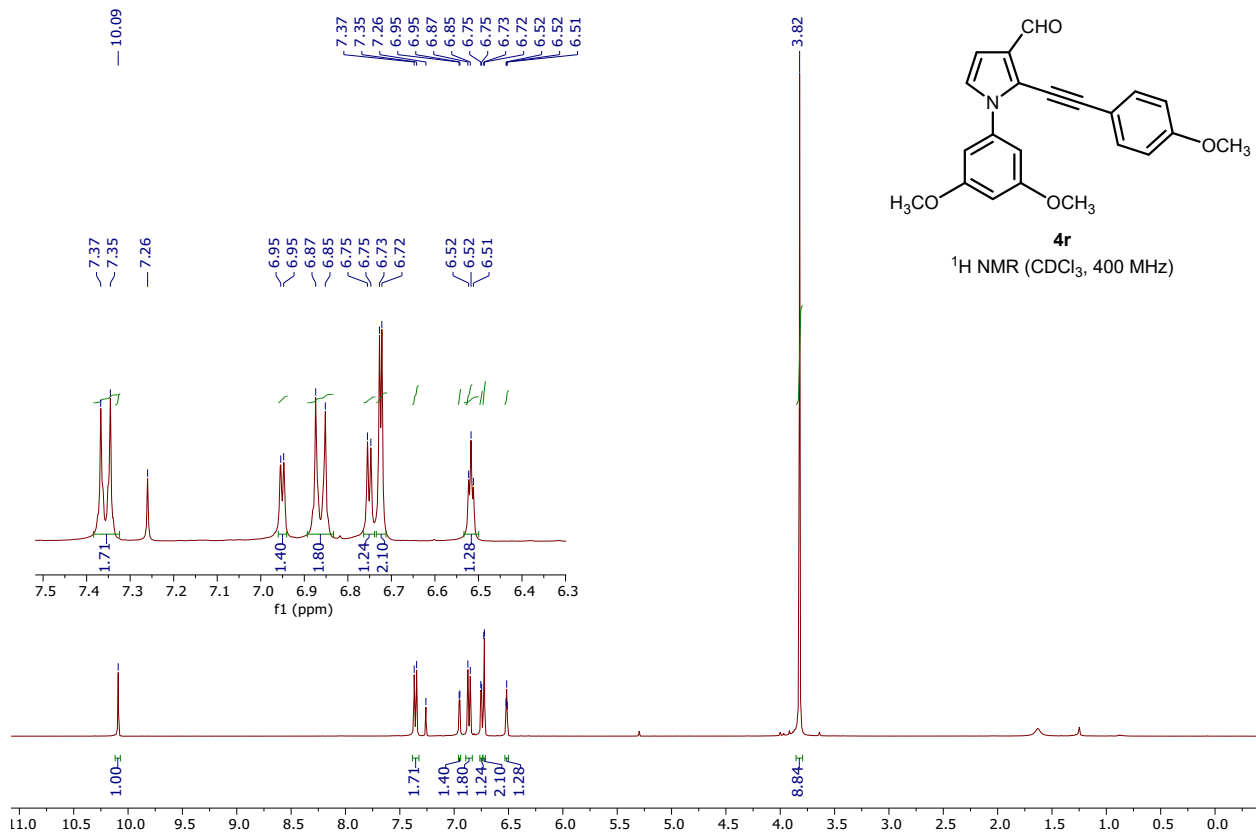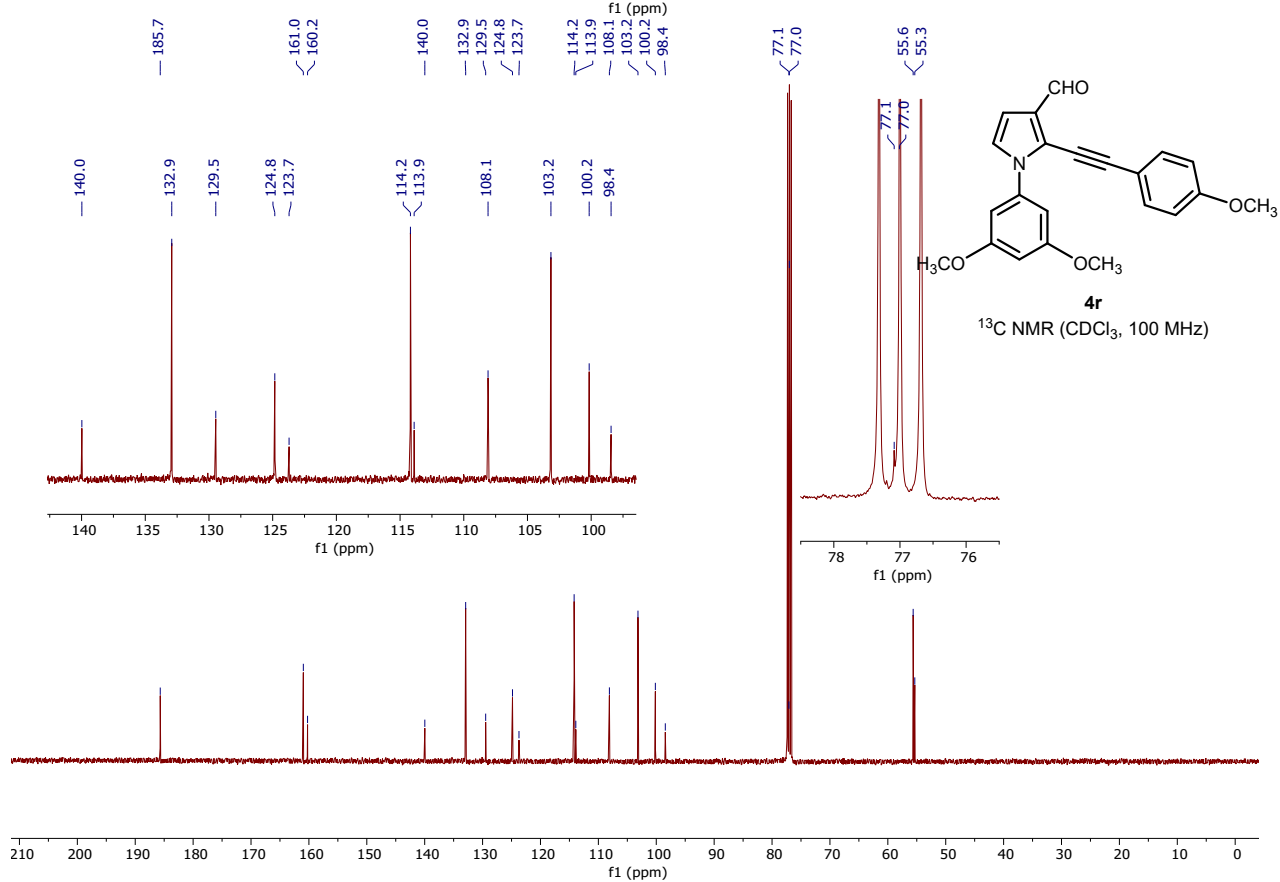

|                               |                                          |                      |                     |
|-------------------------------|------------------------------------------|----------------------|---------------------|
| <b>Data File</b>              | MACDM.d                                  | <b>Sample Name</b>   | MACDM               |
| <b>Sample Type</b>            | Sample                                   | <b>Position</b>      | P1-C7               |
| <b>Instrument Name</b>        | Instrument 1                             | <b>User Name</b>     |                     |
| <b>Acq Method</b>             | ChB60ChD40_isocratic_esi_positive_3min.m | <b>Acquired Time</b> | 5/8/2019 5:47:32 PM |
| <b>IRM Calibration Status</b> | Success                                  | <b>DA Method</b>     | PROCESSNEW.m        |
| <b>Comment</b>                |                                          |                      |                     |

|                     |      |                               |                                                       |
|---------------------|------|-------------------------------|-------------------------------------------------------|
| <b>Sample Group</b> |      | <b>Info.</b>                  |                                                       |
| <b>Stream Name</b>  | LC 1 | <b>Acquisition SW Version</b> | 6200 series TOF/6500 series Q-TOF B.06.01 (B6172 SP1) |

#### Compound Table

| Compound Label        | RT    | Mass     | Abund  | Formula      | Tgt Mass | Diff (ppm) |
|-----------------------|-------|----------|--------|--------------|----------|------------|
| Cpd 1: 0.176 362.1384 | 0.176 | 361.1311 | 105491 | C22 H19 N O4 | 361.1314 | -0.96      |

| Compound Label        | m/z      | RT    | Algorithm       | Mass     |
|-----------------------|----------|-------|-----------------|----------|
| Cpd 1: 0.176 362.1384 | 362.1384 | 0.176 | Find By Formula | 361.1311 |

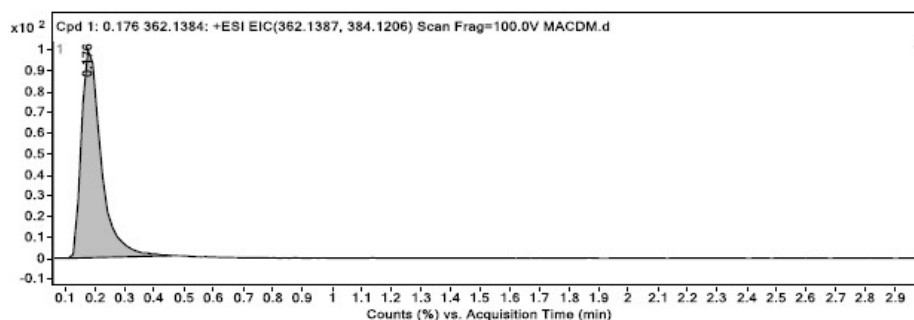

#### MS Zoomed Spectrum

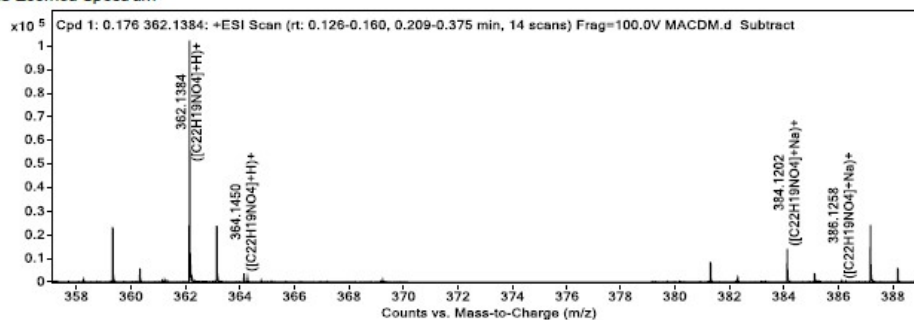

#### MS Spectrum Peak List

| m/z      | Calc m/z | Diff(ppm) | z | Abund    | Formula   | Ion     |
|----------|----------|-----------|---|----------|-----------|---------|
| 362.1384 | 362.1387 | 0.92      | 1 | 105491   | C22H19NO4 | (M+H)+  |
| 363.1416 | 363.142  | 1.08      | 1 | 24772.92 | C22H19NO4 | (M+H)+  |
| 364.145  | 364.1447 | -0.56     | 1 | 3598.46  | C22H19NO4 | (M+H)+  |
| 365.1476 | 365.1474 | -0.33     | 1 | 461.07   | C22H19NO4 | (M+H)+  |
| 384.1202 | 384.1206 | 1.21      | 1 | 14413.23 | C22H19NO4 | (M+Na)+ |
| 385.1235 | 385.1239 | 1.17      | 1 | 3533.77  | C22H19NO4 | (M+Na)+ |
| 386.1258 | 386.1267 | 2.3       | 1 | 570.28   | C22H19NO4 | (M+Na)+ |

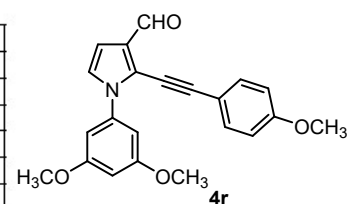

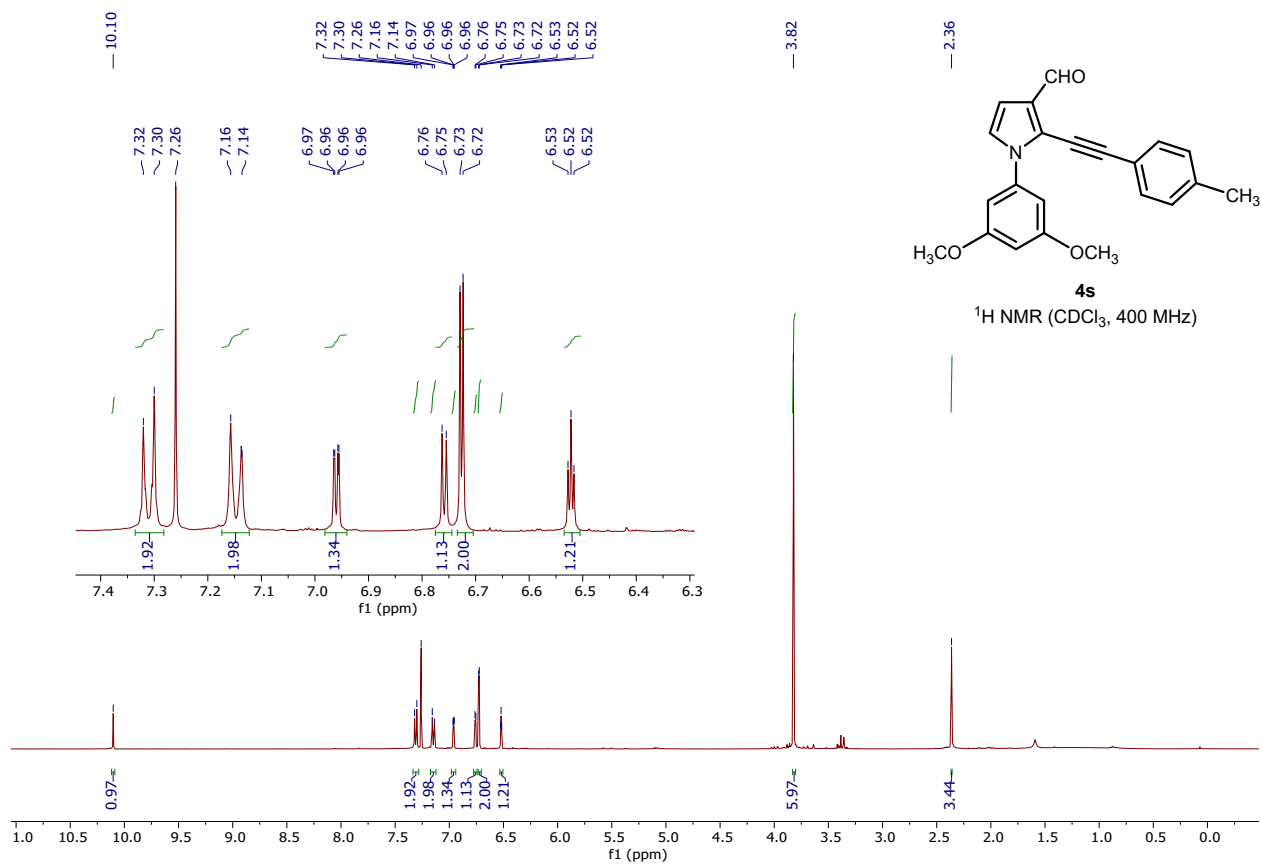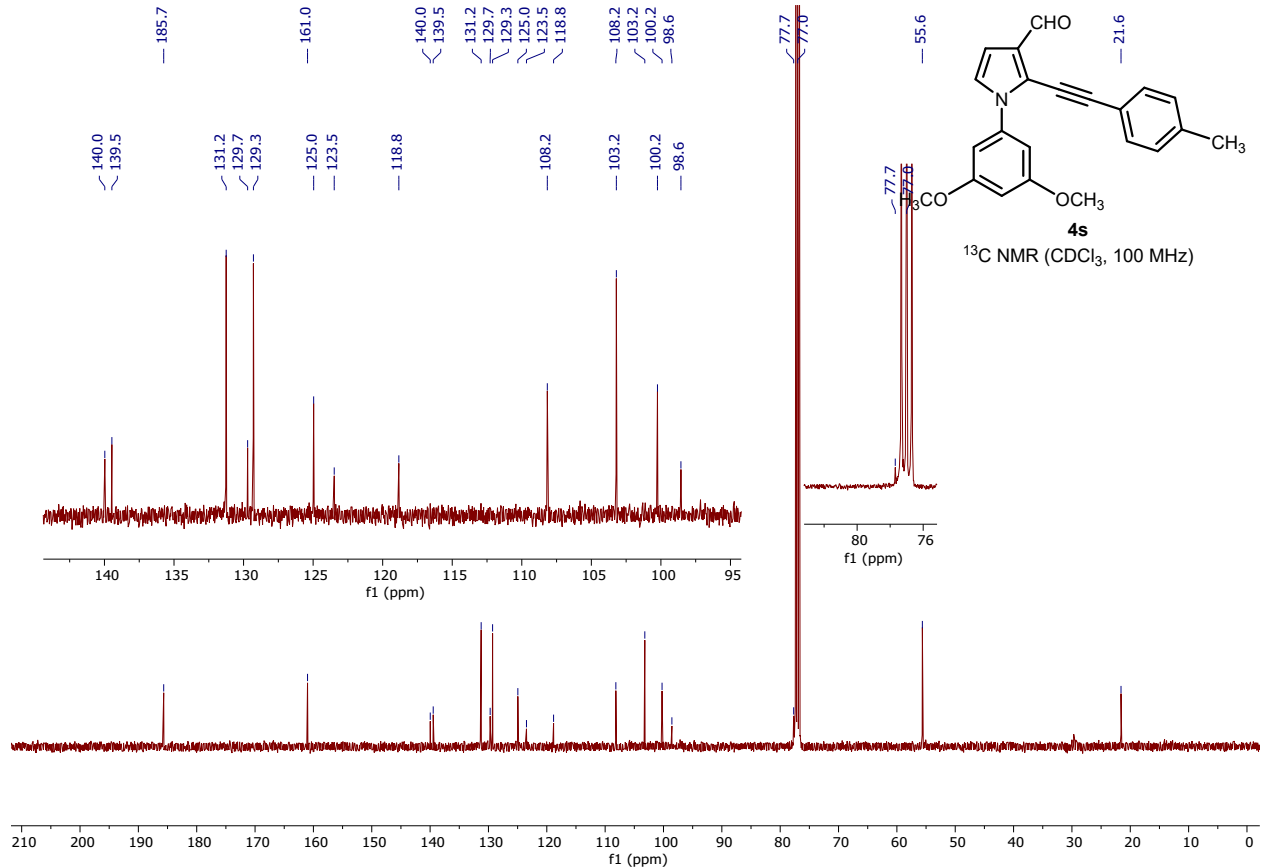





|                        |                                          |               |                     |
|------------------------|------------------------------------------|---------------|---------------------|
| Data File              | AC-4.d                                   | Sample Name   | AC-4                |
| Sample Type            | Sample                                   | Position      | P1-B9               |
| Instrument Name        | Instrument 1                             | User Name     |                     |
| Acq Method             | ChB60ChD40_isocratic_esi_positive_3min.m | Acquired Time | 5/8/2019 5:14:05 PM |
| IRM Calibration Status | Success                                  | DA Method     | PROCESSNEW.m        |
| Comment                |                                          |               |                     |

|              |      |                |                             |
|--------------|------|----------------|-----------------------------|
| Sample Group |      | Info.          |                             |
| Stream Name  | LC 1 | Acquisition SW | 6200 series TOF/6500 series |
|              |      | Version        | Q-TOF B.06.01 (B6172 SP1)   |

### Compound Table

| Compound Label        | RT    | Mass     | Abund | Formula      | Tgt Mass | Diff (ppm) |
|-----------------------|-------|----------|-------|--------------|----------|------------|
| Cpd 1: 0.181 346.1438 | 0.181 | 345.1366 | 5654  | C22 H19 N O3 | 345.1365 | 0.23       |

| Compound Label        | m/z      | RT    | Algorithm       | Mass     |
|-----------------------|----------|-------|-----------------|----------|
| Cpd 1: 0.181 346.1438 | 368.1256 | 0.181 | Find By Formula | 345.1366 |

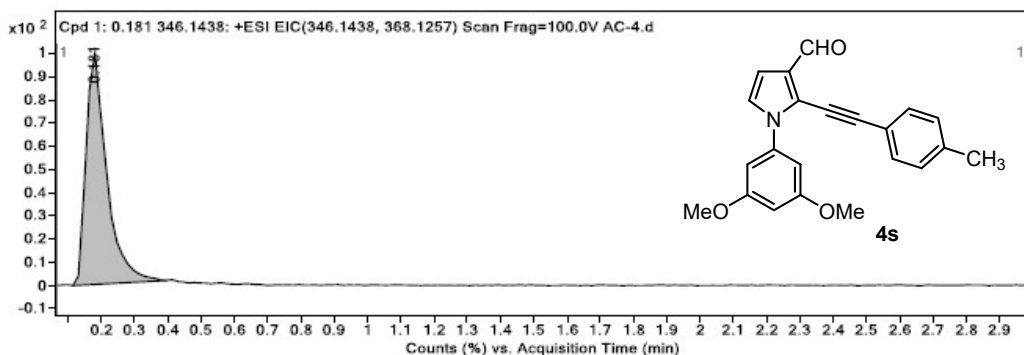

### MS Zoomed Spectrum

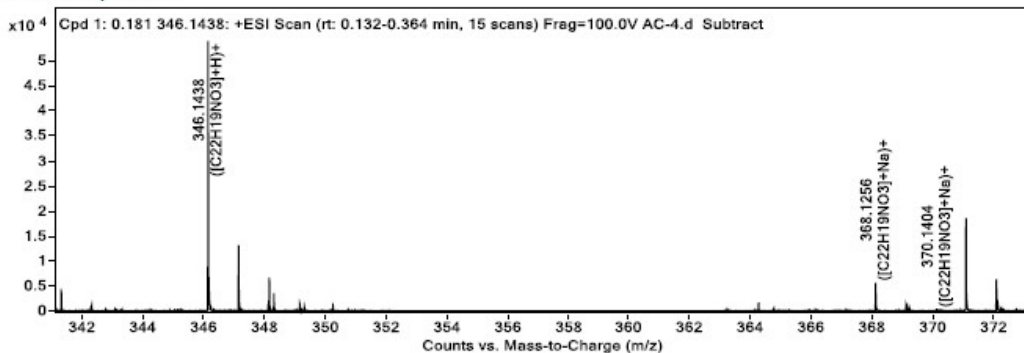

### MS Spectrum Peak List

| m/z      | Calc m/z | Diff(ppm) | z | Abund    | Formula   | Ion     |
|----------|----------|-----------|---|----------|-----------|---------|
| 346.1438 | 346.1438 | -0.16     | 1 | 54563.42 | C22H19NO3 | (M+H)+  |
| 347.1471 | 347.1471 | -0.25     | 1 | 13207.87 | C22H19NO3 | (M+H)+  |
| 368.1256 | 368.1257 | 0.3       | 1 | 5653.64  | C22H19NO3 | (M+Na)+ |
| 369.1286 | 369.129  | 1.14      | 1 | 1387.26  | C22H19NO3 | (M+Na)+ |
| 370.1404 | 370.1319 | -23.03    | 1 | 352.6    | C22H19NO3 | (M+Na)+ |

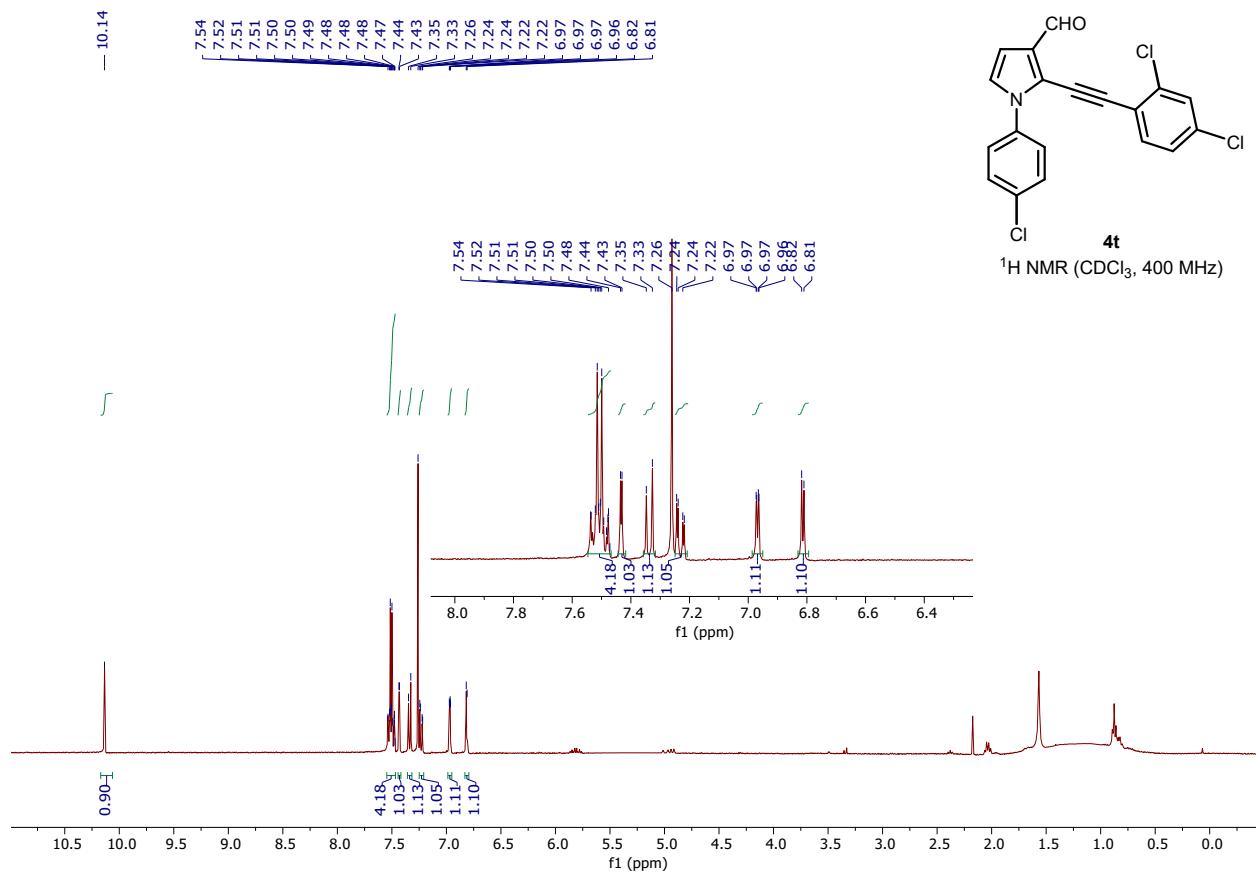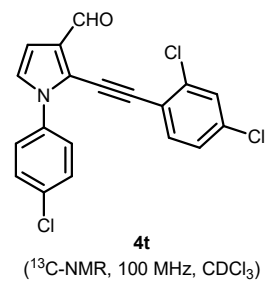

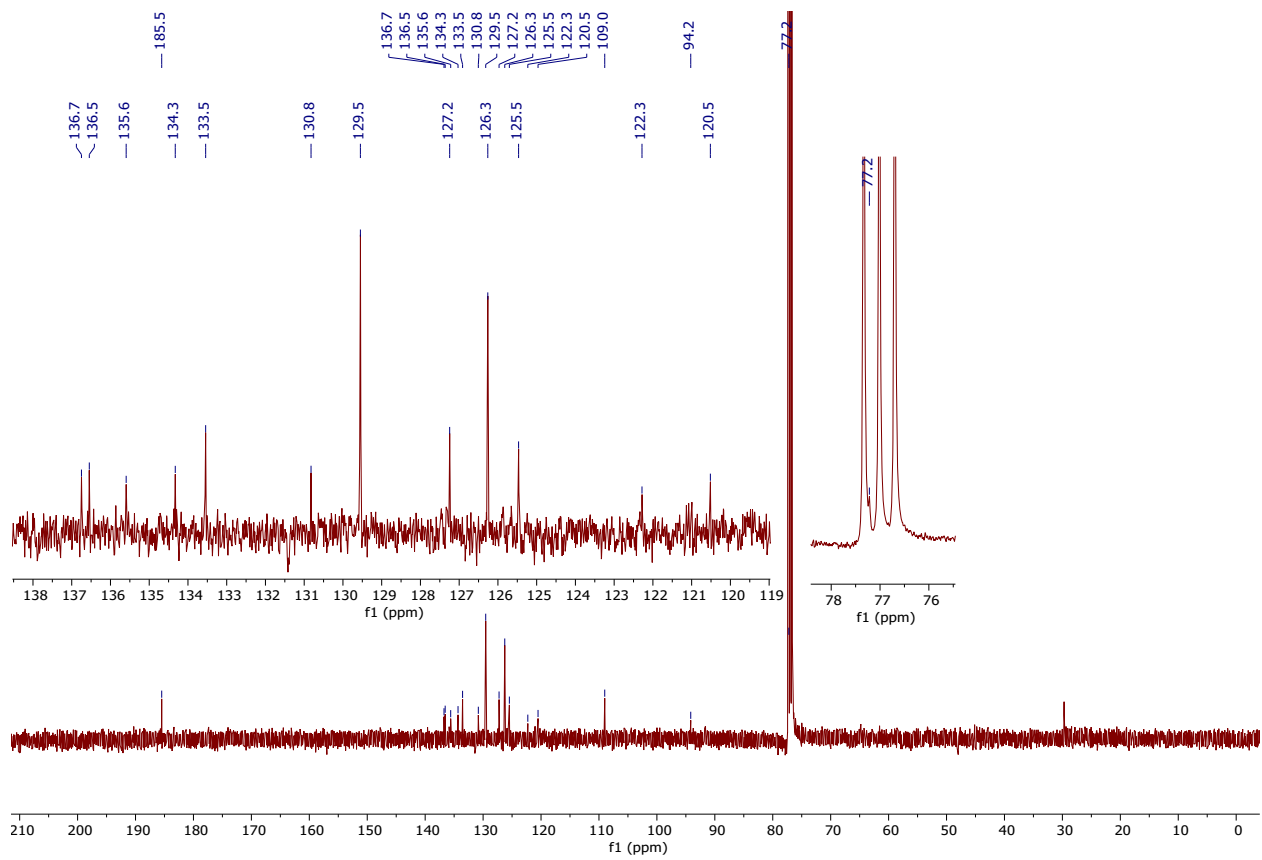

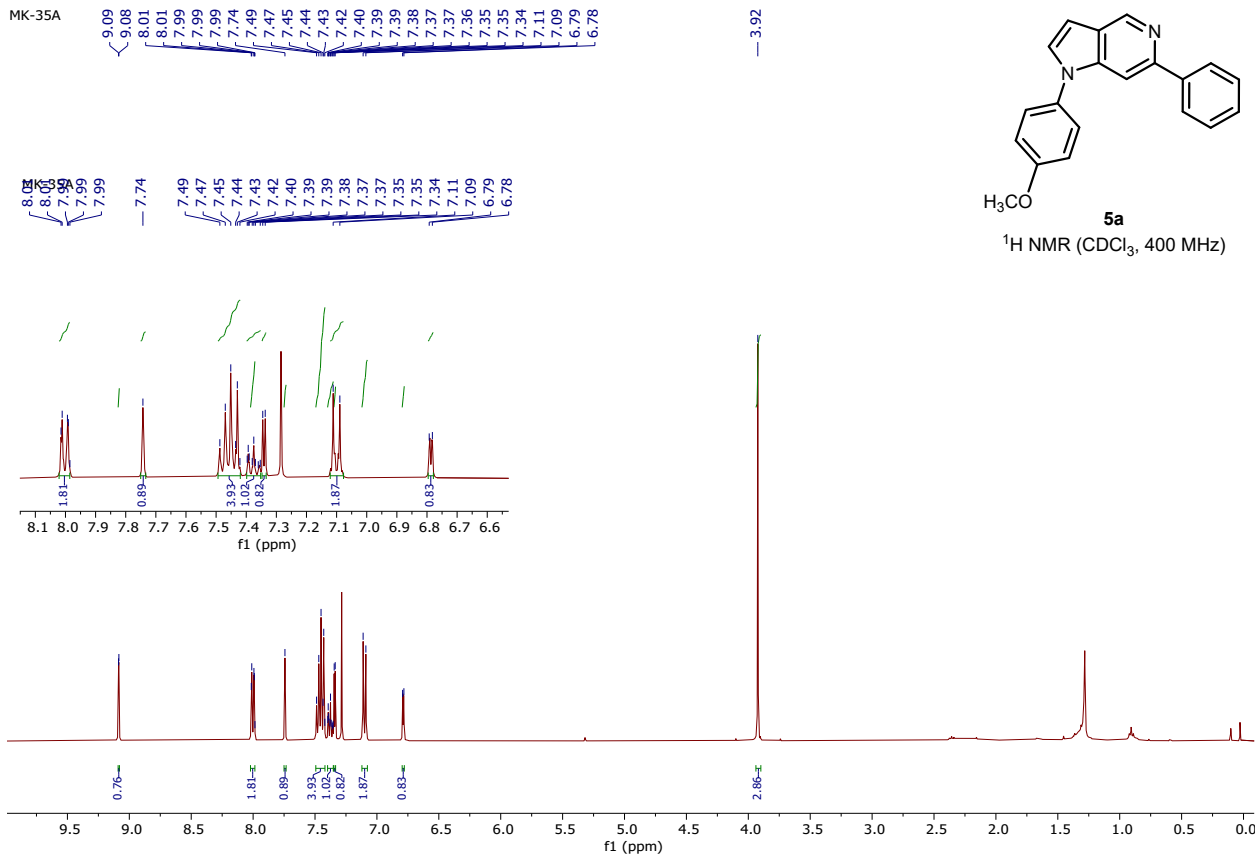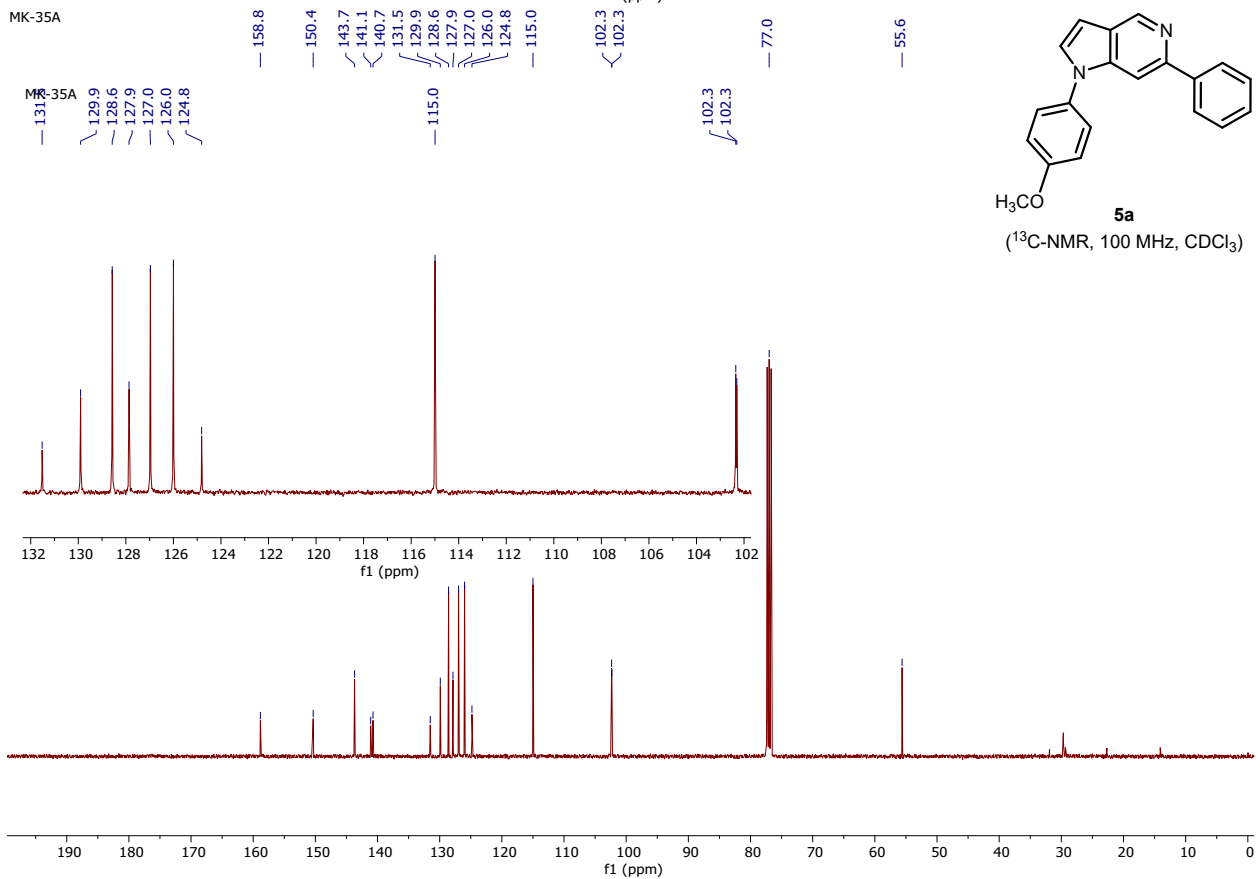

|                        |                                                |               |                      |
|------------------------|------------------------------------------------|---------------|----------------------|
| Data File              | AC1AM.d                                        | Sample Name   | AC1AM                |
| Sample Type            | Sample                                         | Position      | P2-A8                |
| Instrument Name        | Instrument 1                                   | User Name     |                      |
| Acq Method             | ChB60ChD40_isocratic_esi_positive_3min.bintu.m | Acquired Time | 6/21/2019 5:42:15 PM |
| IRM Calibration Status | Success                                        | DA Method     | PROCESSNEW.m         |
| Comment                |                                                |               |                      |

|              |      |                |                             |
|--------------|------|----------------|-----------------------------|
| Sample Group |      | Info.          |                             |
| Stream Name  | LC 1 | Acquisition SW | 6200 series TOF/6500 series |
|              |      | Version        | Q-TOF B.06.01 (B6172 SP1)   |

### Compound Table

| Compound Label        | RT    | Mass     | Abund  | Formula      | Tgt Mass | Diff (ppm) |
|-----------------------|-------|----------|--------|--------------|----------|------------|
| Cpd 1: 0.535 301.1327 | 0.535 | 300.1254 | 109002 | C20 H16 N2 O | 300.1263 | -2.8       |

| Compound Label        | m/z      | RT    | Algorithm       | Mass     |
|-----------------------|----------|-------|-----------------|----------|
| Cpd 1: 0.535 301.1327 | 301.1327 | 0.535 | Find By Formula | 300.1254 |

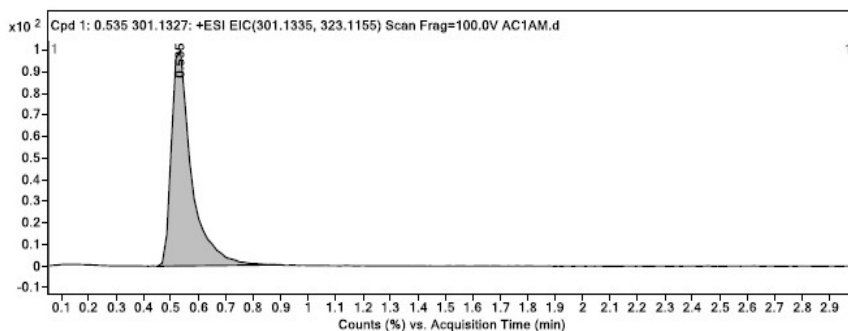

### MS Zoomed Spectrum

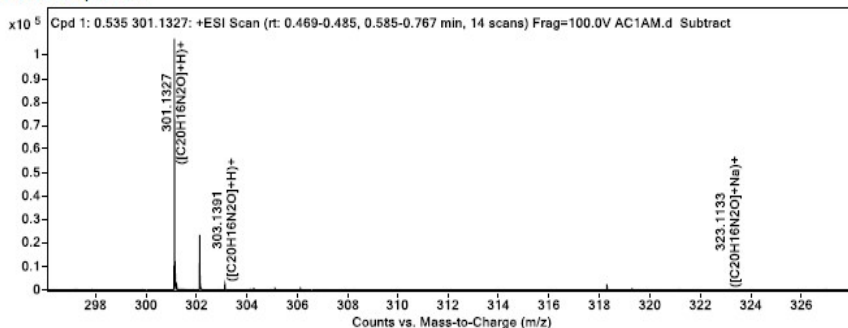

### MS Spectrum Peak List

| m/z      | Calc m/z | Diff(ppm) | z | Abund     | Formula   | Ion     |
|----------|----------|-----------|---|-----------|-----------|---------|
| 301.1327 | 301.1335 | 2.79      | 1 | 109001.56 | C20H16N2O | (M+H)+  |
| 302.1359 | 302.1367 | 2.84      | 1 | 24236.32  | C20H16N2O | (M+H)+  |
| 303.1391 | 303.1397 | 2.2       | 1 | 2619.28   | C20H16N2O | (M+H)+  |
| 304.1418 | 304.1426 | 2.62      | 1 | 248.62    | C20H16N2O | (M+H)+  |
| 323.1133 | 323.1155 | 6.78      | 1 | 110.54    | C20H16N2O | (M+Na)+ |

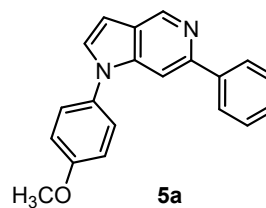

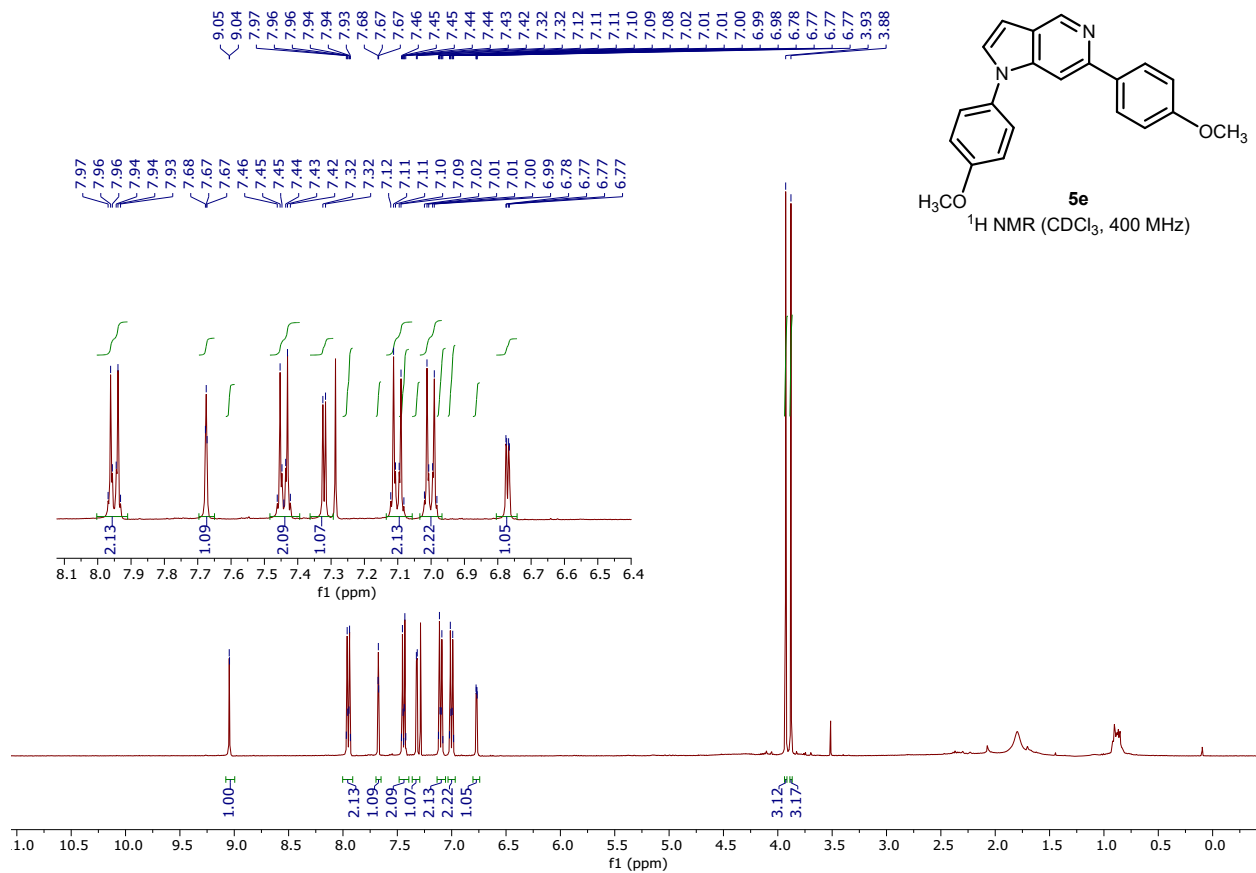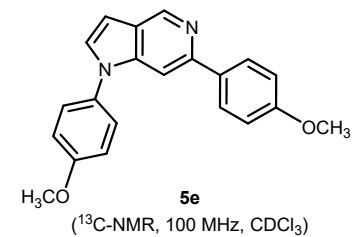

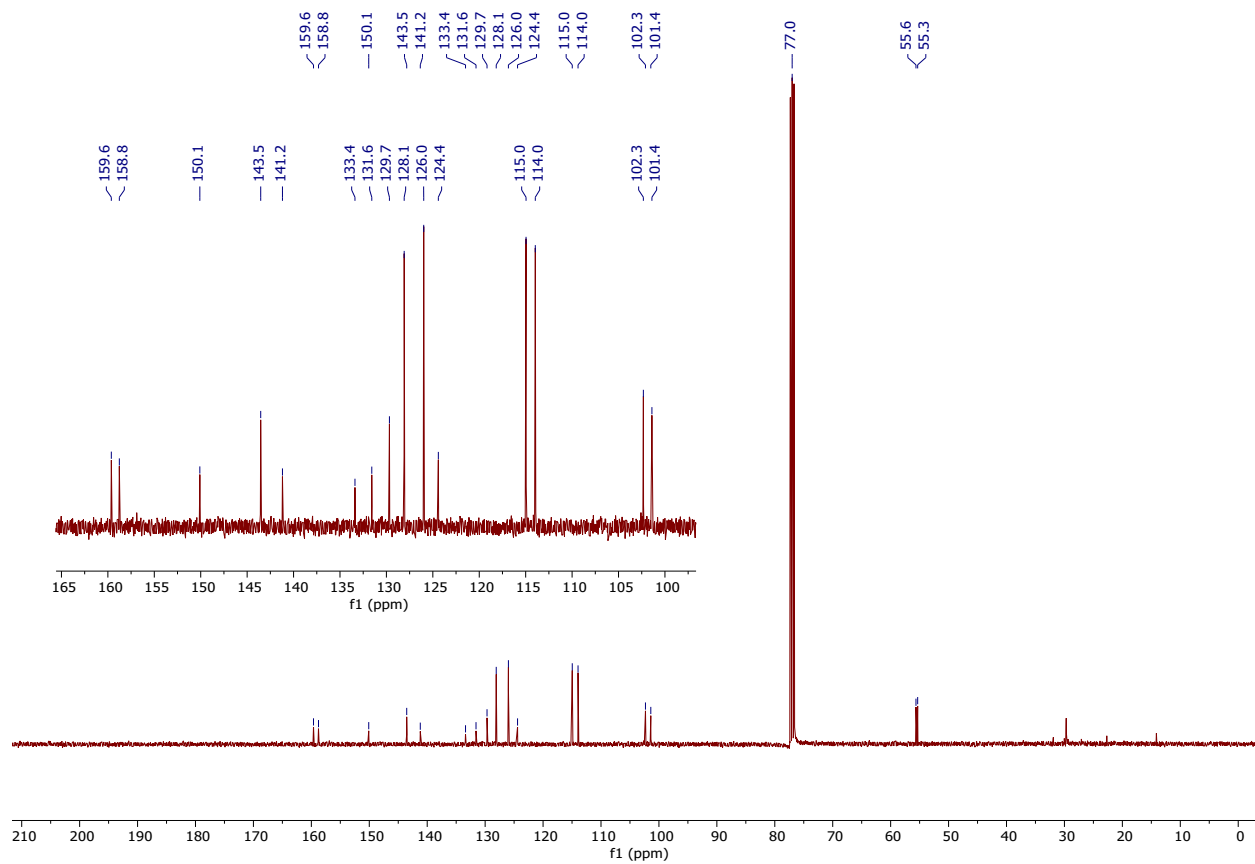

|                        |                                          |               |                      |
|------------------------|------------------------------------------|---------------|----------------------|
| Data File              | MACOMEAM.d                               | Sample Name   | MACOMEAM             |
| Sample Type            | Sample                                   | Position      | P1-E8                |
| Instrument Name        | Instrument 1                             | User Name     |                      |
| Acq Method             | ChB60ChD40_isocratic_esi_positive_3min.m | Acquired Time | 6/24/2019 1:09:50 PM |
| IRM Calibration Status | Success                                  | DA Method     | PROCESSNEW.m         |
| Comment                |                                          |               |                      |

|              |      |                |                             |
|--------------|------|----------------|-----------------------------|
| Sample Group |      | Info.          |                             |
| Stream Name  | LC 1 | Acquisition SW | 6200 series TOF/6500 series |
|              |      | Version        | Q-TOF B.06.01 (B6172 SP1)   |

#### Compound Table

| Compound Label        | RT    | Mass     | Abund  | Formula       | Tgt Mass | Diff (ppm) |
|-----------------------|-------|----------|--------|---------------|----------|------------|
| Cpd 1: 0.191 331.1458 | 0.191 | 330.1386 | 128784 | C21 H18 N2 O2 | 330.1368 | 5.31       |

| Compound Label        | m/z      | RT    | Algorithm       | Mass     |
|-----------------------|----------|-------|-----------------|----------|
| Cpd 1: 0.191 331.1458 | 331.1458 | 0.191 | Find By Formula | 330.1386 |

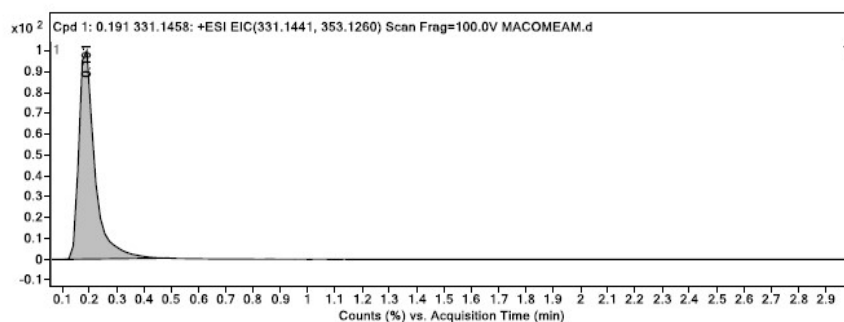

#### MS Zoomed Spectrum

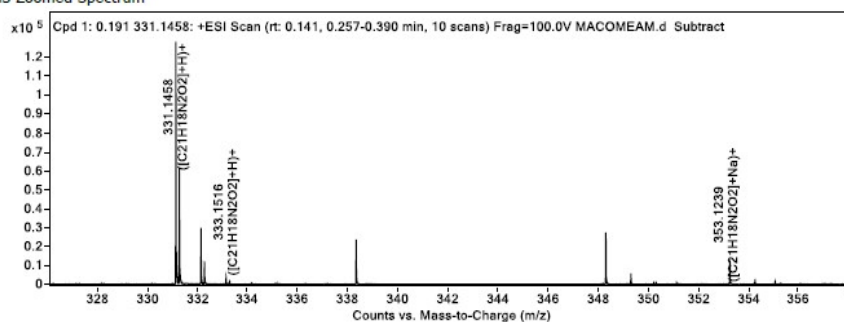

#### MS Spectrum Peak List

| m/z      | Calc m/z | Diff(ppm) | z | Abund     | Formula    | Ion     |
|----------|----------|-----------|---|-----------|------------|---------|
| 331.1458 | 331.1441 | -5.24     | 1 | 128783.57 | C21H18N2O2 | (M+H)+  |
| 332.1492 | 332.1473 | -5.67     | 1 | 29913.06  | C21H18N2O2 | (M+H)+  |
| 333.1516 | 333.1502 | -4.35     | 1 | 3601.38   | C21H18N2O2 | (M+H)+  |
| 334.155  | 334.1529 | -6.15     | 1 | 388.43    | C21H18N2O2 | (M+H)+  |
| 353.1239 | 353.126  | 6.2       | 1 | 159.86    | C21H18N2O2 | (M+Na)+ |

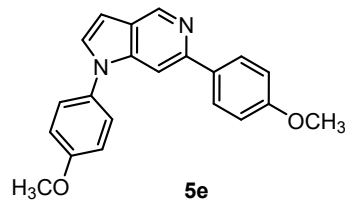



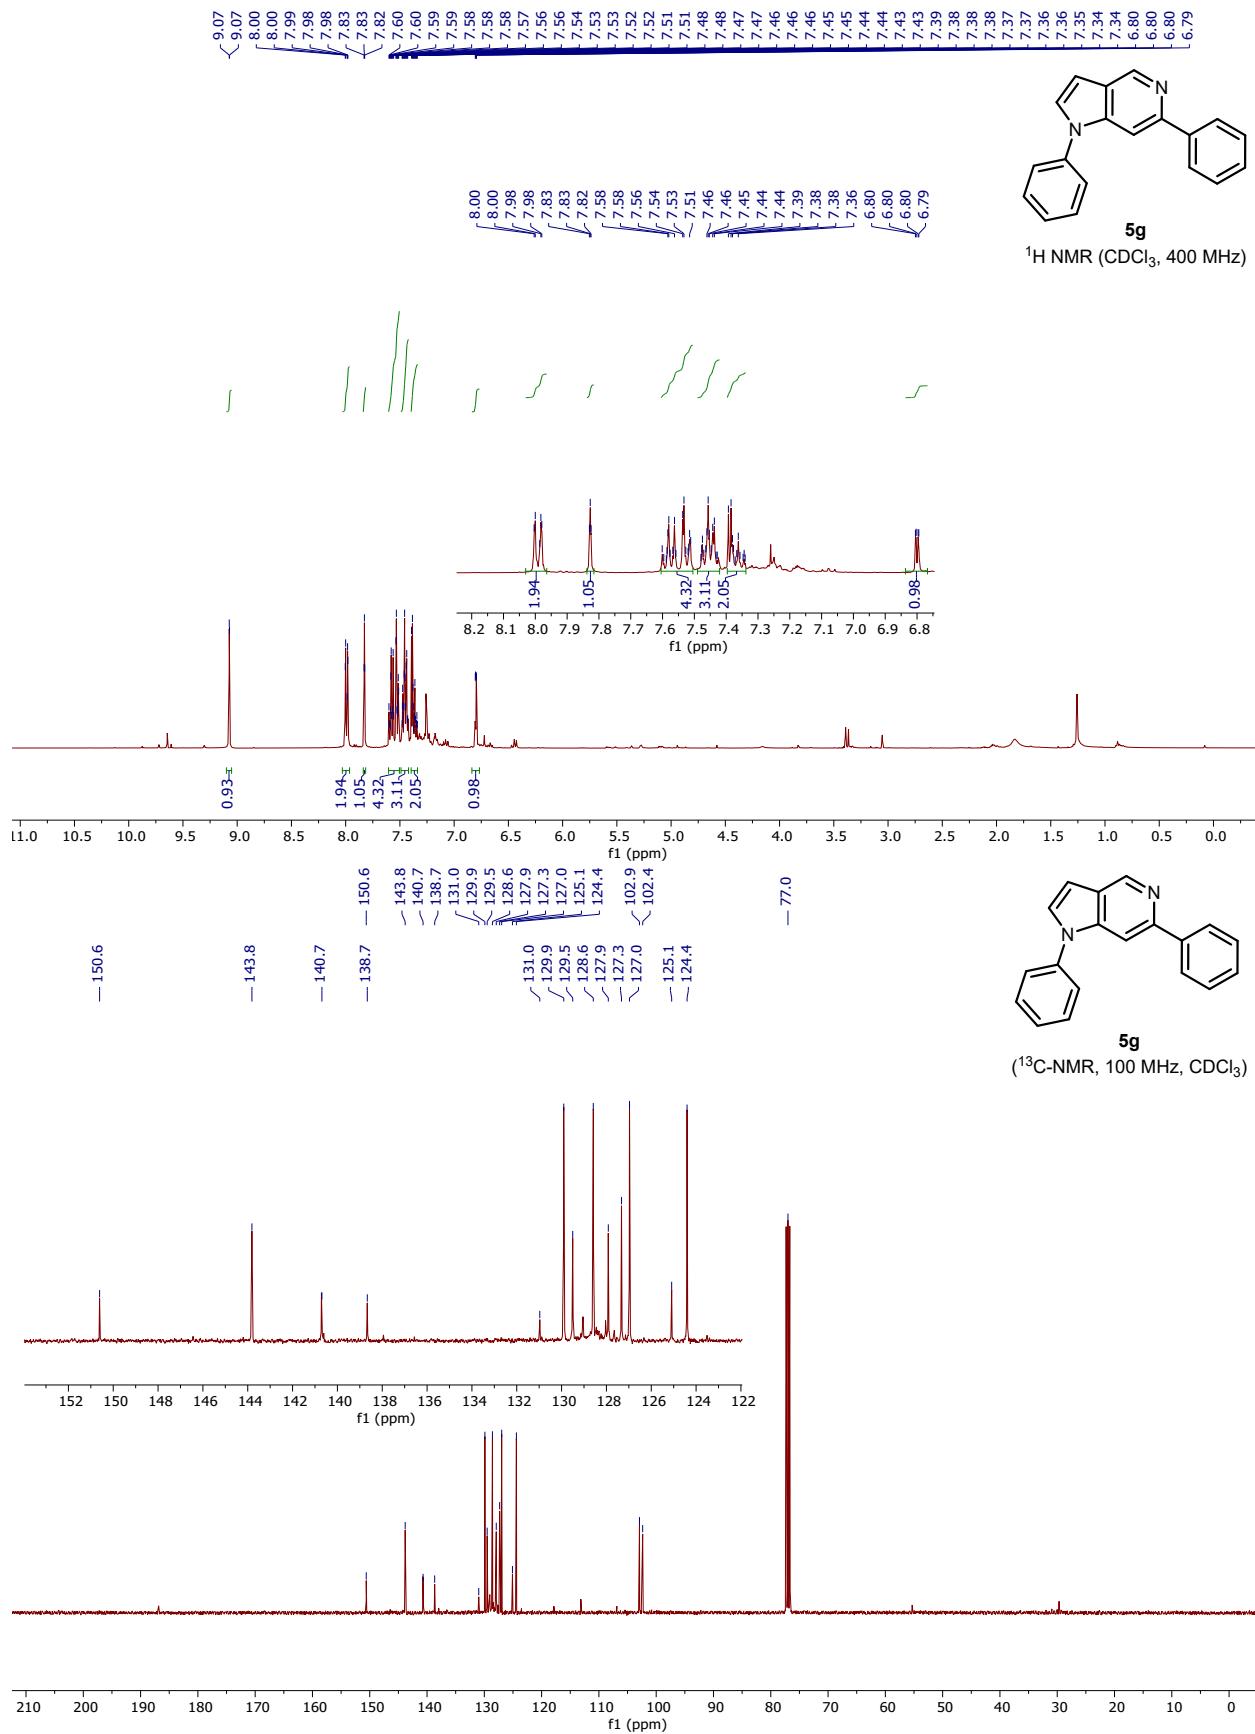

|                               |                                          |                      |                       |
|-------------------------------|------------------------------------------|----------------------|-----------------------|
| <b>Data File</b>              | ACPHAM.d                                 | <b>Sample Name</b>   | ACPHAM                |
| <b>Sample Type</b>            | Sample                                   | <b>Position</b>      | P1-E4                 |
| <b>Instrument Name</b>        | Instrument 1                             | <b>User Name</b>     |                       |
| <b>Acq Method</b>             | ChB60ChD40_isocratic_esi_positive_3min.m | <b>Acquired Time</b> | 6/24/2019 12:44:47 PM |
| <b>IRM Calibration Status</b> | Success                                  | <b>DA Method</b>     | PROCESSNEW.m          |
| <b>Comment</b>                |                                          |                      |                       |

|                     |      |                       |                             |
|---------------------|------|-----------------------|-----------------------------|
| <b>Sample Group</b> |      | <b>Info.</b>          |                             |
| <b>Stream Name</b>  | LC 1 | <b>Acquisition SW</b> | 6200 series TOF/6500 series |
|                     |      | <b>Version</b>        | Q-TOF B.06.01 (B6172 SP1)   |

### Compound Table

| Compound Label        | RT    | Mass    | Abund  | Formula  | Tgt Mass | Diff (ppm) |
|-----------------------|-------|---------|--------|----------|----------|------------|
| Cpd 1: 0.177 271.1243 | 0.177 | 270.117 | 189624 | C19H14N2 | 270.1157 | 4.83       |

| Compound Label        | m/z      | RT    | Algorithm       | Mass    |
|-----------------------|----------|-------|-----------------|---------|
| Cpd 1: 0.177 271.1243 | 271.1243 | 0.177 | Find By Formula | 270.117 |

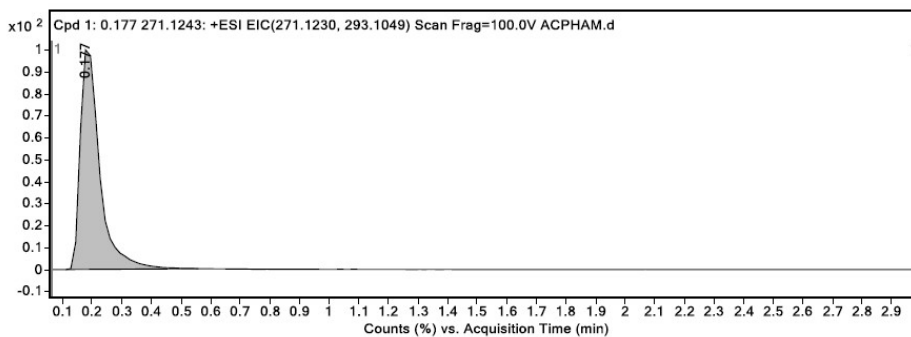

### MS Zoomed Spectrum

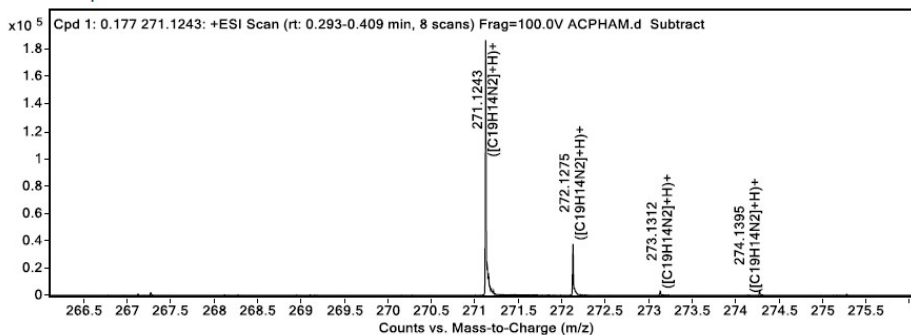

### MS Spectrum Peak List

| m/z      | Calc m/z | Diff(ppm) | z | Abund     | Formula  | Ion                |
|----------|----------|-----------|---|-----------|----------|--------------------|
| 271.1243 | 271.123  | -4.72     | 1 | 189624.17 | C19H14N2 | (M+H) <sup>+</sup> |
| 272.1275 | 272.1261 | -4.92     | 1 | 38635     | C19H14N2 | (M+H) <sup>+</sup> |
| 273.1312 | 273.1293 | -7.17     | 1 | 3255.94   | C19H14N2 | (M+H) <sup>+</sup> |
| 274.1395 | 274.1324 | -25.73    | 1 | 191.39    | C19H14N2 | (M+H) <sup>+</sup> |

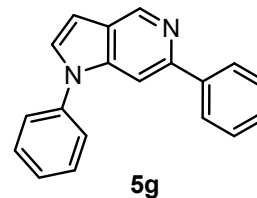

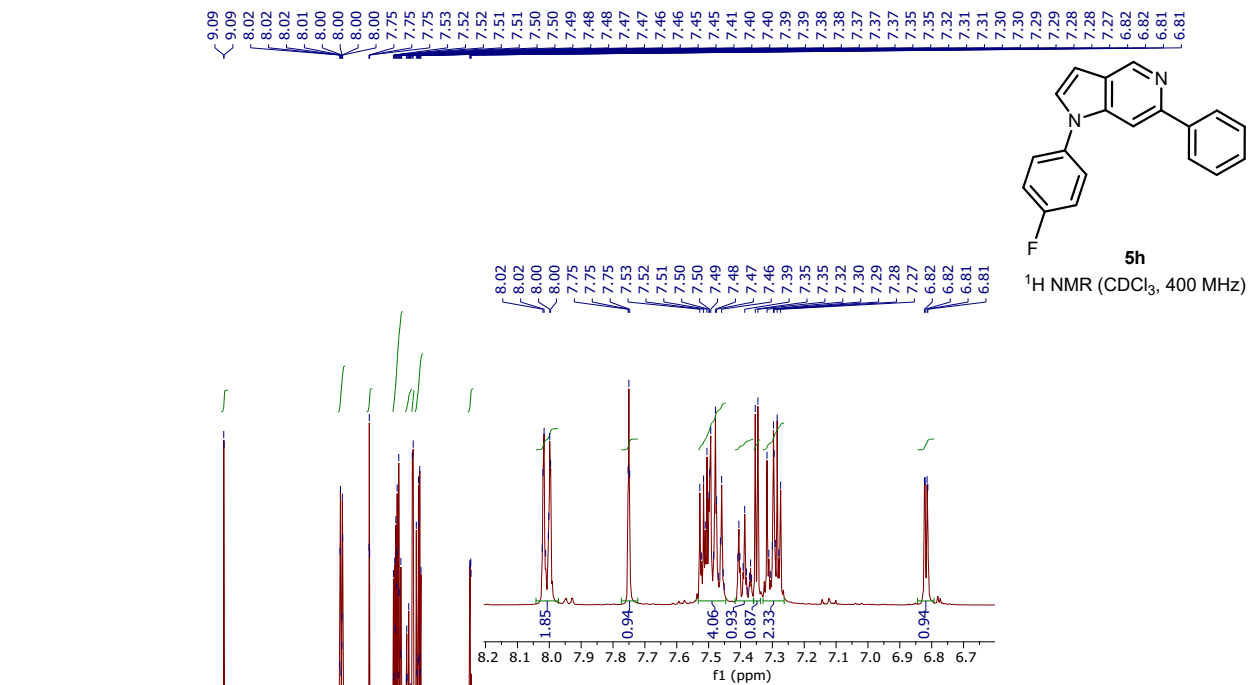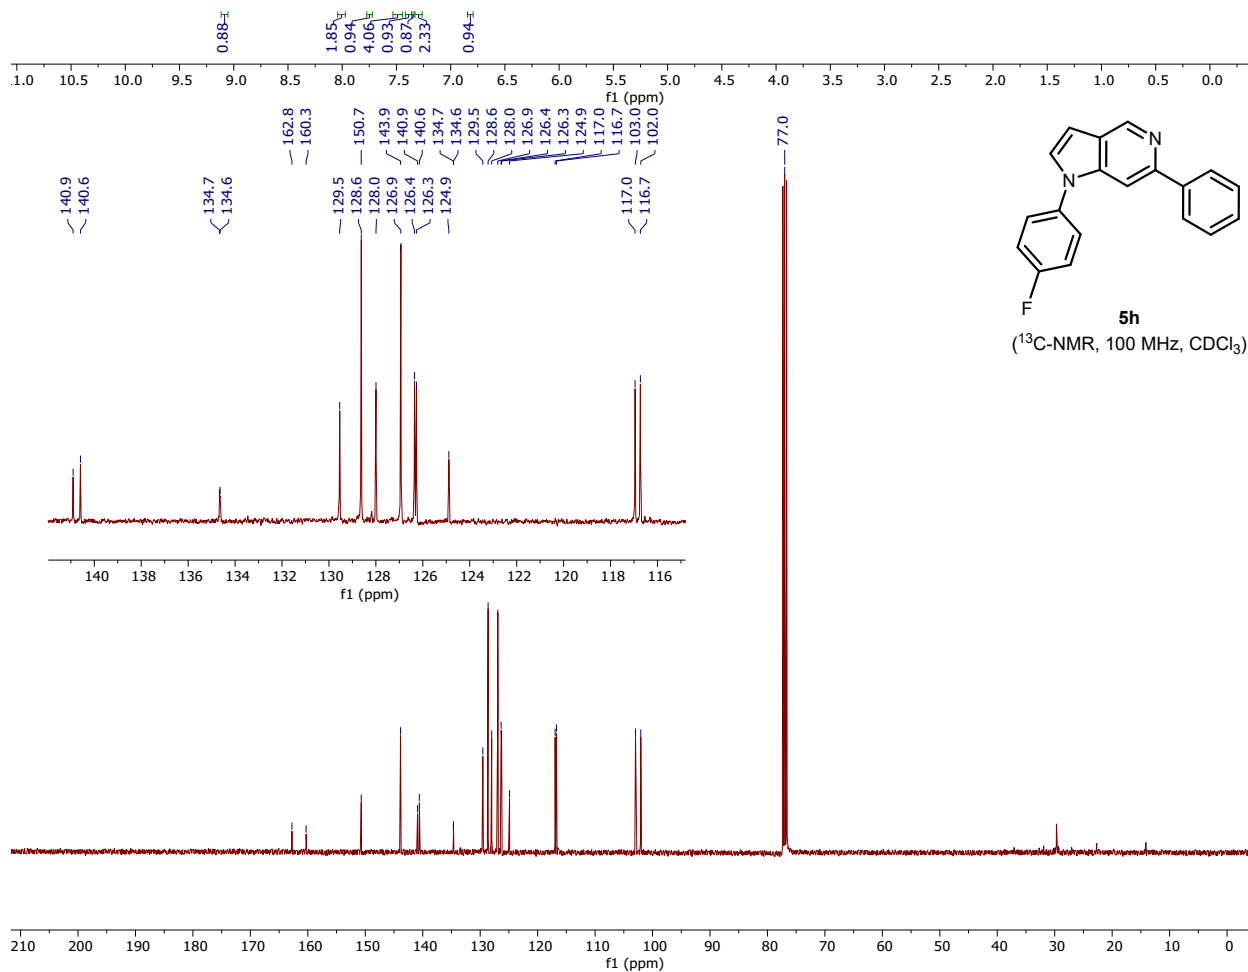

|                        |                                          |               |                       |
|------------------------|------------------------------------------|---------------|-----------------------|
| Data File              | AC4FAM.d                                 | Sample Name   | AC4FAM                |
| Sample Type            | Sample                                   | Position      | P1-E2                 |
| Instrument Name        | Instrument 1                             | User Name     |                       |
| Acq Method             | ChB60ChD40_isocratic_esi_positive_3min.m | Acquired Time | 6/24/2019 12:28:03 PM |
| IRM Calibration Status | Success                                  | DA Method     | PROCESSNEW.m          |
| Comment                |                                          |               |                       |

|              |      |                |                             |
|--------------|------|----------------|-----------------------------|
| Sample Group |      | Info.          |                             |
| Stream Name  | LC 1 | Acquisition SW | 6200 series TOF/6500 series |
|              |      | Version        | Q-TOF B.06.01 (B6172 SP1)   |

#### Compound Table

| Compound Label        | RT    | Mass     | Abund | Formula      | Tgt Mass | Diff (ppm) |
|-----------------------|-------|----------|-------|--------------|----------|------------|
| Cpd 1: 0.188 404.2065 | 0.188 | 288.1054 | 7995  | C19 H13 F N2 | 288.1063 | -2.99      |

| Compound Label        | m/z      | RT    | Algorithm       | Mass     |
|-----------------------|----------|-------|-----------------|----------|
| Cpd 1: 0.188 404.2065 | 289.1129 | 0.188 | Find By Formula | 288.1054 |

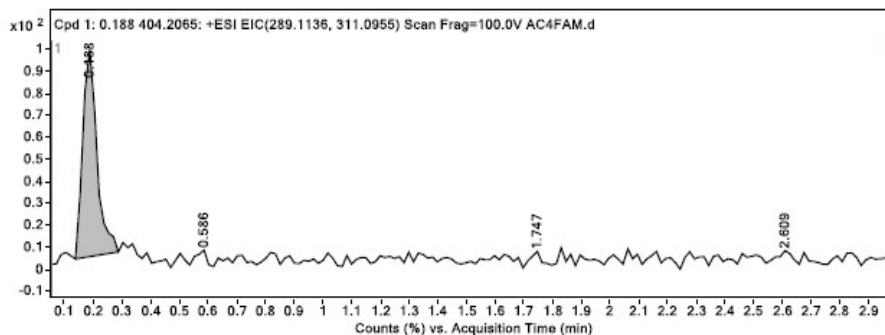

#### MS Zoomed Spectrum

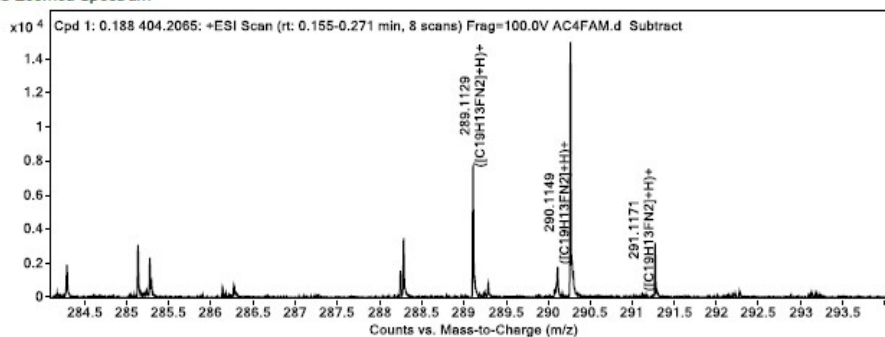

#### MS Spectrum Peak List

| m/z      | Calc m/z | Diff(ppm) | z | Abund   | Formula   | Ion    |
|----------|----------|-----------|---|---------|-----------|--------|
| 289.1129 | 289.1136 | 2.09      | 1 | 7995.41 | C19H13FN2 | (M+H)+ |
| 290.1149 | 290.1167 | 6.09      | 1 | 1805.73 | C19H13FN2 | (M+H)+ |
| 291.1171 | 291.1199 | 9.53      | 1 | 218.33  | C19H13FN2 | (M+H)+ |

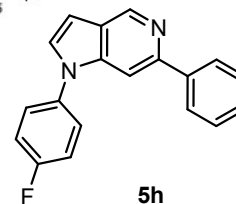

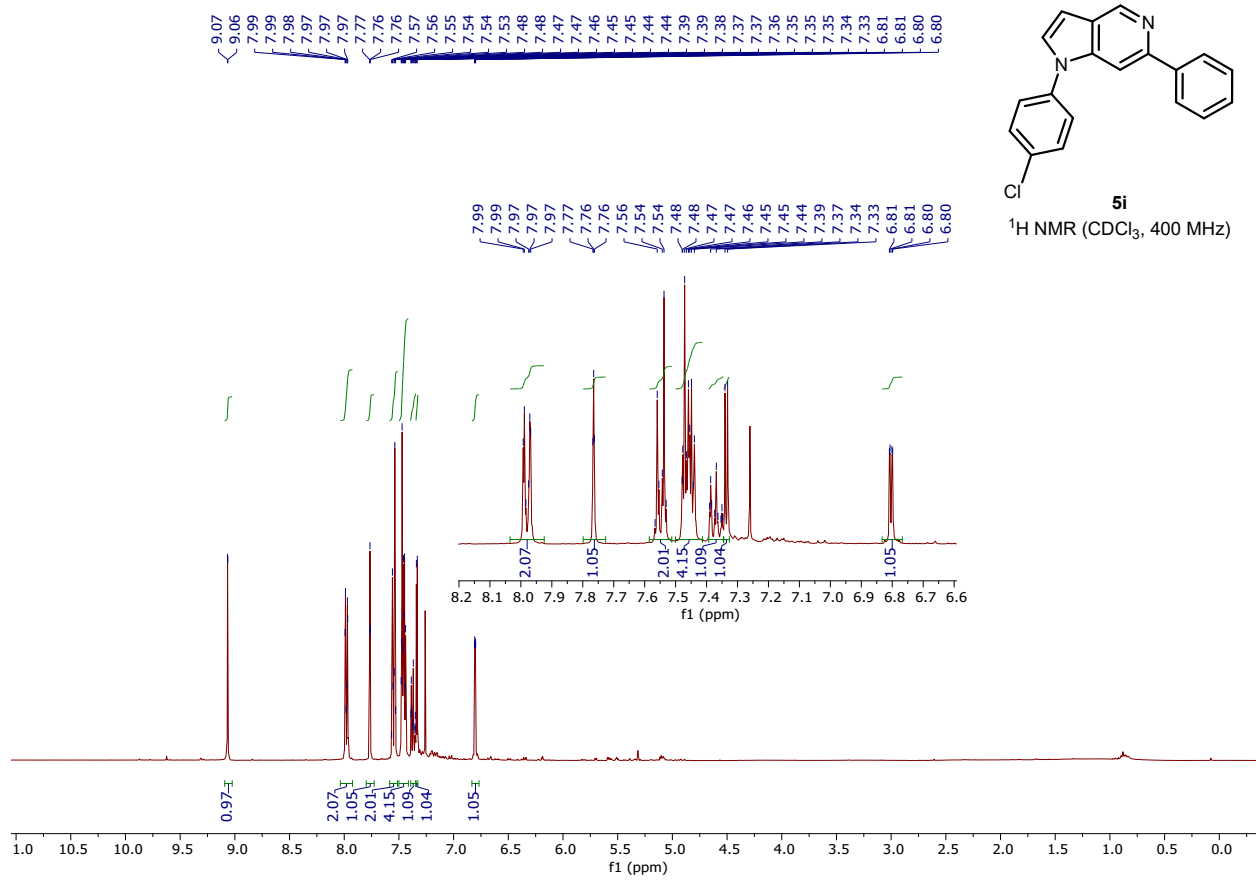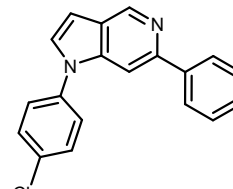

**5i**

<sup>1</sup>H NMR (CDCl<sub>3</sub>, 400 MHz)

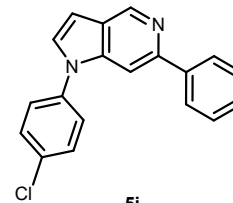

**5i**

(<sup>13</sup>C-NMR, 100 MHz, CDCl<sub>3</sub>)

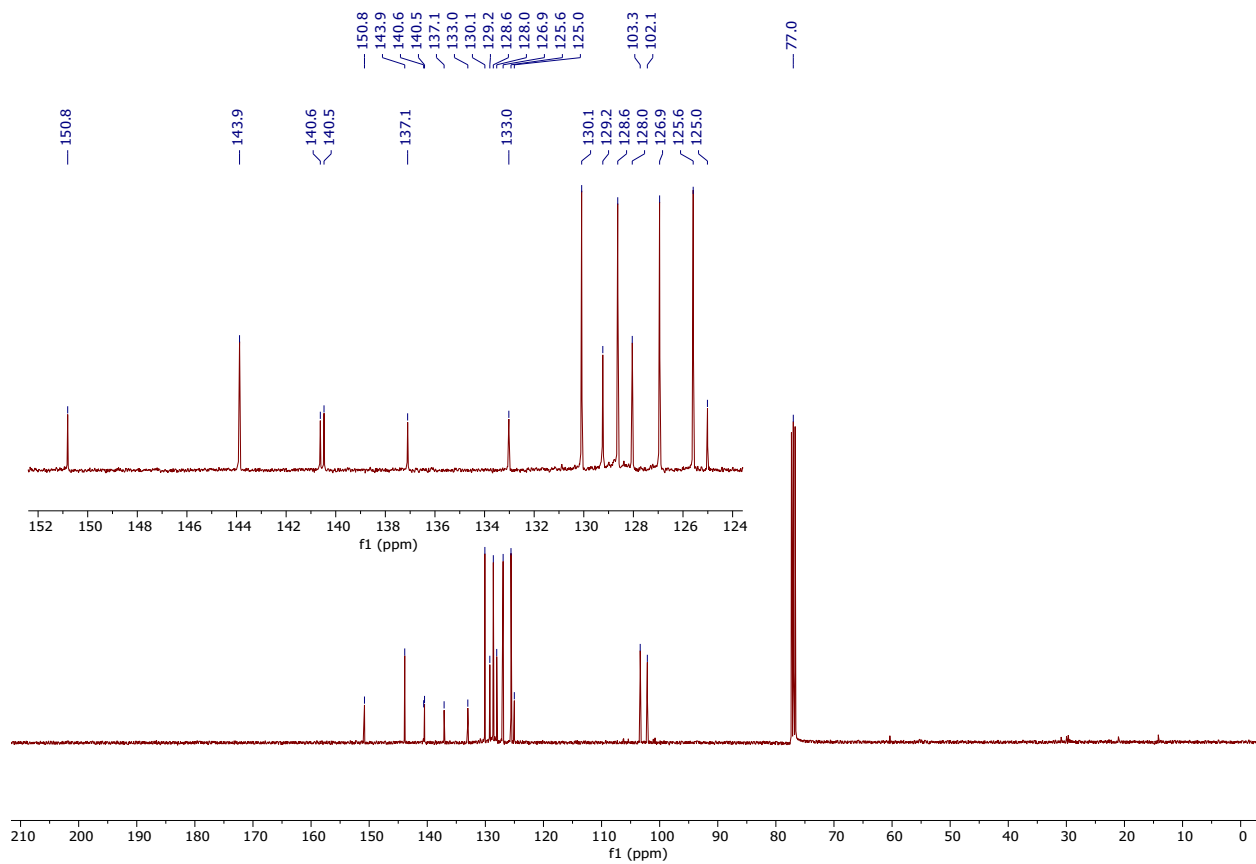

|                               |                                          |                      |                       |
|-------------------------------|------------------------------------------|----------------------|-----------------------|
| <b>Data File</b>              | AC7CIAM.d                                | <b>Sample Name</b>   | AC7CIAM               |
| <b>Sample Type</b>            | Sample                                   | <b>Position</b>      | P1-E3                 |
| <b>Instrument Name</b>        | Instrument 1                             | <b>User Name</b>     |                       |
| <b>Acq Method</b>             | ChB60ChD40_isocratic_esi_positive_3min.m | <b>Acquired Time</b> | 6/24/2019 12:36:25 PM |
| <b>IRM Calibration Status</b> | Success                                  | <b>DA Method</b>     | PROCESSNEW.m          |
| <b>Comment</b>                |                                          |                      |                       |

|                     |      |                               |                                                       |
|---------------------|------|-------------------------------|-------------------------------------------------------|
| <b>Sample Group</b> |      | <b>Info.</b>                  |                                                       |
| <b>Stream Name</b>  | LC 1 | <b>Acquisition SW Version</b> | 6200 series TOF/6500 series Q-TOF B.06.01 (B6172 SP1) |

### Compound Table

| Compound Label        | RT    | Mass     | Abund | Formula       | Tgt Mass | Diff (ppm) |
|-----------------------|-------|----------|-------|---------------|----------|------------|
| Cpd 1: 0.181 404.2063 | 0.181 | 304.0762 | 32457 | C19 H13 Cl N2 | 304.0767 | -1.83      |

| Compound Label        | m/z      | RT    | Algorithm       | Mass     |
|-----------------------|----------|-------|-----------------|----------|
| Cpd 1: 0.181 404.2063 | 305.0835 | 0.181 | Find By Formula | 304.0762 |

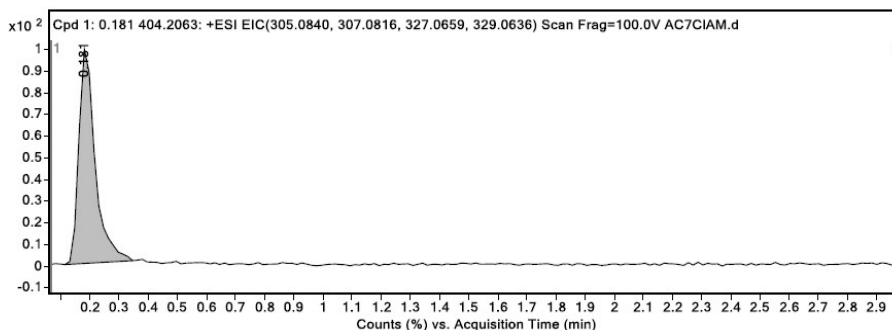

### MS Zoomed Spectrum

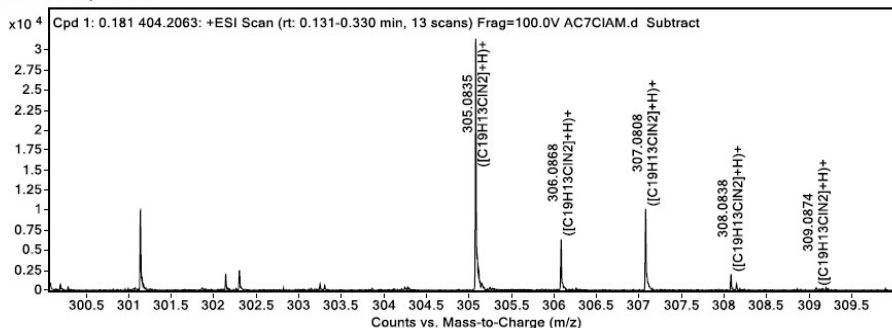

### MS Spectrum Peak List

| m/z      | Calc m/z | Diff(ppm) | z | Abund    | Formula    | Ion    |
|----------|----------|-----------|---|----------|------------|--------|
| 305.0835 | 305.084  | 1.7       | 1 | 32456.55 | C19H13ClN2 | (M+H)+ |
| 306.0868 | 306.0872 | 1.14      | 1 | 6498.44  | C19H13ClN2 | (M+H)+ |
| 307.0808 | 307.0816 | 2.66      | 1 | 10217.14 | C19H13ClN2 | (M+H)+ |
| 308.0838 | 308.0844 | 1.97      | 1 | 2032.82  | C19H13ClN2 | (M+H)+ |
| 309.0874 | 309.0874 | 0.2       | 1 | 298.57   | C19H13ClN2 | (M+H)+ |

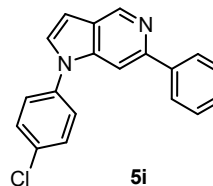

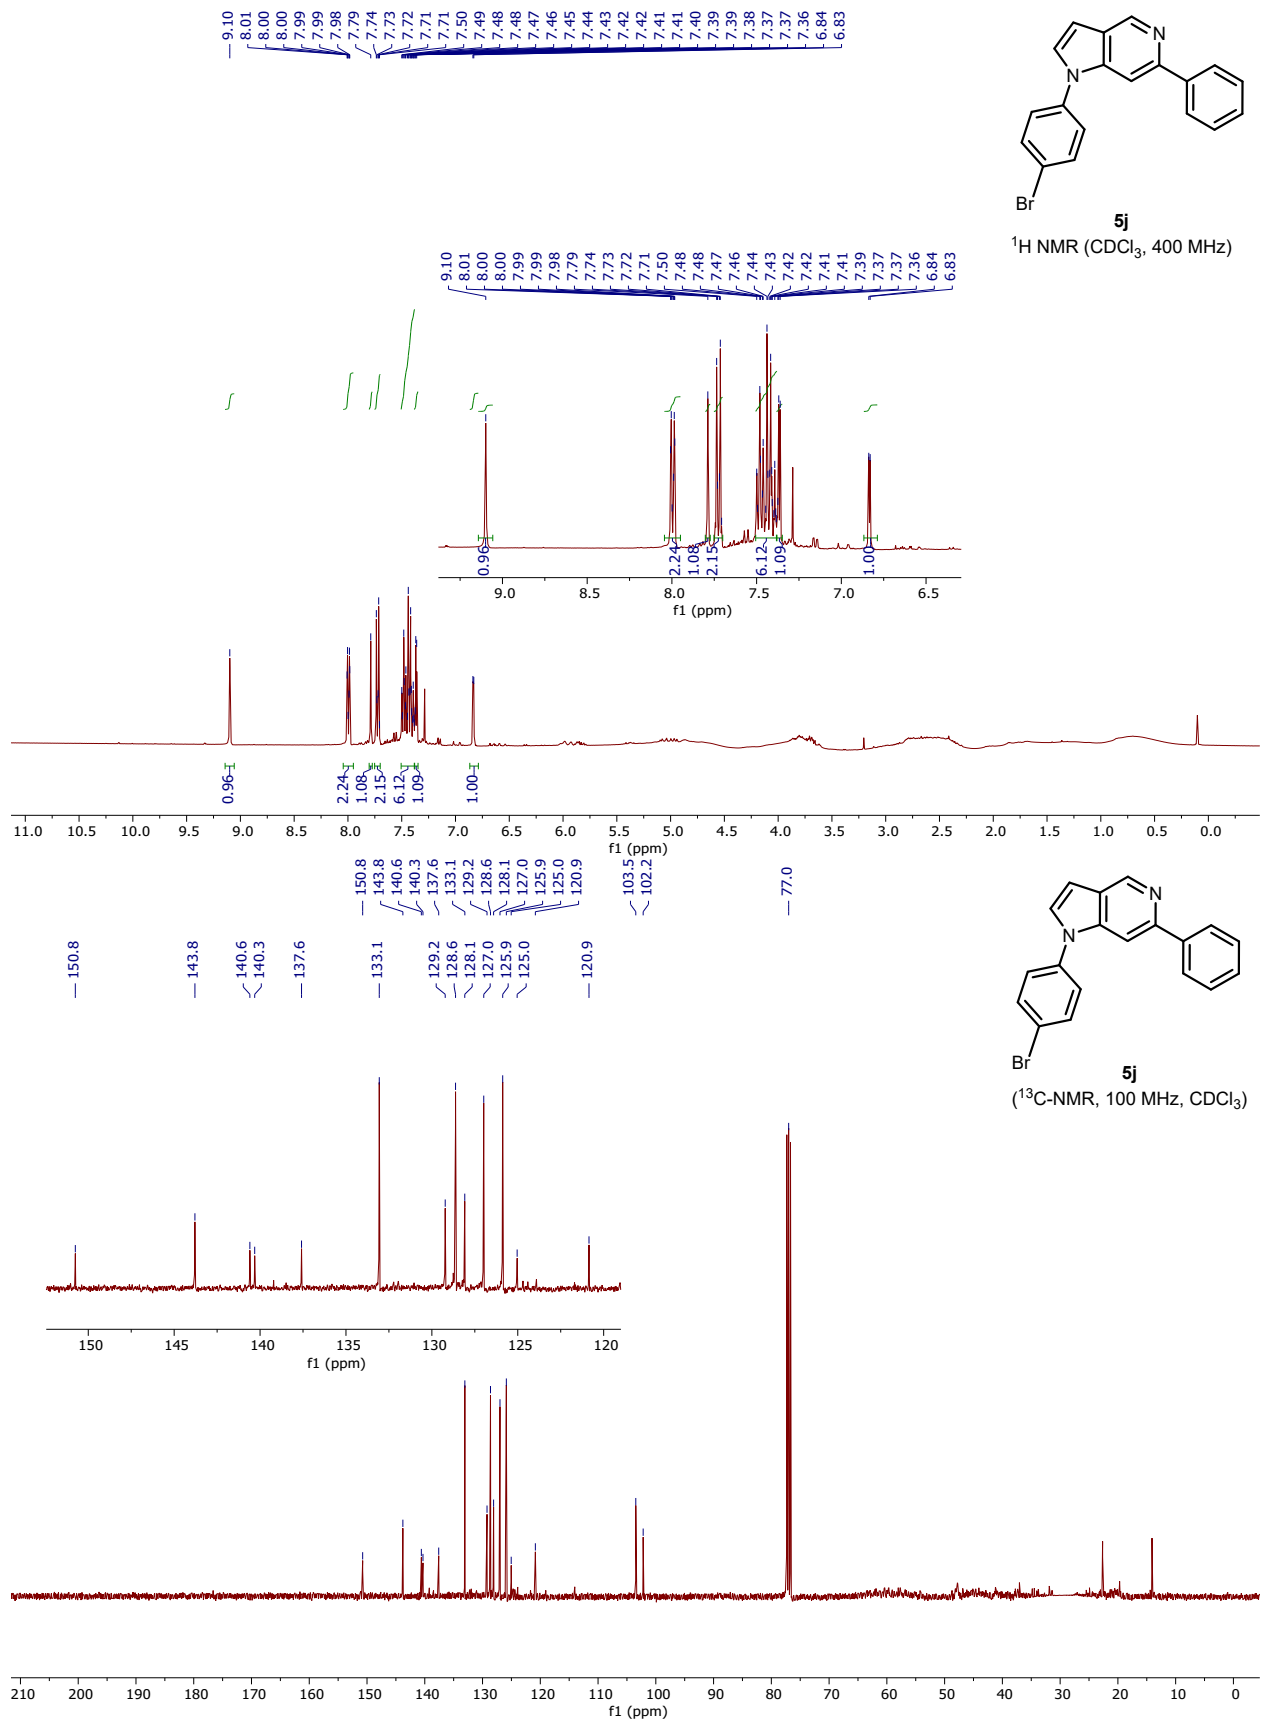





|                               |                                          |                      |                      |
|-------------------------------|------------------------------------------|----------------------|----------------------|
| <b>Data File</b>              | AC4BRAM.d                                | <b>Sample Name</b>   | AC4BRAM              |
| <b>Sample Type</b>            | Sample                                   | <b>Position</b>      | P1-E10               |
| <b>Instrument Name</b>        | Instrument 1                             | <b>User Name</b>     |                      |
| <b>Acq Method</b>             | ChB60ChD40_isocratic_esi_positive_3min.m | <b>Acquired Time</b> | 6/24/2019 1:34:50 PM |
| <b>IRM Calibration Status</b> | Success                                  | <b>DA Method</b>     | PROCESSNEW.m         |
| <b>Comment</b>                |                                          |                      |                      |

|                     |      |                               |                                                       |
|---------------------|------|-------------------------------|-------------------------------------------------------|
| <b>Sample Group</b> |      | <b>Info.</b>                  |                                                       |
| <b>Stream Name</b>  | LC 1 | <b>Acquisition SW Version</b> | 6200 series TOF/6500 series Q-TOF B.06.01 (B6172 SP1) |

### Compound Table

| Compound Label        | RT    | Mass    | Abund | Formula       | Tgt Mass | Diff (ppm) |
|-----------------------|-------|---------|-------|---------------|----------|------------|
| Cpd 1: 0.178 338.3434 | 0.178 | 348.028 | 89197 | C19 H13 Br N2 | 348.0262 | 5.06       |

| Compound Label        | m/z      | RT    | Algorithm       | Mass    |
|-----------------------|----------|-------|-----------------|---------|
| Cpd 1: 0.178 338.3434 | 349.0352 | 0.178 | Find By Formula | 348.028 |

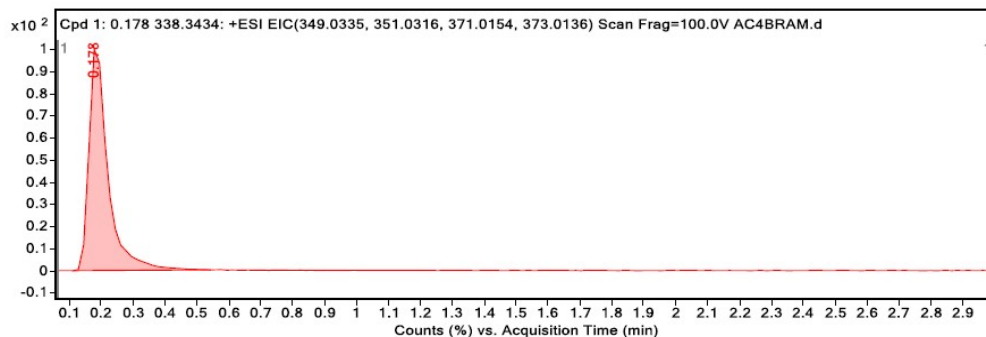

### MS Zoomed Spectrum

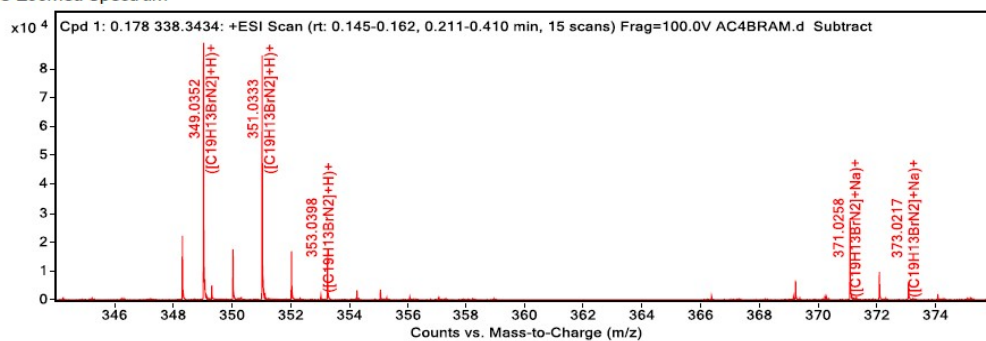

### MS Spectrum Peak List

| m/z      | Calc m/z | Diff(ppm) | z | Abund    | Formula    | Ion     |
|----------|----------|-----------|---|----------|------------|---------|
| 349.0352 | 349.0335 | -5.04     | 1 | 89196.89 | C19H13BrN2 | (M+H)+  |
| 350.0384 | 350.0366 | -4.95     | 1 | 17865.1  | C19H13BrN2 | (M+H)+  |
| 351.0333 | 351.0316 | -4.91     | 1 | 84592.49 | C19H13BrN2 | (M+H)+  |
| 352.0365 | 352.0347 | -5.12     | 1 | 17224    | C19H13BrN2 | (M+H)+  |
| 353.0398 | 353.0378 | -5.6      | 1 | 1702.3   | C19H13BrN2 | (M+H)+  |
| 354.0433 | 354.0409 | -6.87     | 1 | 118.15   | C19H13BrN2 | (M+H)+  |
| 371.0258 | 371.0154 | -27.85    | 1 | 201.65   | C19H13BrN2 | (M+Na)+ |
| 372.0301 | 372.0186 | -30.92    | 1 | 64.59    | C19H13BrN2 | (M+Na)+ |
| 373.0217 | 373.0136 | -21.92    | 1 | 73.54    | C19H13BrN2 | (M+Na)+ |

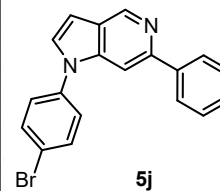

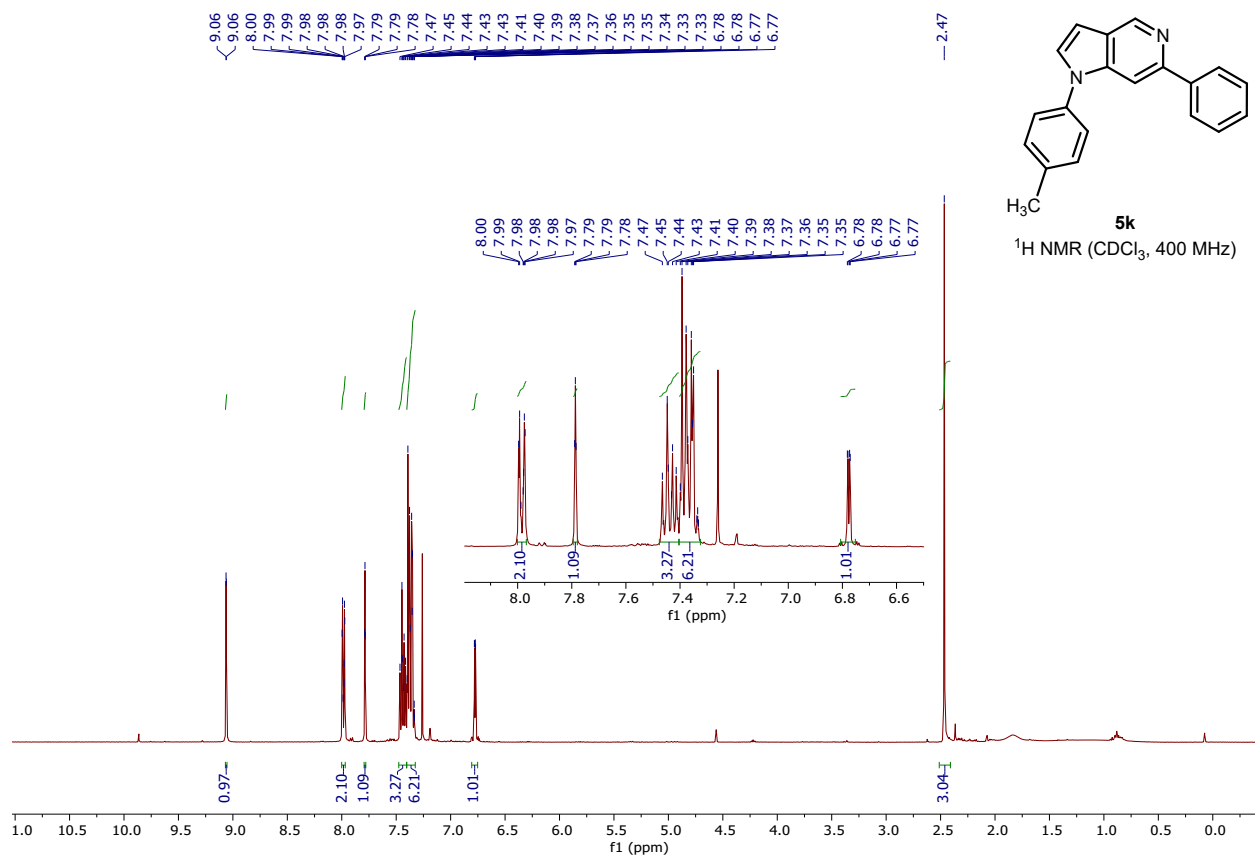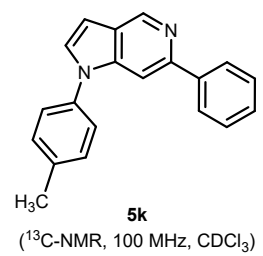

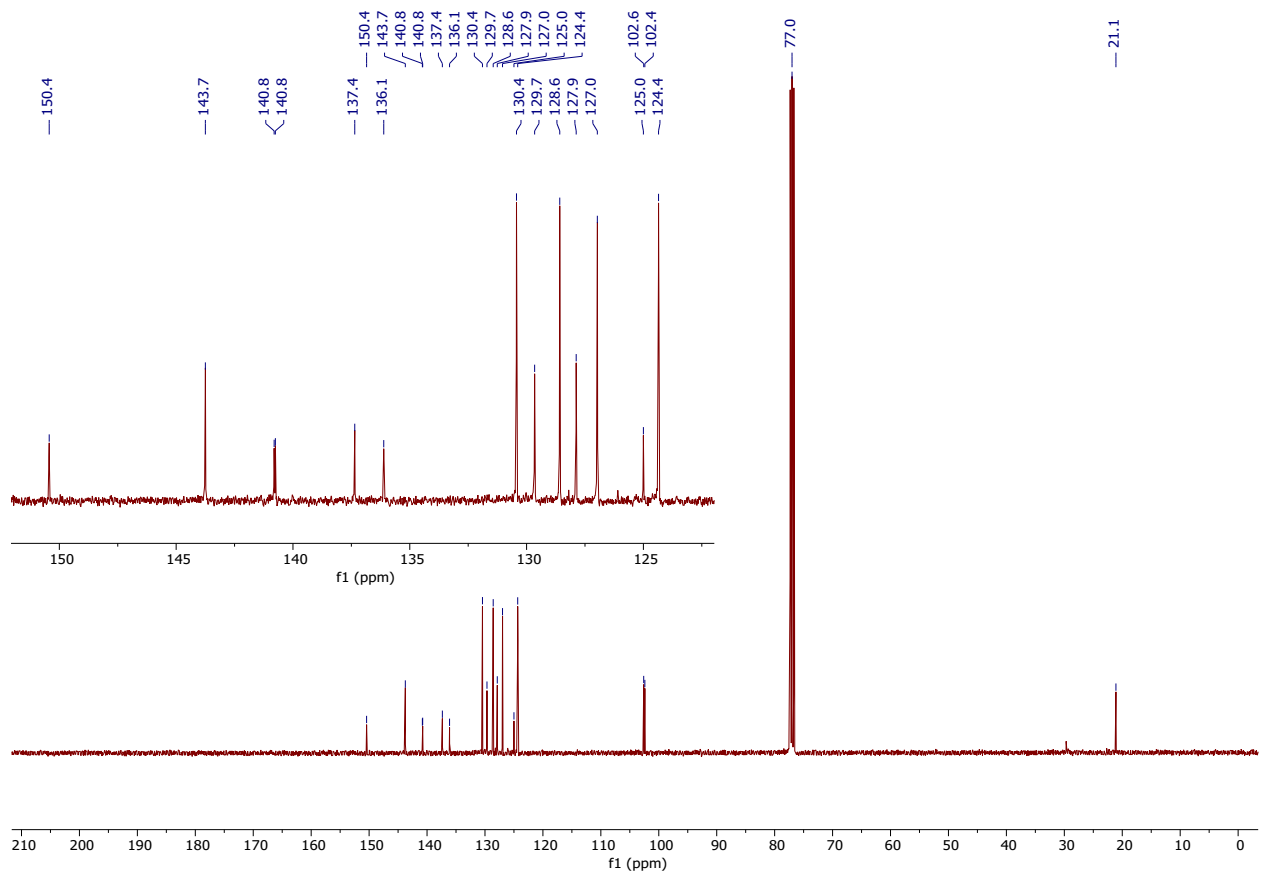

|                               |                                          |                      |                       |
|-------------------------------|------------------------------------------|----------------------|-----------------------|
| <b>Data File</b>              | AC4CH3AM.d                               | <b>Sample Name</b>   | AC4CH3AM              |
| <b>Sample Type</b>            | Sample                                   | <b>Position</b>      | P1-E1                 |
| <b>Instrument Name</b>        | Instrument 1                             | <b>User Name</b>     |                       |
| <b>Acq Method</b>             | ChB60ChD40_isocratic_esi_positive_3min.m | <b>Acquired Time</b> | 6/24/2019 12:19:43 PM |
| <b>IRM Calibration Status</b> | Success                                  | <b>DA Method</b>     | PROCESSNEW.m          |
| <b>Comment</b>                |                                          |                      |                       |

|                     |      |                       |                             |
|---------------------|------|-----------------------|-----------------------------|
| <b>Sample Group</b> |      | <b>Info.</b>          |                             |
| <b>Stream Name</b>  | LC 1 | <b>Acquisition SW</b> | 6200 series TOF/6500 series |
|                     |      | <b>Version</b>        | Q-TOF B.06.01 (B6172 SP1)   |

### Compound Table

| Compound Label        | RT    | Mass     | Abund  | Formula    | Tgt Mass | Diff (ppm) |
|-----------------------|-------|----------|--------|------------|----------|------------|
| Cpd 1: 0.188 285.1382 | 0.188 | 284.1309 | 216885 | C20 H16 N2 | 284.1313 | -1.42      |

| Compound Label        | m/z      | RT    | Algorithm       | Mass     |
|-----------------------|----------|-------|-----------------|----------|
| Cpd 1: 0.188 285.1382 | 285.1382 | 0.188 | Find By Formula | 284.1309 |

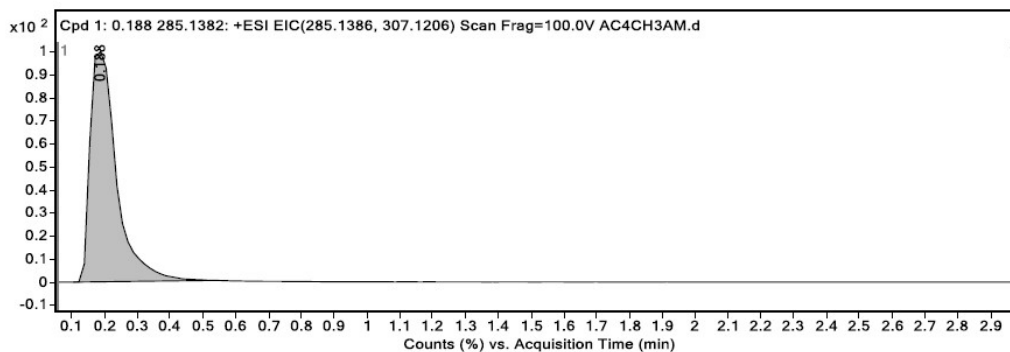

### MS Zoomed Spectrum

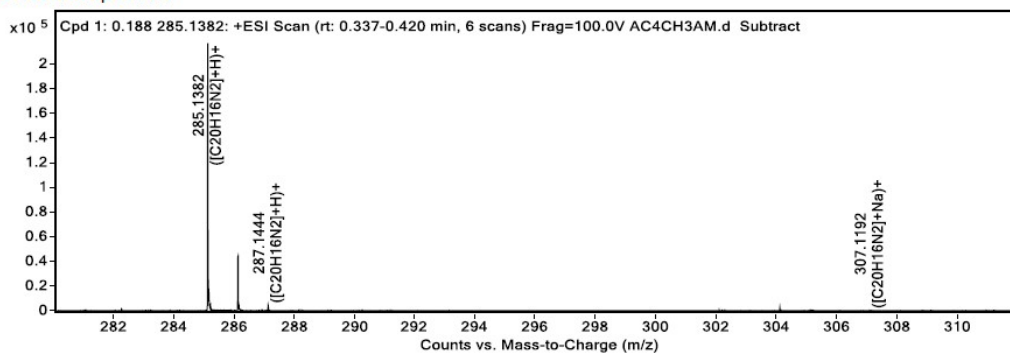

### MS Spectrum Peak List

| m/z      | Calc m/z | Diff(ppm) | z | Abund     | Formula  | Ion     |
|----------|----------|-----------|---|-----------|----------|---------|
| 285.1382 | 285.1386 | 1.51      | 1 | 216885.44 | C20H16N2 | (M+H)+  |
| 286.1415 | 286.1418 | 0.94      | 1 | 45441.02  | C20H16N2 | (M+H)+  |
| 287.1444 | 287.145  | 1.97      | 1 | 4364.42   | C20H16N2 | (M+H)+  |
| 288.1508 | 288.1481 | -9.36     | 1 | 301.94    | C20H16N2 | (M+H)+  |
| 307.1192 | 307.1206 | 4.48      | 1 | 177.97    | C20H16N2 | (M+Na)+ |

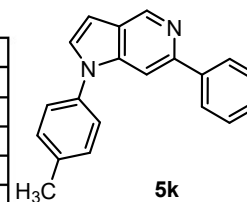

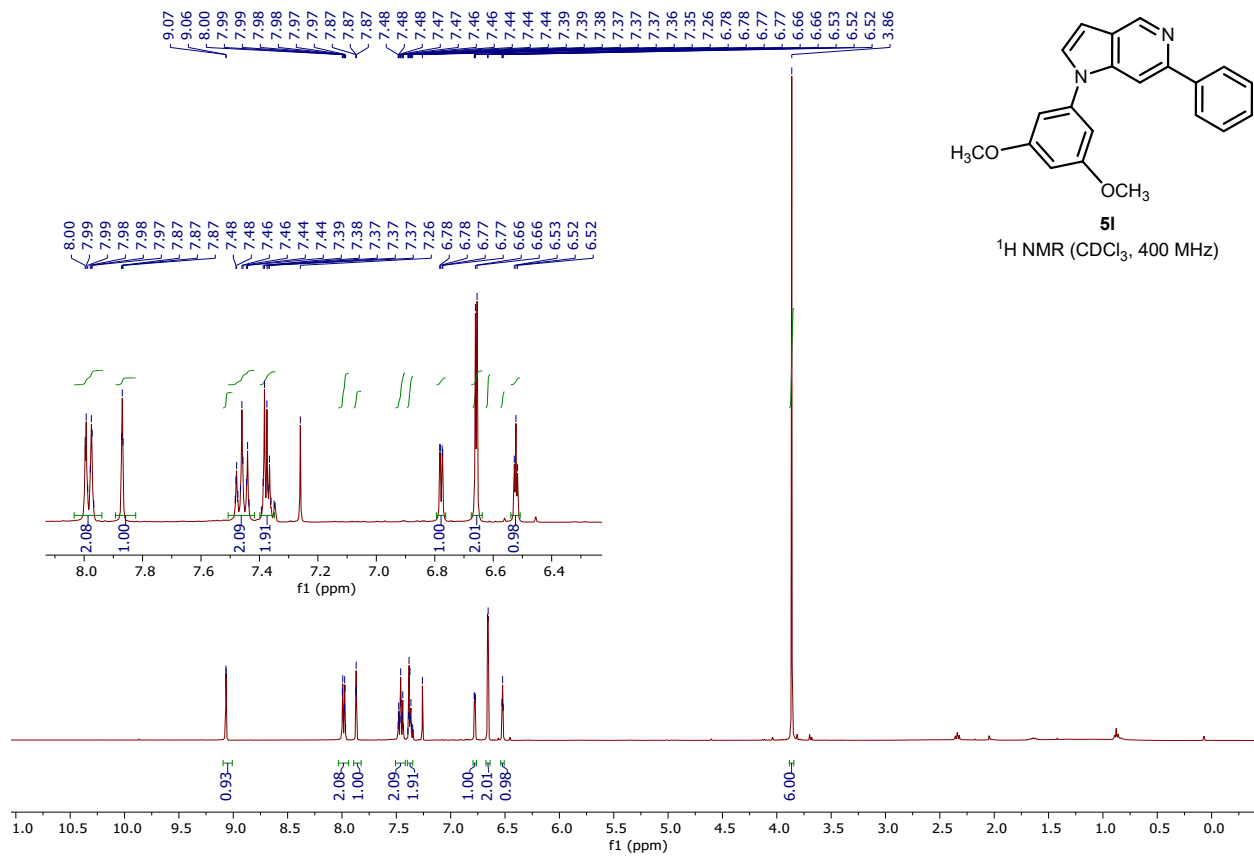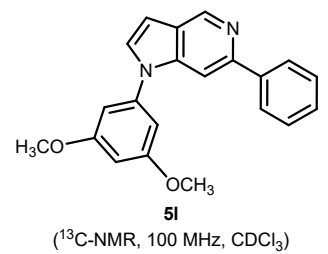

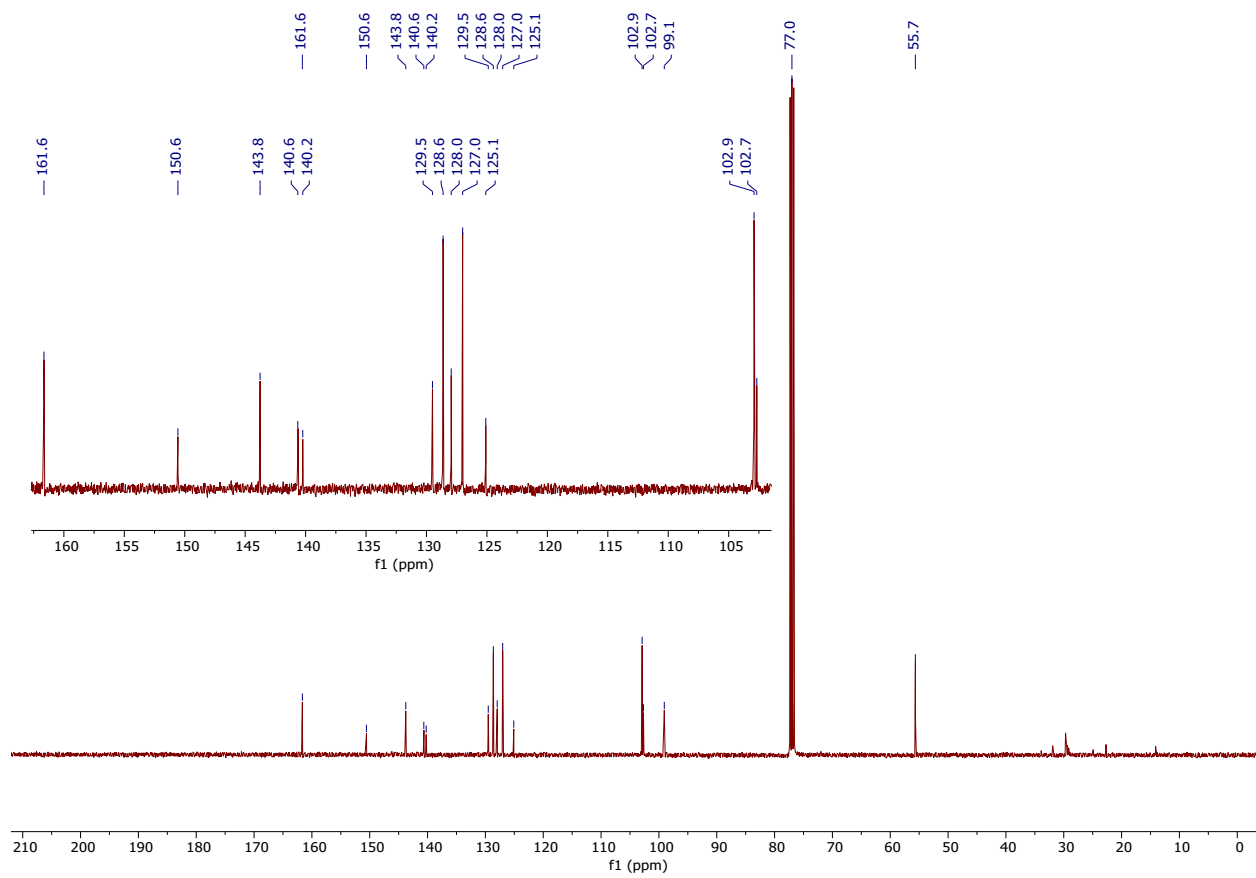

|                        |                                                |               |                      |
|------------------------|------------------------------------------------|---------------|----------------------|
| Data File              | AC2AM.d                                        | Sample Name   | AC2AM                |
| Sample Type            | Sample                                         | Position      | P2-A7                |
| Instrument Name        | Instrument 1                                   | User Name     |                      |
| Acq Method             | ChB60ChD40_isocratic_esi_positive_3min.bintu.m | Acquired Time | 6/21/2019 5:33:54 PM |
| IRM Calibration Status | Success                                        | DA Method     | PROCESSNEW.m         |
| Comment                |                                                |               |                      |

|              |      |                |                             |
|--------------|------|----------------|-----------------------------|
| Sample Group |      | Info.          |                             |
| Stream Name  | LC 1 | Acquisition SW | 6200 series TOF/6500 series |
|              |      | Version        | Q-TOF B.06.01 (B6172 SP1)   |

### Compound Table

| Compound Label       | RT    | Mass     | Abund  | Formula       | Tgt Mass | Diff (ppm) |
|----------------------|-------|----------|--------|---------------|----------|------------|
| Cpd 1: 0.553 59.0452 | 0.553 | 330.1348 | 120877 | C21 H18 N2 O2 | 330.1368 | -6.13      |

| Compound Label       | m/z      | RT    | Algorithm       | Mass     |
|----------------------|----------|-------|-----------------|----------|
| Cpd 1: 0.553 59.0452 | 331.1421 | 0.553 | Find By Formula | 330.1348 |

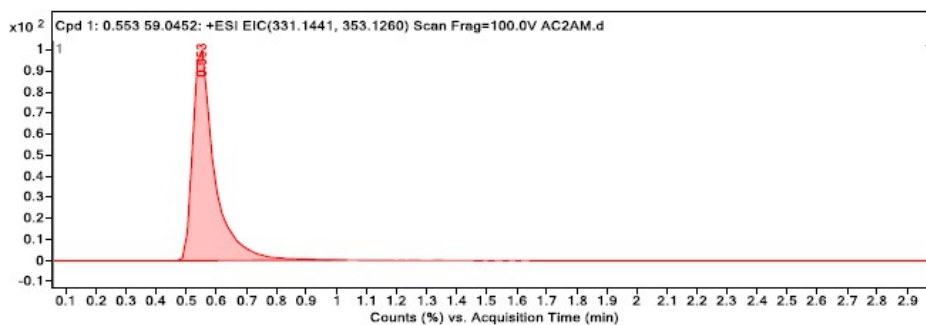

### MS Zoomed Spectrum

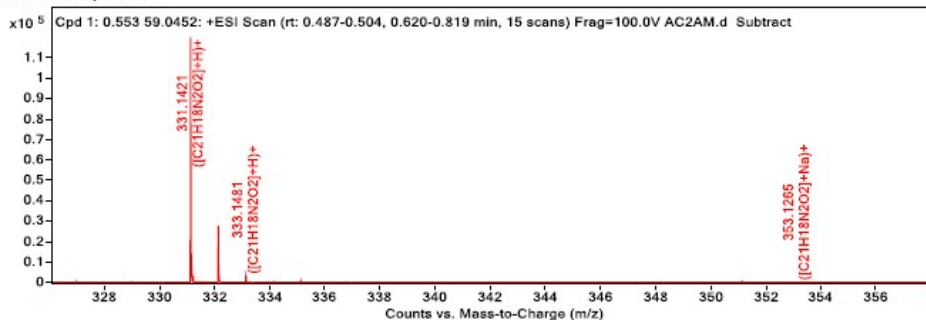

### MS Spectrum Peak List

| m/z      | Calc m/z | Diff(ppm) | z | Abund     | Formula    | Ion     |
|----------|----------|-----------|---|-----------|------------|---------|
| 331.1421 | 331.1441 | 6.17      | 1 | 120876.95 | C21H18N2O2 | (M+H)+  |
| 332.1454 | 332.1473 | 5.82      | 1 | 27796.15  | C21H18N2O2 | (M+H)+  |
| 333.1481 | 333.1502 | 6.16      | 1 | 3211.98   | C21H18N2O2 | (M+H)+  |
| 334.1505 | 334.1529 | 7.16      | 1 | 403.58    | C21H18N2O2 | (M+H)+  |
| 353.1265 | 353.126  | -1.17     | 1 | 79.85     | C21H18N2O2 | (M+Na)+ |

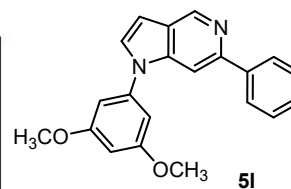



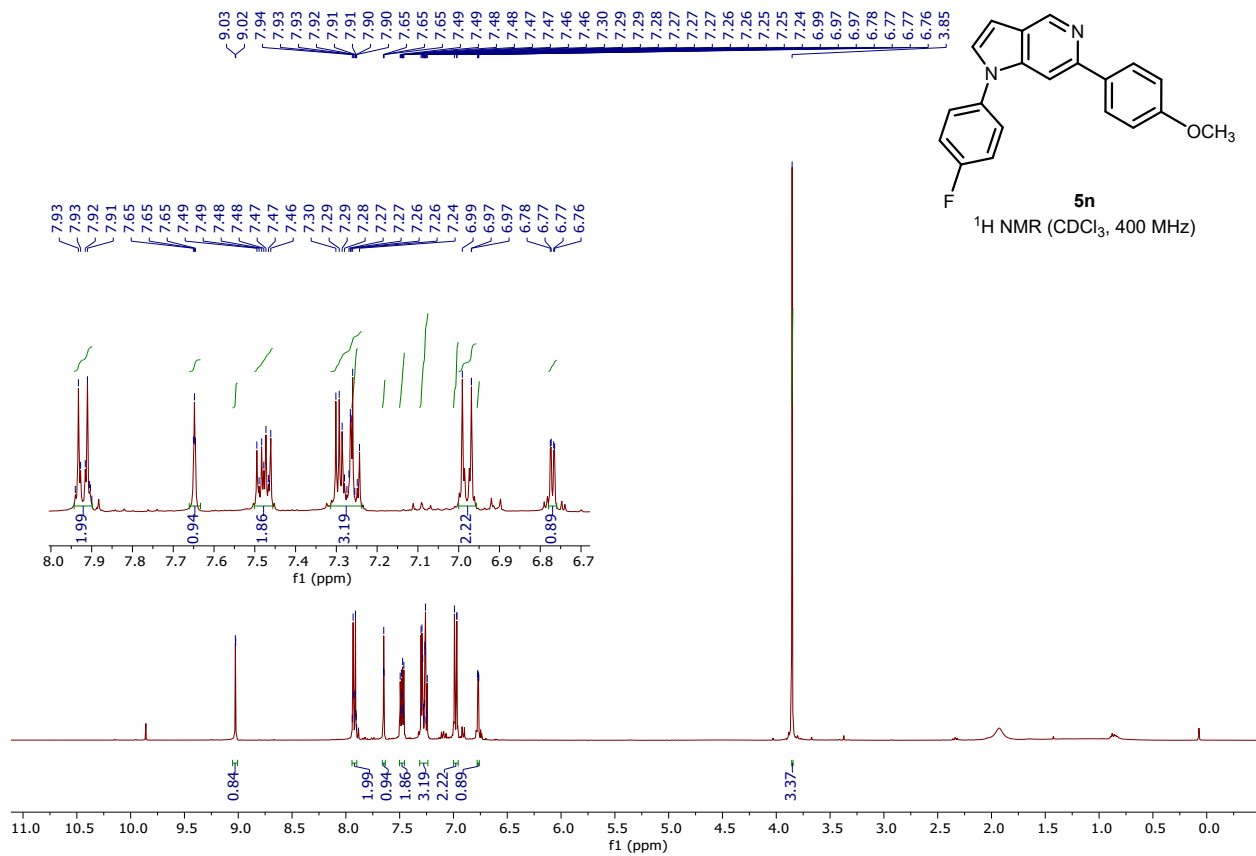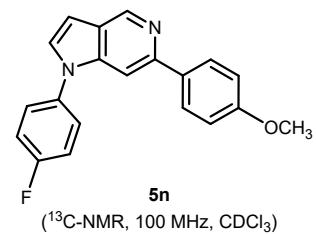

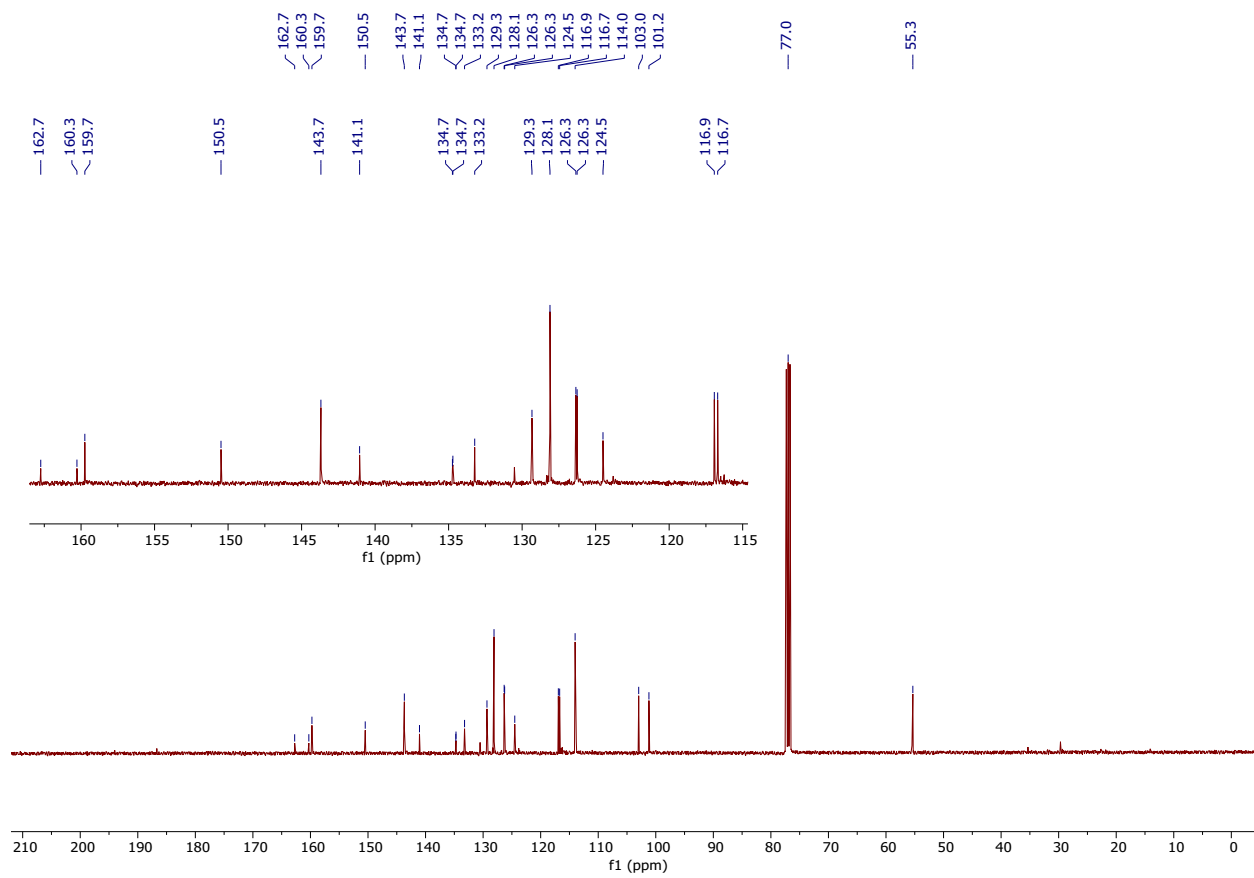

|                               |                                          |                      |                      |
|-------------------------------|------------------------------------------|----------------------|----------------------|
| <b>Data File</b>              | MAC4FAM.d                                | <b>Sample Name</b>   | MAC4FAM              |
| <b>Sample Type</b>            | Sample                                   | <b>Position</b>      | P1-E9                |
| <b>Instrument Name</b>        | Instrument 1                             | <b>User Name</b>     |                      |
| <b>Acq Method</b>             | ChB60ChD40_isocratic_esi_positive_3min.m | <b>Acquired Time</b> | 6/24/2019 1:18:10 PM |
| <b>IRM Calibration Status</b> | Success                                  | <b>DA Method</b>     | PROCESSNEW.m         |
| <b>Comment</b>                |                                          |                      |                      |

|                     |      |                               |                                                          |
|---------------------|------|-------------------------------|----------------------------------------------------------|
| <b>Sample Group</b> |      | <b>Info.</b>                  |                                                          |
| <b>Stream Name</b>  | LC 1 | <b>Acquisition SW Version</b> | 6200 series TOF/6500 series<br>Q-TOF B.06.01 (B6172 SP1) |

#### Compound Table

| Compound Label        | RT    | Mass     | Abund | Formula        | Tgt Mass | Diff (ppm) |
|-----------------------|-------|----------|-------|----------------|----------|------------|
| Cpd 1: 0.192 331.2866 | 0.192 | 318.1191 | 79417 | C20 H15 F N2 O | 318.1168 | 7.1        |

| Compound Label        | m/z      | RT    | Algorithm       | Mass     |
|-----------------------|----------|-------|-----------------|----------|
| Cpd 1: 0.192 331.2866 | 319.1264 | 0.192 | Find By Formula | 318.1191 |

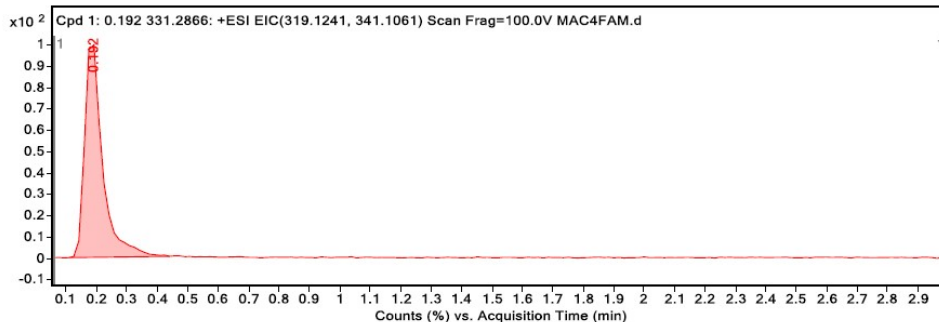

#### MS Zoomed Spectrum

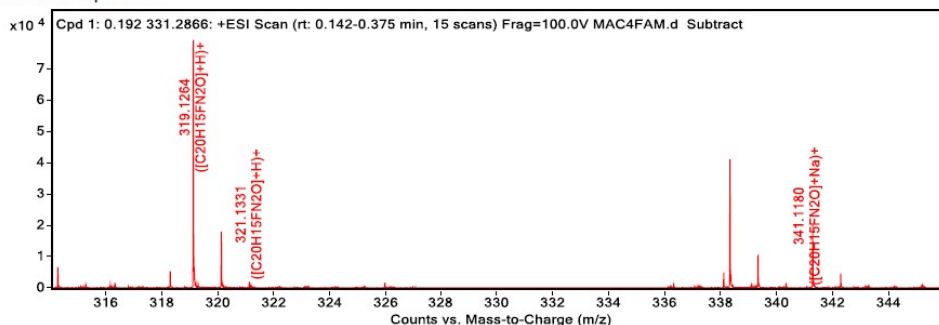

#### MS Spectrum Peak List

| m/z      | Calc m/z | Diff(ppm) | z | Abund    | Formula    | Ion     |
|----------|----------|-----------|---|----------|------------|---------|
| 319.1264 | 319.1241 | -7.07     | 1 | 79417.44 | C20H15FN2O | (M+H)+  |
| 320.1295 | 320.1273 | -6.77     | 1 | 17944.06 | C20H15FN2O | (M+H)+  |
| 321.1331 | 321.1303 | -8.62     | 1 | 1947.11  | C20H15FN2O | (M+H)+  |
| 322.1319 | 322.1332 | 3.77      | 1 | 100.01   | C20H15FN2O | (M+H)+  |
| 341.118  | 341.1061 | -34.89    | 1 | 148.68   | C20H15FN2O | (M+Na)+ |

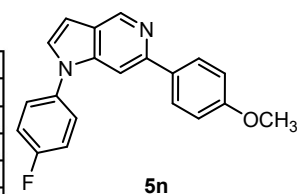

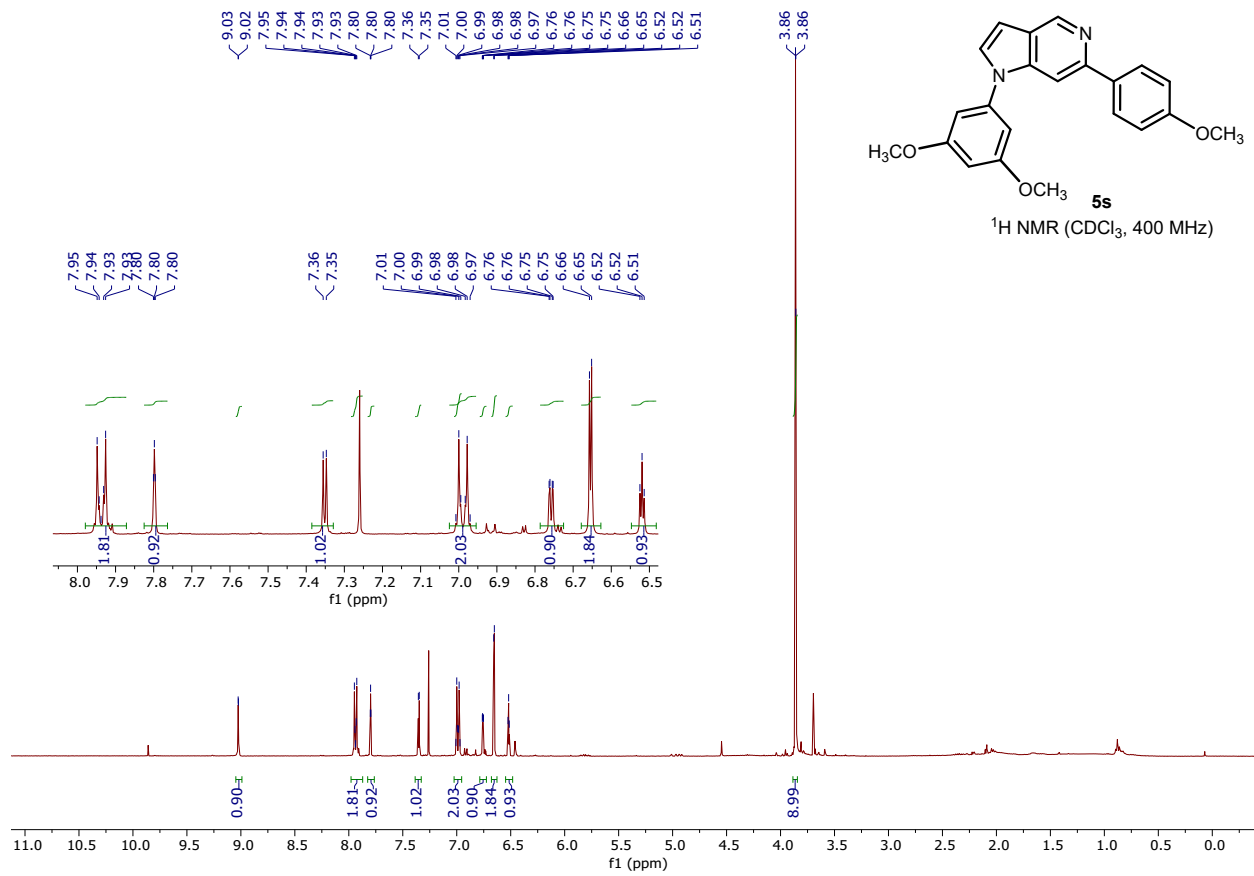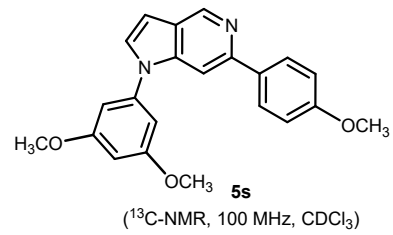

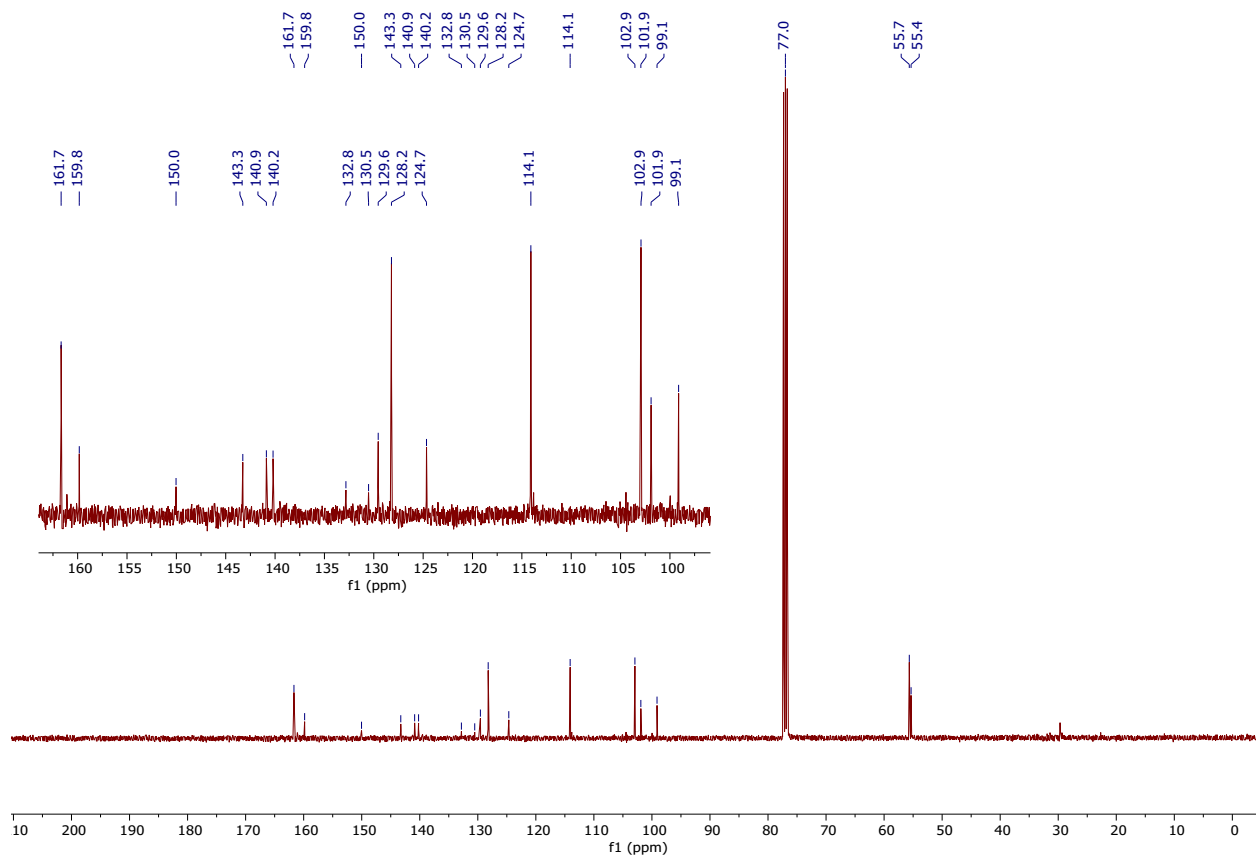

|                               |                                          |                      |                      |
|-------------------------------|------------------------------------------|----------------------|----------------------|
| <b>Data File</b>              | MACDMAM.d                                | <b>Sample Name</b>   | MACDMAM              |
| <b>Sample Type</b>            | Sample                                   | <b>Position</b>      | P1-E6                |
| <b>Instrument Name</b>        | Instrument 1                             | <b>User Name</b>     |                      |
| <b>Acq Method</b>             | ChB60ChD40_isocratic_esi_positive_3min.m | <b>Acquired Time</b> | 6/24/2019 1:26:32 PM |
| <b>IRM Calibration Status</b> | Success                                  | <b>DA Method</b>     | PROCESSNEW.m         |
| <b>Comment</b>                |                                          |                      |                      |

|                     |      |                       |                             |
|---------------------|------|-----------------------|-----------------------------|
| <b>Sample Group</b> |      | <b>Info.</b>          |                             |
| <b>Stream Name</b>  | LC 1 | <b>Acquisition SW</b> | 6200 series TOF/6500 series |
|                     |      | <b>Version</b>        | Q-TOF B.06.01 (B6172 SP1)   |

### Compound Table

| Compound Label        | RT    | Mass     | Abund | Formula       | Tgt Mass | Diff (ppm) |
|-----------------------|-------|----------|-------|---------------|----------|------------|
| Cpd 1: 0.182 361.1568 | 0.182 | 360.1495 | 79262 | C22 H20 N2 O3 | 360.1474 | 5.88       |

| Compound Label        | m/z      | RT    | Algorithm       | Mass     |
|-----------------------|----------|-------|-----------------|----------|
| Cpd 1: 0.182 361.1568 | 361.1568 | 0.182 | Find By Formula | 360.1495 |

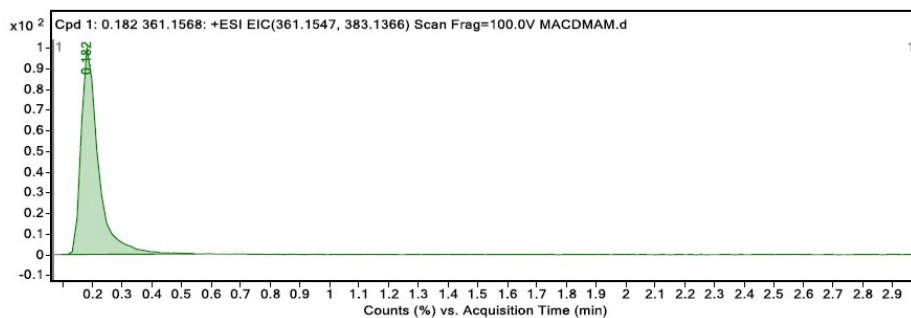

### MS Zoomed Spectrum

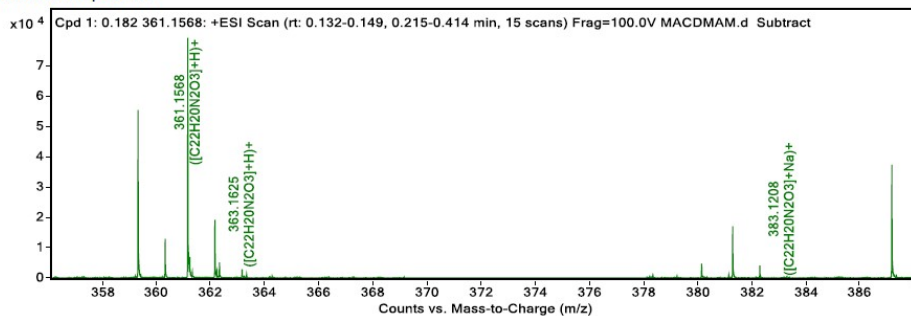

### MS Spectrum Peak List

| m/z      | Calc m/z | Diff(ppm) | z | Abund    | Formula    | Ion     |
|----------|----------|-----------|---|----------|------------|---------|
| 361.1568 | 361.1547 | -5.84     | 1 | 79262.38 | C22H20N2O3 | (M+H)+  |
| 362.1601 | 362.1579 | -6.26     | 1 | 19321.79 | C22H20N2O3 | (M+H)+  |
| 363.1625 | 363.1607 | -4.84     | 1 | 2887.92  | C22H20N2O3 | (M+H)+  |
| 364.1658 | 364.1634 | -6.59     | 1 | 378.85   | C22H20N2O3 | (M+H)+  |
| 383.1208 | 383.1366 | 41.3      | 1 | 70.45    | C22H20N2O3 | (M+Na)+ |

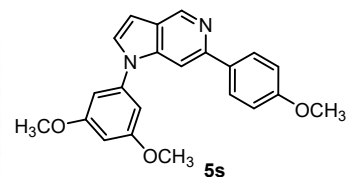

## DFT Computational study of frontier orbitals

### DFT settings:

Program: ORCA 4.2

Functional: B3LYP

Basis set: def2-TZVP

Auxiliary basis set: def2/J

Additional settings to speed up the calculation: RIJCOSX

Dispersion correction: D3BJ

Integration accuracy and grid: IntAccX: 5,5,5; GridX: 3,3,4

### HOMO-LUMO Energies

| Compound | HOMO (eV) | LUMO (eV) | E_gap (eV) |
|----------|-----------|-----------|------------|
| 5a       | -5.5965   | -0.9836   | 4.6129     |
| 5e       | -5.3189   | -0.9119   | 4.407      |
| 5g       | -5.698    | -1.1255   | 4.5725     |
| 5h       | -5.7756   | -1.1795   | 4.5961     |
| 5i       | -5.8044   | -1.3412   | 4.4632     |
| 5j       | -5.7942   | -1.3541   | 4.4401     |
| 5k       | -5.6345   | -1.1351   | 4.4994     |
| 5l       | -5.6841   | -1.1016   | 4.5825     |
| 5n       | -5.4255   | -1.1516   | 4.2739     |
| 5s       | -5.3987   | -1.1702   | 4.2285     |

### Structure and images of HOMO and LUMO orbitals

| Structure | 3D view                                                                             | HOMO                                                                                 | LUMO                                                                                  |
|-----------|-------------------------------------------------------------------------------------|--------------------------------------------------------------------------------------|---------------------------------------------------------------------------------------|
| 5a        | 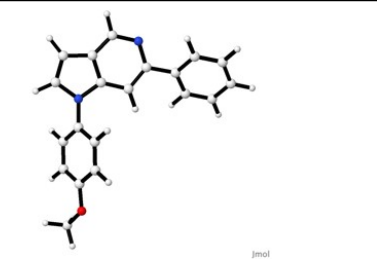 |  |  |

|    |                                                                                     |                                                                                     |                                                                                       |
|----|-------------------------------------------------------------------------------------|-------------------------------------------------------------------------------------|---------------------------------------------------------------------------------------|
| 5e | 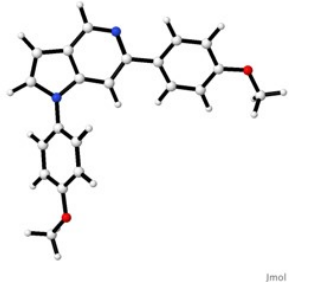   |    |    |
| 5g |    |    |    |
| 5h |   |   |   |
| 5i |  |  |  |
| 5j |  |  |  |
| 5k |  |  |  |
| 5l |  |  |  |



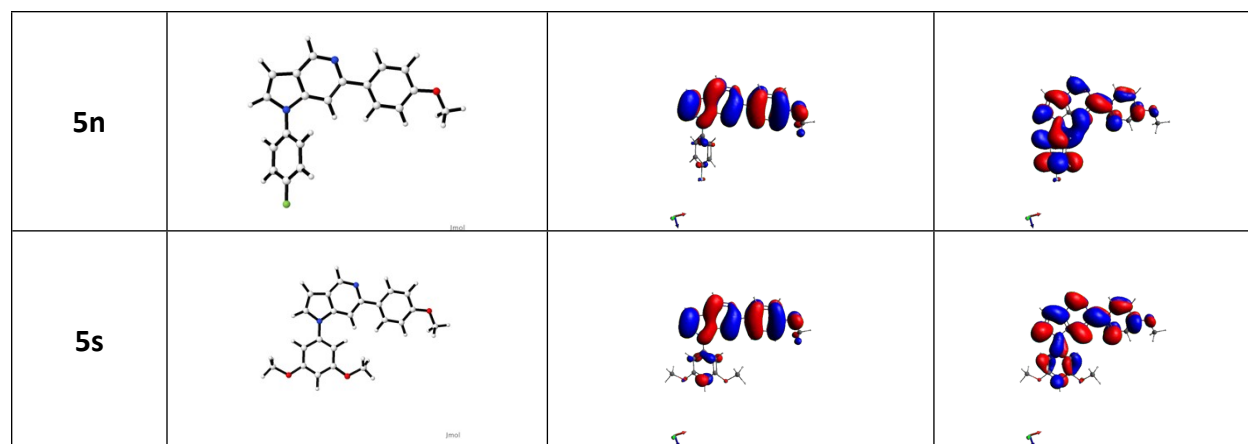

### XYZ coordinates

#### Compound-5a

-----  
**FINAL SINGLE POINT ENERGY -956.342094142865 Eh**  
 -----

|   |                   |                   |                   |
|---|-------------------|-------------------|-------------------|
| H | -1.84133953298016 | 3.53455345505027  | 0.26381365351168  |
| C | -2.67427526539721 | 3.09814269741260  | -0.27032158646731 |
| C | -3.86379225276380 | 2.86098539609940  | 0.42434599832909  |
| C | -4.95582249162972 | 2.31670327473898  | -0.24867698784897 |
| H | -5.88573926971814 | 2.12242174889781  | 0.26426595932919  |
| C | -4.84311848160570 | 1.98821218535706  | -1.59775186062206 |
| H | -5.67952802797279 | 1.53299539141359  | -2.11181766781534 |
| C | -3.65923789681002 | 2.21735437594412  | -2.28498675130066 |
| C | -2.57755385260765 | 2.79106607819429  | -1.61268104415136 |
| H | -1.66366284512989 | 2.99819192289287  | -2.15151043643008 |
| C | -0.45829201000611 | -0.00076663806740 | -4.53462365479298 |
| N | -0.62764399317094 | -0.01203331202100 | -5.87739192784165 |
| C | -1.71212351368462 | 0.53606027119078  | -6.40188543586829 |
| C | -2.69236675768037 | 1.16076708001361  | -5.62459730625454 |
| C | -1.36334187399932 | 0.59607867355966  | -3.66198120135001 |
| C | -2.47922060112983 | 1.19963203816089  | -4.22649193376136 |
| C | -3.93383118147491 | 1.83127856352129  | -5.87802631925287 |
| C | -4.41017127626165 | 2.25197513948293  | -4.67173832354849 |
| H | -1.81360031459375 | 0.48174319737824  | -7.48204903246715 |
| H | -1.17903389359791 | 0.61181460008418  | -2.59855463185379 |
| H | -4.40200044159750 | 1.99545056266134  | -6.83408871702910 |
| H | -5.29553738632372 | 2.81501932032330  | -4.43035545395870 |
| N | -3.53545338630538 | 1.87863999863757  | -3.65582142092621 |
| C | 0.77657778265298  | -0.62183497245916 | -4.00532502873020 |

|   |                   |                   |                   |
|---|-------------------|-------------------|-------------------|
| C | 0.77730465780754  | -1.30148286599214 | -2.78463989464407 |
| H | -0.15308950281088 | -1.43696955730086 | -2.24778960802434 |
| C | 1.95069951455368  | -1.83340789390836 | -2.26772269809612 |
| H | 1.93082037463066  | -2.36382153950832 | -1.32414536758982 |
| C | 3.14617836707476  | -1.68899103672802 | -2.96219303551404 |
| H | 4.06352453198885  | -2.09537500245983 | -2.55489665679716 |
| C | 3.15340917792093  | -1.02722657938728 | -4.18571934637777 |
| H | 4.08060265959543  | -0.91159950126991 | -4.73328974480209 |
| C | 1.97848575351763  | -0.50635944885357 | -4.70857063033451 |
| H | 1.97640122619893  | 0.00384838041148  | -5.66201563233057 |
| O | -3.85105368634082 | 3.19079570989163  | 1.74196809691442  |
| C | -5.01466370837973 | 2.95918532772369  | 2.51755356391801  |
| H | -5.85980080469588 | 3.55042557971529  | 2.15226972615561  |
| H | -5.29025668815947 | 1.90004303234413  | 2.52218916571205  |
| H | -4.76239310911348 | 3.27139434685482  | 3.52807317291172  |

### Compound-5e

-----  
**FINAL SINGLE POINT ENERGY -1070.860004685996 Eh**  
 -----

|   |                   |                   |                   |
|---|-------------------|-------------------|-------------------|
| H | -1.72666773962377 | 3.41657526439265  | 0.25907585891902  |
| C | -2.57948141233272 | 3.00231659957403  | -0.26126426736671 |
| C | -3.74797452492281 | 2.75293882401368  | 0.46368735022328  |
| C | -4.86388568304139 | 2.23606443631717  | -0.19076416565372 |
| H | -5.77799446880245 | 2.02998081557358  | 0.34561353490499  |
| C | -4.79680688104040 | 1.95218226539688  | -1.55287169545844 |
| H | -5.65290063998094 | 1.51946464305334  | -2.05357416766227 |
| C | -3.63560849118551 | 2.19898570650913  | -2.27277440346492 |
| C | -2.52809168513491 | 2.74064314909679  | -1.61619876278458 |
| H | -1.63140062086125 | 2.96391312331543  | -2.17687630309154 |
| C | -0.53018559717947 | 0.09444460077074  | -4.77980533554369 |
| N | -0.79416516698529 | 0.10942502724951  | -6.10864612588444 |
| C | -1.91252677383910 | 0.66253711394350  | -6.54773783669214 |
| C | -2.84772481348491 | 1.25539029715347  | -5.69467366221325 |
| C | -1.38418931852848 | 0.66676039046315  | -3.83901428935552 |
| C | -2.54340504054429 | 1.26469735860900  | -4.31290681638286 |
| C | -4.11000463090210 | 1.91606643220688  | -5.85323827463701 |
| C | -4.51266007669390 | 2.30147833881492  | -4.60924484393640 |
| H | -2.08223038987696 | 0.63793820071225  | -7.62058280898518 |
| H | -1.13278399416115 | 0.66948355585859  | -2.78985258392263 |
| H | -4.63884543129253 | 2.09767674540218  | -6.77373240095461 |
| H | -5.38676255931551 | 2.84741036747344  | -4.29783528037578 |
| N | -3.56940459472212 | 1.91743712495608  | -3.65954973383448 |
| C | 0.74351322739070  | -0.52402592013242 | -4.35319502089986 |

|   |                   |                   |                   |
|---|-------------------|-------------------|-------------------|
| C | 0.90383066817274  | -1.06556097371414 | -3.07911758888129 |
| H | 0.06005629642839  | -1.11334945495002 | -2.40325730839870 |
| C | 2.11997590278751  | -1.58327293110876 | -2.65037604830590 |
| H | 2.19487747331286  | -1.99696253738044 | -1.65587053999793 |
| C | 3.21743175418274  | -1.57008380621512 | -3.50807156132746 |
| C | 3.06822102058539  | -1.05547831029815 | -4.79848111966699 |
| H | 3.92598753154609  | -1.05556903977014 | -5.45850126968142 |
| C | 1.85162291739190  | -0.54621294850094 | -5.21053179228110 |
| H | 1.73991169746013  | -0.14326454870292 | -6.20758257936165 |
| O | -3.69290971794088 | 3.04600619555453  | 1.78923468634916  |
| C | -4.83612181901346 | 2.81121962572164  | 2.59309007707544  |
| H | -5.68505818319263 | 3.41793453405050  | 2.26393166961659  |
| H | -5.12334063557155 | 1.75508121724617  | 2.58576709871283  |
| H | -4.55145462713977 | 3.10098659977611  | 3.60180747478154  |
| C | 4.65500173345040  | -2.52540598577114 | -1.86386724533048 |
| H | 5.69268647992528  | -2.84774070598265 | -1.81335613262337 |
| H | 4.48216133568762  | -1.73777103970746 | -1.12384299378961 |
| H | 4.00328809450474  | -3.37588377435117 | -1.64337120282586 |
| O | 4.45292938448383  | -2.04250657661998 | -3.18224158901083 |

### Compound-5g

-----  
**FINAL SINGLE POINT ENERGY -841.825637059253 Eh**  
 -----

|   |                   |                   |                   |
|---|-------------------|-------------------|-------------------|
| H | -1.69825699245798 | 3.38025120330746  | 0.45510695441316  |
| C | -2.55602649774231 | 2.98032279753769  | -0.06988231039646 |
| C | -3.75498658431732 | 2.77755219400936  | 0.60503695128719  |
| H | -3.83356694110776 | 3.01338400775754  | 1.65822998597653  |
| C | -4.85456962373030 | 2.27599376844467  | -0.08141664465393 |
| H | -5.78955487486792 | 2.11005395750380  | 0.43789131889889  |
| C | -4.75627245368248 | 1.96472684382356  | -1.43143047197615 |
| H | -5.60001062298840 | 1.54544584163666  | -1.96291895649819 |
| C | -3.55366994649676 | 2.17004540002076  | -2.10477723207116 |
| C | -2.45372309120735 | 2.68848268310531  | -1.42323425063595 |
| H | -1.53341175764889 | 2.87645441577457  | -1.95789623700150 |
| C | -0.42496830099291 | -0.01253780120536 | -4.53036253964226 |
| N | -0.67112710873137 | -0.02423810171150 | -5.86120209276496 |
| C | -1.77926023508384 | 0.52954421937795  | -6.32437279747082 |
| C | -2.71272560736756 | 1.15512568482295  | -5.49335391288632 |
| C | -1.27891417623016 | 0.58851312053513  | -3.60883809922921 |
| C | -2.42349771595035 | 1.19405421766484  | -4.10903185639614 |
| C | -3.96901096937856 | 1.81902117837916  | -5.68206666891373 |
| C | -4.38625559057188 | 2.23170888440003  | -4.45293050421488 |
| H | -1.94200667402385 | 0.47686934217557  | -7.39707242354028 |

|   |                   |                   |                   |
|---|-------------------|-------------------|-------------------|
| H | -1.03588720699740 | 0.60252520070358  | -2.55758817623368 |
| H | -4.48420270332833 | 1.98443038252790  | -6.61322221876145 |
| H | -5.26126896472065 | 2.78875050457551  | -4.16533771791386 |
| N | -3.45520545666903 | 1.86643910744838  | -3.48311700586502 |
| C | 0.83791936833520  | -0.63572400801200 | -4.07507861581081 |
| C | 0.93531682314210  | -1.24952124935412 | -2.82332154736769 |
| H | 0.05514857624939  | -1.34036942905728 | -2.19984968553197 |
| C | 2.14102890310984  | -1.77489178282017 | -2.38076130629456 |
| H | 2.19525341925135  | -2.25010769608306 | -1.40952904199566 |
| C | 3.27418831072610  | -1.69725841771628 | -3.18184681702168 |
| H | 4.21597617403134  | -2.10044312600189 | -2.83141104243582 |
| C | 3.18316992448386  | -1.10883128992969 | -4.43871446596110 |
| H | 4.05856869222849  | -1.04872733029500 | -5.07345975209024 |
| C | 1.97655685472440  | -0.58815848483643 | -4.88374081402747 |
| H | 1.89925305001151  | -0.13012623850970 | -5.86011000497223 |

### Compound-5h

-----  
**FINAL SINGLE POINT ENERGY -941.075265664758 Eh**  
 -----

|   |                   |                   |                   |
|---|-------------------|-------------------|-------------------|
| H | -1.70927784575081 | 3.44888433038818  | 0.42616193929109  |
| C | -2.54892072888388 | 3.02396211694963  | -0.10594634707816 |
| C | -3.74341325876961 | 2.80461528612899  | 0.55783559451800  |
| F | -3.83040030799592 | 3.12013801412020  | 1.86660974783472  |
| C | -4.84983636736684 | 2.27215218458995  | -0.07962579915249 |
| H | -5.76233181929177 | 2.10545557615274  | 0.47575353818094  |
| C | -4.75066210396596 | 1.93852566951932  | -1.42438350558847 |
| H | -5.59289512100005 | 1.49321218043186  | -1.93634627389601 |
| C | -3.56096410696044 | 2.15583249454898  | -2.11667341028541 |
| C | -2.46474630298474 | 2.70736721508255  | -1.45458446467120 |
| H | -1.55222608087761 | 2.90118888338651  | -1.99992332102672 |
| C | -0.42147224897756 | -0.01435952914003 | -4.53425221719216 |
| N | -0.65847283070119 | -0.01611509507308 | -5.86674847109674 |
| C | -1.76894811608422 | 0.53063053187158  | -6.33266554389783 |
| C | -2.71408338731814 | 1.13952524338891  | -5.50227707479491 |
| C | -1.28623782289371 | 0.57141416427843  | -3.61301183009493 |
| C | -2.43285117935682 | 1.17082301077866  | -4.11622222761495 |
| C | -3.97323801433690 | 1.79733332453822  | -5.69364819810830 |
| C | -4.39810004659638 | 2.20290196170012  | -4.46477527451964 |
| H | -1.92323217174738 | 0.48702535850760  | -7.40700323670439 |
| H | -1.04908193920087 | 0.57876178891550  | -2.56005771300150 |
| H | -4.48542872193233 | 1.96320290874307  | -6.62639159158978 |
| H | -5.27712810742569 | 2.75460660013526  | -4.17880915032282 |
| N | -3.47061507868273 | 1.83493331018729  | -3.49187012951257 |

|   |                  |                   |                   |
|---|------------------|-------------------|-------------------|
| C | 0.84212866041725 | -0.63351155762459 | -4.07586818813397 |
| C | 0.92452574567160 | -1.28650820609157 | -2.84312907758402 |
| H | 0.03416633741831 | -1.40606325198947 | -2.23910018030155 |
| C | 2.12781038595932 | -1.81598845598675 | -2.39812522490857 |
| H | 2.17057530358676 | -2.32456628378538 | -1.44344887338338 |
| C | 3.27302394739252 | -1.69900315360981 | -3.17707024596594 |
| H | 4.21313842083315 | -2.10442490528737 | -2.82470429331256 |
| C | 3.19792133547130 | -1.06700385756348 | -4.41386988063897 |
| H | 4.08411774966714 | -0.97450792680151 | -5.02940772801639 |
| C | 1.99335496510550 | -0.54532842558149 | -4.86295964266904 |
| H | 1.92779085757871 | -0.05636150580907 | -5.82508170476134 |

### Compound-5i

-----  
**FINAL SINGLE POINT ENERGY -1301.391295272537 Eh**  
 -----

|    |                   |                   |                   |
|----|-------------------|-------------------|-------------------|
| H  | -2.06766452225201 | 2.73635072572289  | 0.88523526267165  |
| C  | -2.86221706536994 | 2.52125764115939  | 0.18459792786077  |
| C  | -4.17046922756865 | 2.39913014803874  | 0.63452318417801  |
| Cl | -4.53635987350508 | 2.59295625331053  | 2.32907760979887  |
| C  | -5.19825553698951 | 2.12693168424962  | -0.25808674589983 |
| H  | -6.21201030040437 | 2.02067686908848  | 0.10091695428531  |
| C  | -4.91237691272111 | 1.97178406688488  | -1.60473548185336 |
| H  | -5.70756364472684 | 1.72450202523614  | -2.29408927832957 |
| C  | -3.60607665833983 | 2.10937632382726  | -2.07491084517673 |
| C  | -2.58427586304743 | 2.39232105143715  | -1.16990285436346 |
| H  | -1.57420640030757 | 2.53602780258252  | -1.52521333114088 |
| C  | -0.30738085506778 | 0.11753971074732  | -4.52744891738325 |
| N  | -0.54422912461090 | 0.14440767291683  | -5.85939708038168 |
| C  | -1.62429513083134 | 0.75140173884220  | -6.31773654179090 |
| C  | -2.54104917457854 | 1.38560624518459  | -5.47811478839229 |
| C  | -1.18217215537764 | 0.66996821820001  | -3.59131412747959 |
| C  | -2.30207738002994 | 1.33221966489949  | -4.08349611555612 |
| C  | -3.76588228116720 | 2.09978914132460  | -5.67889553849805 |
| C  | -4.22720138236046 | 2.44302032112896  | -4.44722842331432 |
| H  | -1.77797816889051 | 0.73814931479236  | -7.39300327203572 |
| H  | -0.99551630340533 | 0.55815906891378  | -2.53445697035262 |
| H  | -4.23001452032397 | 2.34280190673860  | -6.61987664239807 |
| H  | -5.09751478516619 | 3.01006471660168  | -4.16689115648165 |
| N  | -3.35435600847188 | 1.98563343191079  | -3.45853733341327 |
| C  | 0.95325403685801  | -0.53402924248283 | -4.10480689384460 |
| C  | 1.62605622407815  | -0.13584652113626 | -2.94564112573279 |
| H  | 1.23647789711404  | 0.67948539071334  | -2.34997339233306 |
| C  | 2.81767113617916  | -0.74366056070138 | -2.57221186431131 |

|   |                  |                   |                   |
|---|------------------|-------------------|-------------------|
| H | 3.33403432781355 | -0.40818890492079 | -1.68156539979229 |
| C | 3.35573436723439 | -1.76522734143715 | -3.34643083221102 |
| H | 4.28453052938485 | -2.23771250751507 | -3.05275307860958 |
| C | 2.70025580917980 | -2.16264701581289 | -4.50782938182807 |
| H | 3.11819351894635 | -2.94917319903032 | -5.12374815465760 |
| C | 1.51331136907873 | -1.55050873845197 | -4.88484216653461 |
| H | 1.00560405964723 | -1.84383710296368 | -5.79278320469774 |

### Compound-5j

-----  
**FINAL SINGLE POINT ENERGY -3415.272314522263 Eh**  
 -----

|   |                   |                   |                   |
|---|-------------------|-------------------|-------------------|
| H | -1.82330750089460 | 3.02766744475728  | 0.65983429693481  |
| C | -2.66274037955122 | 2.73758587493110  | 0.04412288887146  |
| C | -3.92826851002322 | 2.60606335167408  | 0.60010819693577  |
| C | -5.01344452090269 | 2.24799792092050  | -0.18757546632652 |
| H | -5.99498418293314 | 2.14198496029073  | 0.25148417464191  |
| C | -4.82501232605363 | 2.00247914408592  | -1.53927960123133 |
| H | -5.66106744576900 | 1.68861864259482  | -2.14903164869106 |
| C | -3.56133277131963 | 2.13432354363404  | -2.11351603513135 |
| C | -2.48384715537647 | 2.51468248181287  | -1.31486135007255 |
| H | -1.50866179105881 | 2.65859349278655  | -1.75768776766964 |
| C | -0.40321332216478 | -0.05269370237234 | -4.54730395179379 |
| N | -0.65805989191087 | -0.06161625879477 | -5.87635368991860 |
| C | -1.74917746067359 | 0.52368231520043  | -6.33761089810136 |
| C | -2.65797173191629 | 1.18134794488299  | -5.50556790482389 |
| C | -1.24813764209597 | 0.56004259469012  | -3.62236166758310 |
| C | -2.37720712683625 | 1.19882869184988  | -4.11878474538427 |
| C | -3.88628027083561 | 1.89192426465087  | -5.70244390426427 |
| C | -4.30307226360095 | 2.30708031682382  | -4.47597877878454 |
| H | -1.91758874118982 | 0.47278379743626  | -7.40952810263445 |
| H | -1.00752227972748 | 0.55858644885527  | -2.57109380751233 |
| H | -4.38101728357565 | 2.08731691832769  | -6.63889026797104 |
| H | -5.16002537881979 | 2.89485730335543  | -4.19643671150896 |
| N | -3.39683559612762 | 1.90001421079079  | -3.49592861440883 |
| C | 0.86858900925826  | -0.67594306215716 | -4.11388840169743 |
| C | 1.04863763760259  | -1.16286519873102 | -2.81554743849551 |
| H | 0.21853610422462  | -1.17392188141141 | -2.12144570998084 |
| C | 2.27708832744998  | -1.66195980670966 | -2.40668247845760 |
| H | 2.39619701684558  | -2.03373610358294 | -1.39682694377714 |
| C | 3.34978850982187  | -1.69307471622909 | -3.28989334149372 |
| H | 4.30891777049029  | -2.07752883933979 | -2.96694336608944 |
| C | 3.17373023977135  | -1.24119149254094 | -4.59345605923409 |
| H | 3.99989684039026  | -1.27036398821579 | -5.29295379329788 |

|    |                   |                   |                   |
|----|-------------------|-------------------|-------------------|
| C  | 1.94626698996392  | -0.74059722439851 | -5.00227155961074 |
| H  | 1.80376862935062  | -0.38032890944641 | -6.01122169974652 |
| Br | -4.18886150181221 | 2.92610951957838  | 2.46235614830893  |

**Compound-5k**

-----  
**FINAL SINGLE POINT ENERGY -881.132717171891 Eh**  
 -----

|   |                   |                   |                   |
|---|-------------------|-------------------|-------------------|
| H | -1.81418142080905 | 3.00116893562939  | 0.62701590906781  |
| C | -2.66166710792769 | 2.75036046922224  | -0.00024261767570 |
| C | -3.90574140191310 | 2.51706473268148  | 0.58889164097540  |
| C | -4.97878876739834 | 2.22970654438753  | -0.25047452504393 |
| H | -5.95784940335254 | 2.05464717010754  | 0.17870250203579  |
| C | -4.81375478093722 | 2.12263471572991  | -1.62550078743287 |
| H | -5.64899830325676 | 1.84469715932966  | -2.25430064522199 |
| C | -3.55929042577374 | 2.32305006184327  | -2.19235613891447 |
| C | -2.48764965359782 | 2.67310832208478  | -1.37220005170214 |
| H | -1.52368307323591 | 2.88275047445790  | -1.81310562410204 |
| C | -0.38468766395089 | 0.12665042483871  | -4.51970884839519 |
| N | -0.63691168397942 | 0.04099175282928  | -5.84650656367187 |
| C | -1.71035383669597 | 0.62933524490475  | -6.34699158575054 |
| C | -2.60310657307829 | 1.36304975609728  | -5.55988100066383 |
| C | -1.23853145778941 | 0.77489513706700  | -3.63124899650280 |
| C | -2.34418050514487 | 1.41997103870893  | -4.17030526098349 |
| C | -3.82185569065002 | 2.08094860818443  | -5.79250603328327 |
| C | -4.25477982322576 | 2.52929112801026  | -4.58122211557752 |
| H | -1.87857888029812 | 0.51491773225867  | -7.41402964804128 |
| H | -1.04999021554485 | 0.75145496959012  | -2.56980993004741 |
| H | -4.30311187265773 | 2.25610477829647  | -6.74004400548109 |
| H | -5.11586813547102 | 3.12348207932122  | -4.32772589581706 |
| N | -3.36760793660875 | 2.13973120942985  | -3.58108372124426 |
| C | 0.86357926327787  | -0.50339633029887 | -4.03452159214623 |
| C | 1.52259083467392  | -0.01753367751670 | -2.90015826991802 |
| H | 1.13489080509486  | 0.85132225951531  | -2.38434681910508 |
| C | 2.69366875142667  | -0.60934733384804 | -2.44870072030946 |
| H | 3.19585267379332  | -0.20825117692701 | -1.57709471850581 |
| C | 3.23115336793664  | -1.69885938874687 | -3.12462997592154 |
| H | 4.14441900093874  | -2.16085522352484 | -2.77157393575973 |
| C | 2.59263666935454  | -2.18174720554027 | -4.26277250147230 |
| H | 3.01074854287082  | -3.02319167204526 | -4.80099282593988 |
| C | 1.42361575533829  | -1.58710654527155 | -4.71651700047306 |
| H | 0.92742951226859  | -1.94931561939385 | -5.60591001108734 |
| C | -4.05936615193940 | 2.55536130978174  | 2.08332905432134  |
| H | -5.08152618740730 | 2.32550950378190  | 2.38479231738813  |

|   |                   |                  |                  |
|---|-------------------|------------------|------------------|
| H | -3.39911542832866 | 1.82803008601167 | 2.56078226414169 |
| H | -3.79567879600140 | 3.53751856901187 | 2.48389867826141 |

### Compound-5l

-----  
**FINAL SINGLE POINT ENERGY -1070.861327176153 Eh**  
-----

|   |                   |                   |                   |
|---|-------------------|-------------------|-------------------|
| O | -1.42257856233832 | 3.15847438276048  | 0.93650511304911  |
| C | -2.44003717488994 | 2.79622669134724  | 0.11577768859617  |
| C | -3.67609297492702 | 2.62551272704794  | 0.73069342947127  |
| C | -4.78883943326677 | 2.29615293612125  | -0.03305938358620 |
| H | -3.77384179095733 | 2.77108598728593  | 1.79689137293337  |
| C | -4.67124662725500 | 2.10237909087824  | -1.41131380803989 |
| H | -5.50958318191147 | 1.79686691736875  | -2.01650829428403 |
| C | -3.42410393695233 | 2.26872872680296  | -2.00488142268117 |
| C | -2.30224524729502 | 2.62450597265002  | -1.26337465002028 |
| H | -1.36496188003019 | 2.79531155463514  | -1.76712414671708 |
| C | -0.47403669537886 | -0.01450065513229 | -4.58213073099557 |
| N | -0.69318704935372 | 0.11753108100876  | -5.91112038959797 |
| C | -1.72881116445159 | 0.82339737285968  | -6.33342878985927 |
| C | -2.60661193654185 | 1.46878497738758  | -5.45892977726074 |
| C | -1.26757570199235 | 0.60398318857566  | -3.61827330620264 |
| C | -2.33674964397113 | 1.36646747529506  | -4.07321829100340 |
| C | -3.78529500240517 | 2.27037744135822  | -5.60442538820005 |
| C | -4.17934146132144 | 2.62356187949728  | -4.34917600861748 |
| H | -1.87632412777915 | 0.88584376079634  | -7.40796065623762 |
| H | -1.04057908064082 | 0.50579907567884  | -2.56769599123902 |
| H | -4.26505184823041 | 2.56124018125033  | -6.52378801286067 |
| H | -4.99872954469601 | 3.24068450142359  | -4.02334222372562 |
| N | -3.30478958384770 | 2.09171098824888  | -3.40487299155536 |
| C | 0.69366005345147  | -0.83127653433530 | -4.17883518131696 |
| C | 0.68049501254643  | -1.59030331645013 | -3.00451116671389 |
| H | -0.22112336111664 | -1.63967105852102 | -2.40750298282304 |
| C | 1.80040188440362  | -2.31174719640590 | -2.61257591551083 |
| H | 1.7685555907017   | -2.90209147806247 | -1.70567366754945 |
| C | 2.95439391931795  | -2.28644422309432 | -3.38680742599708 |
| H | 3.82937099182624  | -2.84315735831651 | -3.07567658962132 |
| C | 2.97147763087699  | -1.55091199532331 | -4.56859923105999 |
| H | 3.86303740997617  | -1.53176028577462 | -5.18304580442646 |
| C | 1.84903386879810  | -0.83810574109339 | -4.96556629057767 |
| H | 1.85232283981703  | -0.27005360930596 | -5.88566081983741 |
| O | -5.95753701515441 | 2.17045892448344  | 0.64789748749064  |
| C | -7.15439484452515 | 1.98952530919400  | -0.09213341253010 |
| H | -7.28945946401364 | 2.78756329464565  | -0.82727466528937 |



|   |                   |                  |                   |
|---|-------------------|------------------|-------------------|
| H | -7.17007185297955 | 1.02192783632785 | -0.60306952575270 |
| H | -7.96128482545296 | 2.02642792749335 | 0.63602097817185  |
| C | -0.13301449811314 | 3.36533488528805 | 0.37869021882556  |
| H | 0.25313744586599  | 2.45140381929006 | -0.08165347666763 |
| H | -0.14246749526678 | 4.16753565073280 | -0.36403901817203 |
| H | 0.50705039110581  | 3.65279889408175 | 1.20887314799213  |

### Compound-5n

-----  
**FINAL SINGLE POINT ENERGY -1055.592732704585 Eh**  
 -----

|   |                   |                   |                   |
|---|-------------------|-------------------|-------------------|
| O | 4.46548004360759  | -0.54470959964814 | -2.10956328495435 |
| C | -3.90995298178229 | 3.19571667315633  | -0.26952497224207 |
| C | -5.07476322933566 | 2.71211167928416  | 0.29919573079152  |
| C | -5.93296844802415 | 1.87393428196803  | -0.38995437206114 |
| F | -5.38364376167291 | 3.07607658932124  | 1.56100216243931  |
| C | -5.60853651701995 | 1.50337555509440  | -1.68894224719495 |
| H | -6.25576491229166 | 0.83386299472695  | -2.23919808556846 |
| C | -4.44777870420500 | 1.98708322561782  | -2.28833196721236 |
| C | -3.60206881788790 | 2.83401606066444  | -1.57264910927992 |
| H | -2.71347579448006 | 3.22589891069648  | -2.04644397786279 |
| C | -0.60222229387261 | 0.71160825404281  | -4.28197820509697 |
| N | -0.67415322595724 | 0.70083281483340  | -5.63506066415572 |
| C | -1.82483128080638 | 0.94909728758438  | -6.23688714548561 |
| C | -2.99440755046979 | 1.24913464769293  | -5.53240560773721 |
| C | -1.69896244578154 | 1.02593454659403  | -3.48061133766516 |
| C | -2.89500087345664 | 1.31099547250828  | -4.12325378652696 |
| C | -4.35451223576549 | 1.54962683285338  | -5.87398168811457 |
| C | -5.01478404376622 | 1.77992130562976  | -4.70499265837918 |
| H | -1.82563849153465 | 0.91189813087605  | -7.32253392766607 |
| H | -1.62071436447066 | 1.05588740969426  | -2.40524350611577 |
| H | -4.78379999068500 | 1.59931931608193  | -6.86068795879613 |
| H | -6.03636313813672 | 2.07012785033801  | -4.52743416221601 |
| N | -4.13947350217116 | 1.65045510791617  | -3.62741147766807 |
| C | 0.70975187094106  | 0.38130975497062  | -3.68348561984972 |
| C | 0.83640063898788  | 0.02614526308629  | -2.34120474437081 |
| H | -0.03938794018993 | -0.04094290562181 | -1.71047646940808 |
| C | 2.06754454778541  | -0.28299142213252 | -1.77720742323556 |
| H | 2.11222671287582  | -0.56752288843223 | -0.73661944244865 |
| C | 3.21755163060080  | -0.24448546753025 | -2.56273861242625 |
| H | -3.26745826823426 | 3.85419307685101  | 0.29846511474085  |
| C | 3.11164646688475  | 0.11010906626286  | -3.91018280713374 |
| H | 4.01103100695211  | 0.13940142866152  | -4.51133607279852 |

|   |                   |                   |                   |
|---|-------------------|-------------------|-------------------|
| C | 1.87877059724886  | 0.40868313162126  | -4.45778088211575 |
| H | 1.79767129951162  | 0.67412081232718  | -5.50231430398293 |
| H | -6.83050922263707 | 1.51026362923201  | 0.09064266383594  |
| C | 4.59799926221012  | -0.95874515103874 | -0.75883892506176 |
| H | 4.00290877758370  | -1.85415032711503 | -0.55592044749522 |
| H | 4.29801910393612  | -0.16440884823926 | -0.06891727218441 |
| H | 5.65155007550915  | -1.18596450043005 | -0.61258250729663 |

### Compound-5s

-----  
**FINAL SINGLE POINT ENERGY -1185.376417852070 Eh**  
 -----

|   |                   |                   |                   |
|---|-------------------|-------------------|-------------------|
| O | 4.59198340967297  | -0.21538593542813 | -2.22566799799689 |
| C | -3.88470400555329 | 2.66026077995141  | -0.10877029863568 |
| C | -5.20516346719660 | 2.53907626533382  | 0.30608087740916  |
| C | -6.16525047942670 | 2.10770695789825  | -0.60005396969459 |
| C | -5.80965145202219 | 1.73911293578406  | -1.89776394095045 |
| H | -6.54402134262076 | 1.34048660502886  | -2.57767963421565 |
| C | -4.48005575537633 | 1.86570406713107  | -2.29916442543321 |
| C | -3.51300081111049 | 2.34721299919031  | -1.41788107106503 |
| H | -2.51177306243212 | 2.52827811031995  | -1.76482860438164 |
| C | -0.60409929204406 | 0.53779882430252  | -4.32920366776211 |
| N | -0.69182019480548 | 0.51937691996671  | -5.67944210374220 |
| C | -1.85205315666595 | 0.76779987099372  | -6.26224573218489 |
| C | -3.00182291320228 | 1.09602596614513  | -5.54225934073834 |
| C | -1.69746895117285 | 0.82772164959061  | -3.51218935407715 |
| C | -2.89812232177358 | 1.15117595078549  | -4.13100963958948 |
| C | -4.34731135425938 | 1.44681592519730  | -5.88543311151301 |
| C | -4.99608671872976 | 1.70541165693957  | -4.71942827128377 |
| H | -1.87552685760953 | 0.71644741715007  | -7.34712158463203 |
| H | -1.60314932675573 | 0.81539356485016  | -2.44067532093641 |
| H | -4.77142867065925 | 1.51809670029695  | -6.87312606521023 |
| H | -6.00262768234810 | 2.04564125924086  | -4.55637049881459 |
| N | -4.13292937561627 | 1.54403062143549  | -3.63319176600138 |
| C | 0.73528664946299  | 0.28812193386021  | -3.74905401843133 |
| C | 0.92464831485811  | 0.06808334372069  | -2.38542582846037 |
| H | 0.07629053940283  | 0.01519250409736  | -1.71690855301197 |
| C | 2.18922069009403  | -0.10955761641175 | -1.83822372622561 |
| H | 2.28291901039444  | -0.28656106340116 | -0.77722875365004 |
| C | 3.31153889065915  | -0.06776704913439 | -2.66336850345172 |
| O | -3.01473134712574 | 3.12417013742730  | 0.82600676558242  |
| C | 3.14206912384774  | 0.13491738294712  | -4.03496487183369 |
| H | 4.01966305798856  | 0.15988140320656  | -4.66770086988729 |

|   |                   |                   |                   |
|---|-------------------|-------------------|-------------------|
| C | 1.87727917405474  | 0.30482534296860  | -4.56425132422375 |
| H | 1.74798201283483  | 0.46631255542153  | -5.62492316389986 |
| O | -7.44109820169456 | 2.06294772214422  | -0.13346260832454 |
| C | 4.79829959518040  | -0.44400605138954 | -0.84241291122213 |
| H | 4.30214262873478  | -1.36143951047482 | -0.51131392814434 |
| H | 4.43496957969183  | 0.39569088611591  | -0.24262998177641 |
| H | 5.87279326930411  | -0.54690022399270 | -0.70836032864021 |
| H | -5.48857571506107 | 2.81194684957755  | 1.31214085721489  |
| C | -1.65413956459339 | 3.29312173222382  | 0.46398806593257  |
| H | -1.19810415758384 | 2.34276992785937  | 0.17161256778275  |
| H | -1.54153437302357 | 4.01256327386383  | -0.35147094876688 |
| H | -1.15579892301833 | 3.67779559413071  | 1.35027821372447  |
| C | -8.50185822706449 | 1.94868627082001  | -1.06907404556603 |
| H | -8.41614614595197 | 2.70452147534104  | -1.85506019613105 |
| H | -8.53488836960946 | 0.95561980860173  | -1.52760486746158 |
| H | -9.41568373007426 | 2.11430425837250  | -0.50275151967853 |
